# Supplementary material
Source: PubMed Central journal article supplement (PMC4474294)
Supplement: JVI.00459-15_zjv999090447so1.pdf [file JVI.00459-15_zjv999090447so1.pdf]

## Supplementary Materials

### **Figure S1. Maximum likelihood tree of human and swine pandemic H1 segments.**

Phylogenetic relationships of 2,347 H1-pdm sequences collected globally from humans and swine, inferred using maximum likelihood (ML) methods. Branch lengths represent genetic distance and are drawn to scale. Bootstrap values for key nodes > 75 are provided. Swine viruses are shaded red. Human viruses are broadly labeled by the season they were collected. The 133 introductions of pandemic influenza viruses from humans to swine are indicated in parentheses.

**Figure S2. Phylogenetic relationships between pandemic H1 segments.** Similar MCC tree as that presented in Fig. 1, with tip labels displayed. Posterior probabilities > 0.80 are provided for key nodes. The orange box indicates viruses collected in 2013-14. Viruses collected from US swine in 2014 that had all eight genome segments of pandemic origin (listed in Table 1) are indicated with solid black circles. Colored arrows indicate swIAVs that are discussed in the main text: *A/swine/lowa/A01049077/2010/H1N1* and *A/swine/lowa/A01049195/2010/H1N1* are indicated with a black arrow, *A/swine/Minnesota/A01076188/2010/H1N1* is indicated with a purple arrow, and *A/swine/Illinois/A01395201/2013/H1N1* is indicated with an orange arrow.

**Figure S3. Phylogenetic relationships between pandemic N1 segments.** Time-scaled Bayesian MCC tree inferred for the NA (N1) sequences of 866 viruses collected from swine and humans in the United States during 2009-2014, including 178 viruses from swine and 688 viruses from humans. Branches are shaded by host and time period (US influenza epidemic) of collection (September – August): human = pink; swine viruses collected during 2009-2010 = red; swine viruses collected 2010-2011 = light green; swine viruses collected 2011-2012 = dark green; swine viruses collected 2012-2013 = royal blue; swine viruses collected 2013-2014 = dark blue. Posterior probabilities > 0.80 are provided for key nodes.

**Figure S4. Heat-map of viral transmission between humans and swine for HA segment.**

Similar to the heat-map presented in Fig. 2, except representing 'Markov jump' counts inferred from the HA phylogeny.

**Figure S5. Phylogenetic relationships between pandemic NP segments.** Time-scaled Bayesian MCC tree inferred for the NP sequences of 427 viruses collected from swine and humans in the United States during 2009-2014, including 206 viruses from swine and 221 viruses from humans. Branches are shaded by the host and the number of segment of pandemic H1N1 virus origin: all human viruses are purple; swine viruses (swIAVs) with 1 pH1N1 segment = pink; swIAVs with 2 pH1N1 segments = red; swIAVs with 3 pH1N1 segments = yellow; swIAVs with 4 pH1N1 segments = olive; swIAVs with 5 pH1N1 segments = light green; swIAVs with 6 pH1N1 segments = dark green; swIAVs with 7 pH1N1 segments = blue; swIAVs with 8 pH1N1 segments = dark blue. Posterior probabilities > 0.90 are provided for key nodes. Major clusters of swIAVs on the NP phylogeny are labeled: NP-I, NP-II, NP-III, NP-IV. A/sw/Minnesota/165A/2009/H1N1 and A/sw/Minnesota/074A/2009/H1N1 are indicated with a black arrow.

**Figure S6. Phylogenetic relationships between pandemic PB2 segments.** Maximum likelihood tree inferred for the PB2 segment from pandemic H1N1 influenza viruses collected globally from humans (n = 1295 viruses) and swine (n = 496 viruses), collected globally during 2009-2014. Bootstrap values > 70 provided for key nodes.

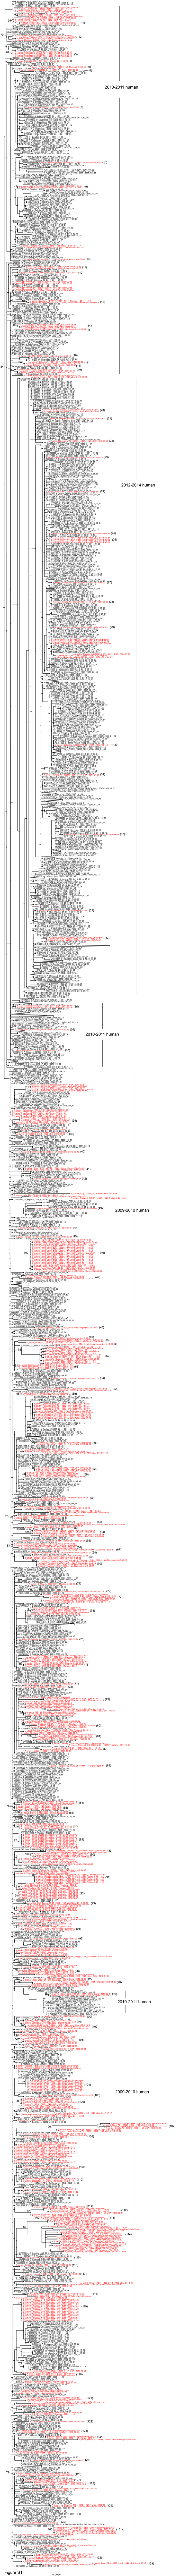

Figure S1

0.0050

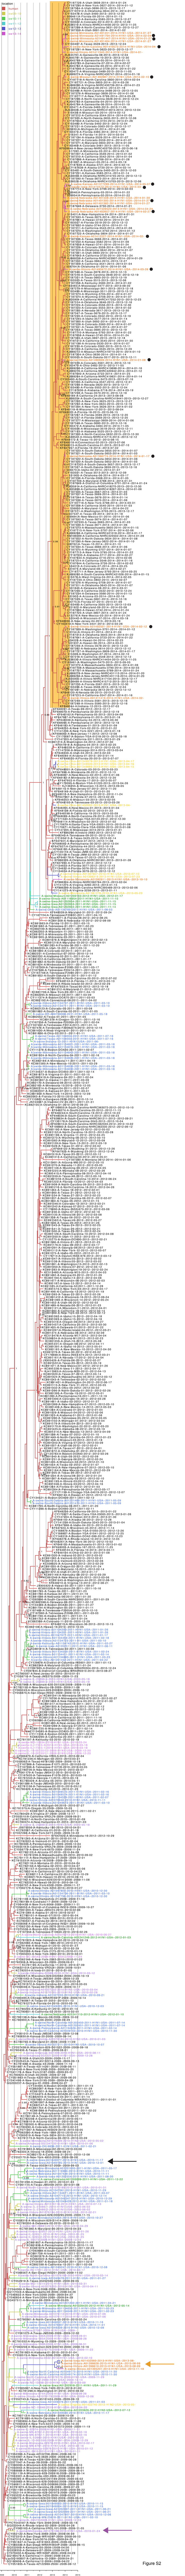

Figure S2

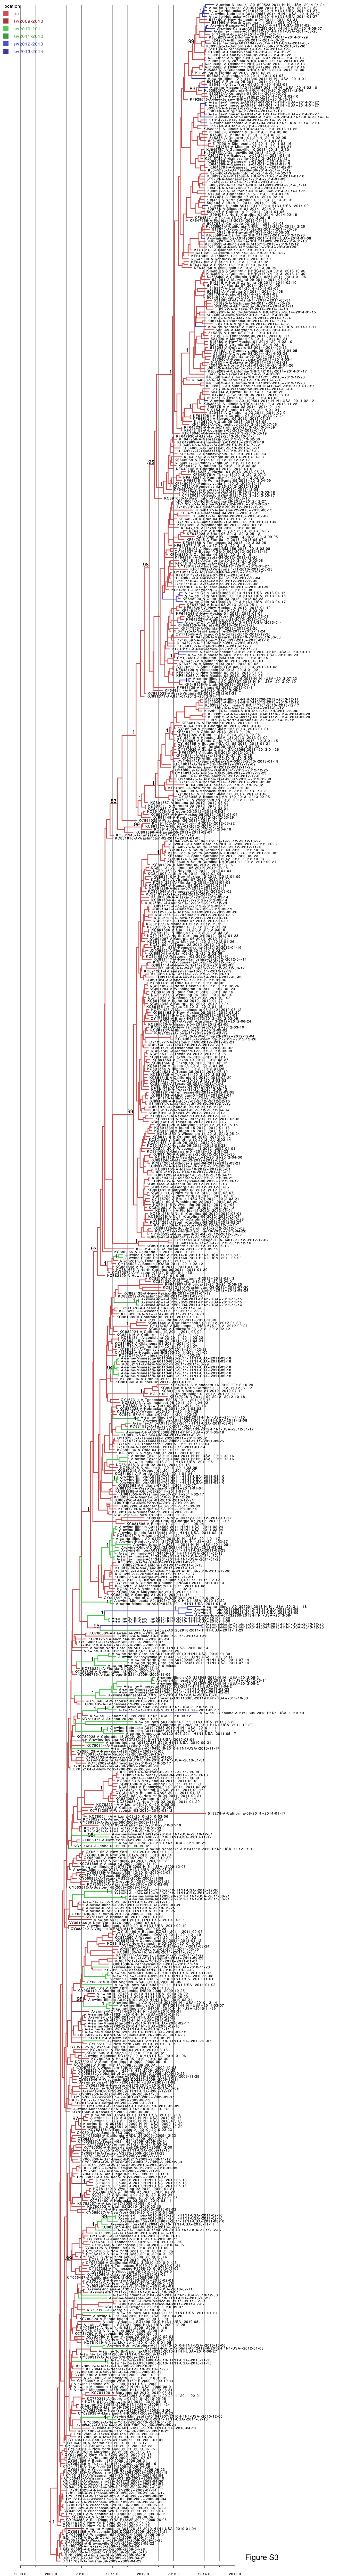

Figure S3

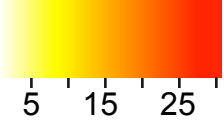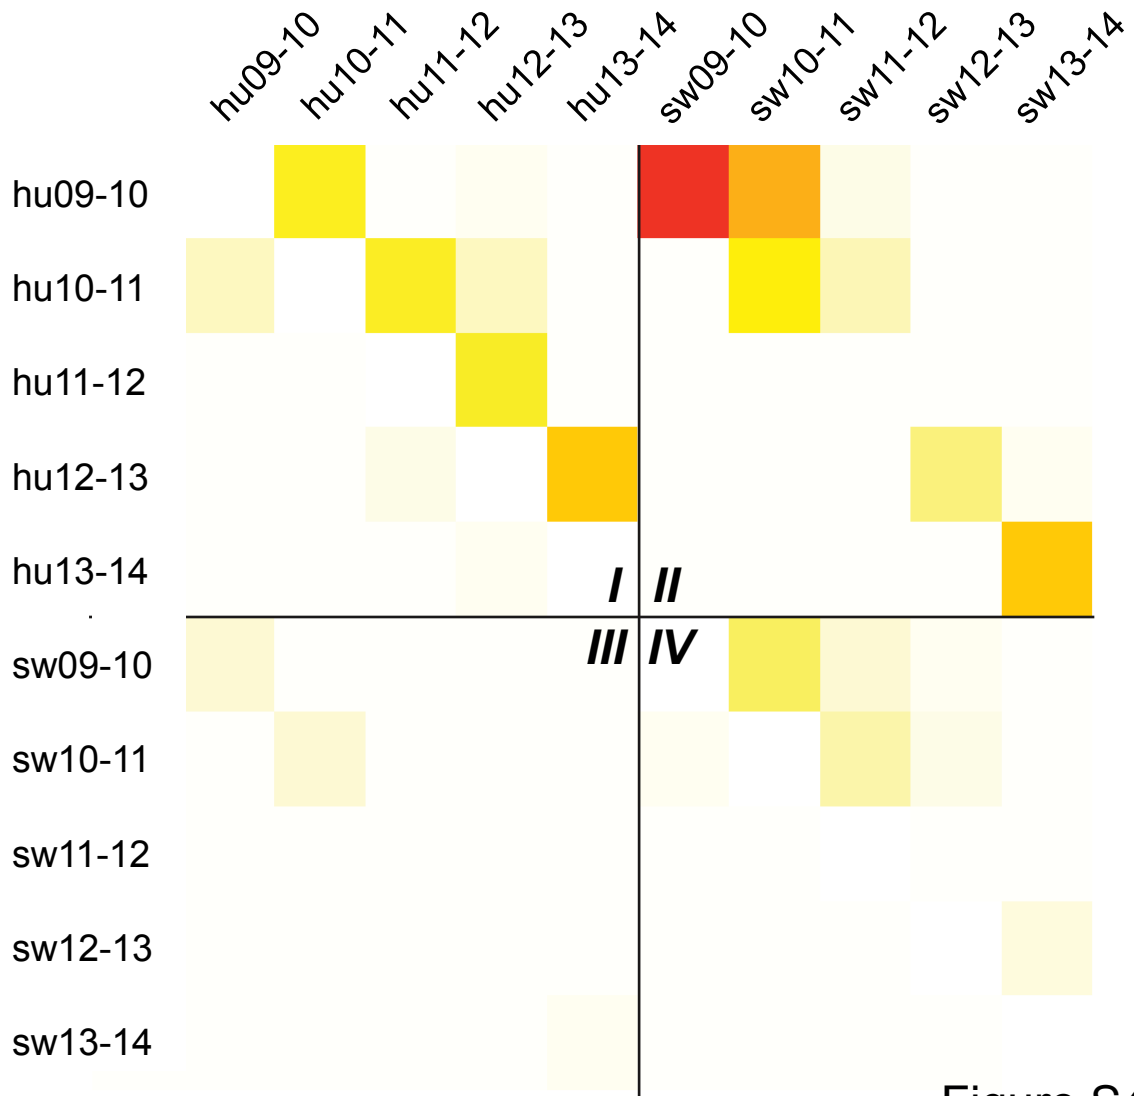

Figure S4

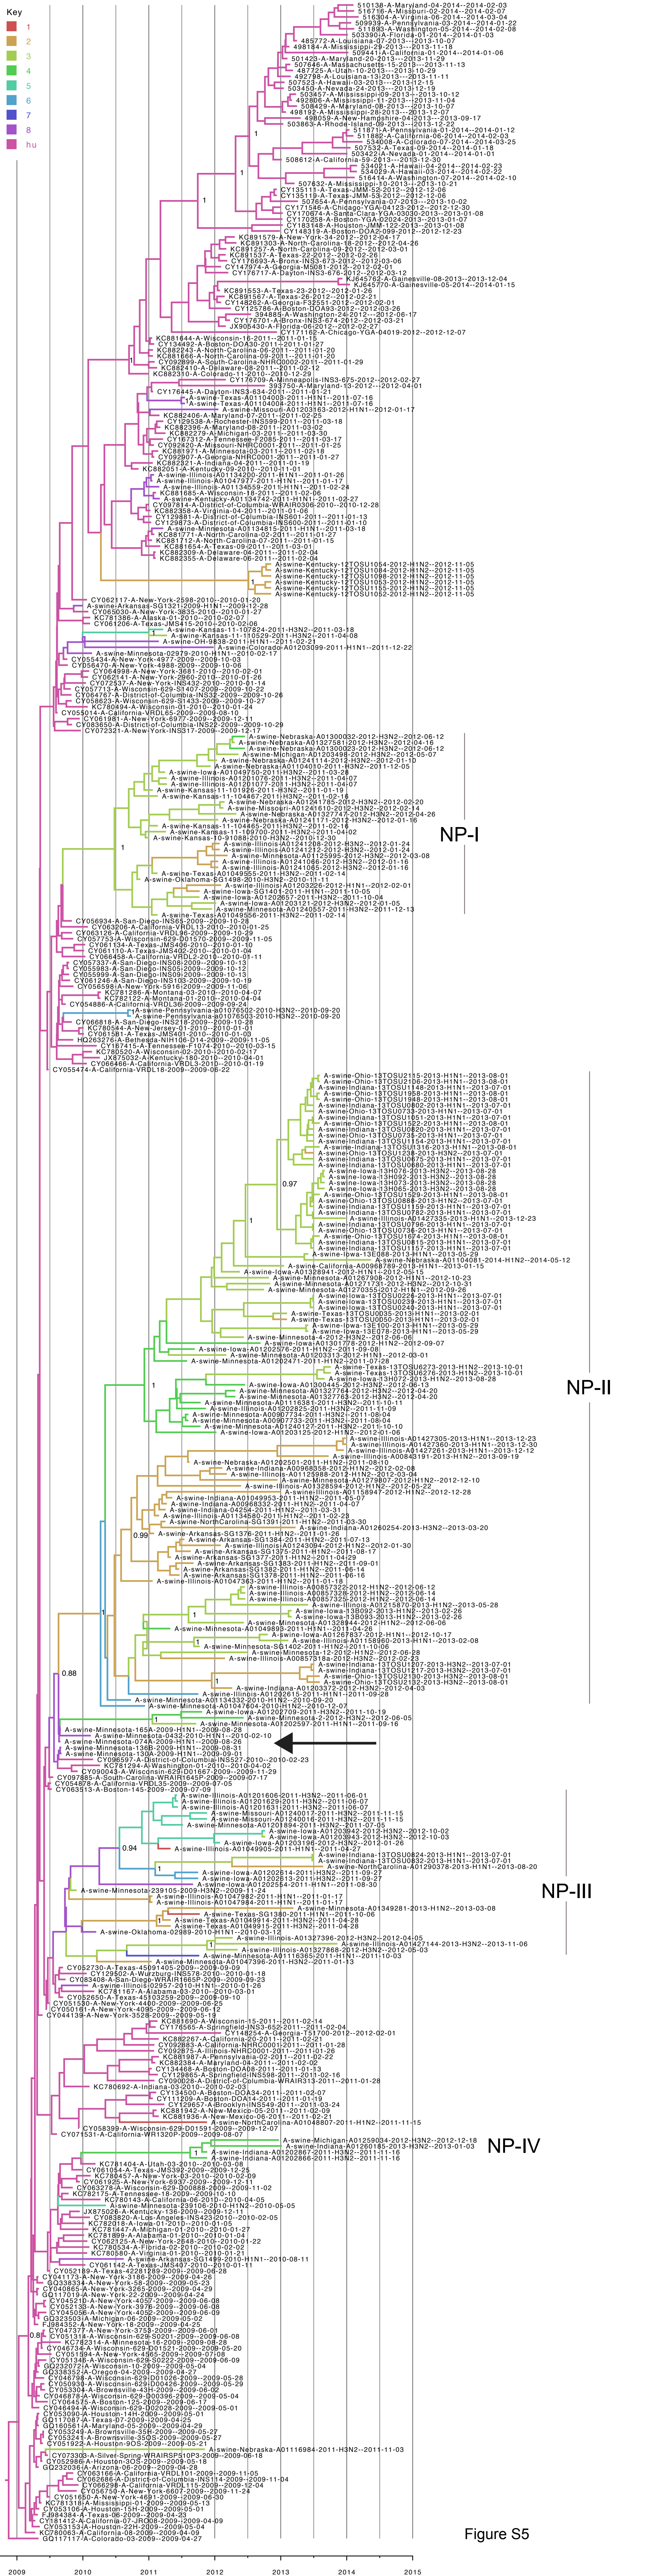

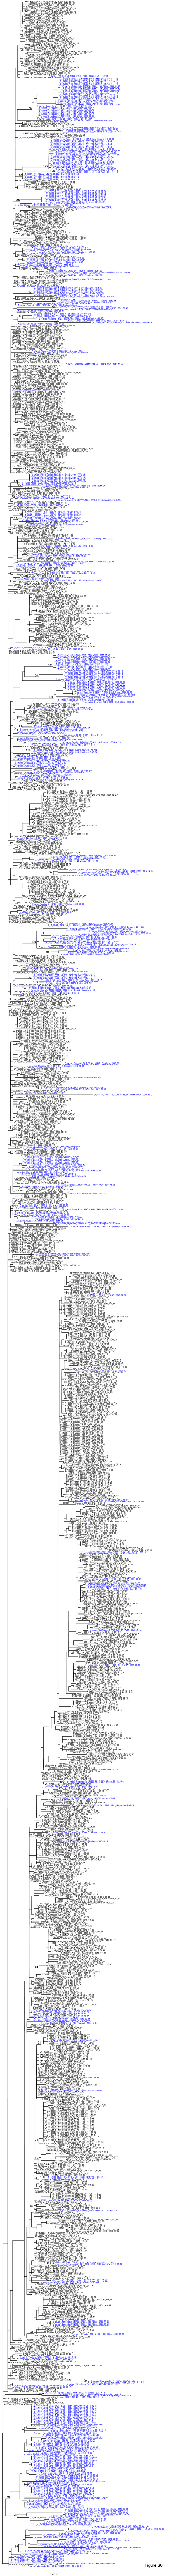

Figure S6



**Table S1. 100 HA sequences from human H1N1 pandemic viruses from 2014 obtained from the GISAID Epiflu database.**

| <b>Virus name</b>             | <b>Date</b> | <b>Originating lab</b>                                                | <b>Submitting Lab</b>                            | <b>ID</b> |
|-------------------------------|-------------|-----------------------------------------------------------------------|--------------------------------------------------|-----------|
| A/Arizona/03/2014             | 2/16/14     | Arizona Department of Health Services                                 | Centers for Disease Control and Prevention       | EPI531902 |
| A/Bahamas/798/2014            | 2/25/14     | Caribbean Epidemiology Center                                         | Centers for Disease Control and Prevention       | EPI533517 |
| A/Bahrain/232/2014            | 4/27/14     | Ministry of Health Bahrain                                            | Centers for Disease Control and Prevention       | EPI536859 |
| A/Belgium/14S0350/2014        | 3/13/14     | Scientific Institute of Public Health                                 | National Institute for Medical Research          | EPI532741 |
| A/Berlin/7/2014               | 1/22/14     | Robert-Koch-Institute                                                 | National Institute for Medical Research          | EPI515413 |
| A/Bulgaria/475/2014           | 1/30/14     | National Centre of Infectious and                                     | National Institute for Medical Research          | EPI531197 |
| A/Bulgaria/775/2014           | 2/11/14     | National Centre of Infectious and                                     | National Institute for Medical Research          | EPI531207 |
| A/CHIBA-C/42/2014             | 3/10/14     | Chiba City Institute of Health and Environment                        | National Institute of Infectious Diseases (NIID) | EPI532958 |
| A/CHIBA/19/2014               | 2/13/14     | Chiba Prefectural Institute of Public Health                          | National Institute of Infectious Diseases (NIID) | EPI522319 |
| A/Colorado/07/2014            | 3/25/14     | Colorado Department of Health Lab                                     | Centers for Disease Control and Prevention       | EPI534013 |
| A/Cyprus/F18/2014             | 1/27/14     | Nicosia General Hospital                                              | National Institute for Medical Research          | EPI516949 |
| A/Cyprus/F24/2014             | 1/27/14     | Nicosia General Hospital                                              | National Institute for Medical Research          | EPI516953 |
| A/Delaware/08/2014            | 3/31/14     | Delaware Public Health Lab                                            | Centers for Disease Control and Prevention       | EPI531843 |
| A/Distrito Federal/16117/2014 | 2/25/14     | Instituto Adolfo Lutz                                                 | Instituto Adolfo Lutz                            | EPI516479 |
| A/Distrito Federal/2648/2014  | 1/3/14      | Instituto Adolfo Lutz                                                 | Instituto Adolfo Lutz                            | EPI508729 |
| A/EHIME/31/2014               | 3/5/14      | Ehime Prefecture Institute of Public Health and Environmental Science | National Institute of Infectious Diseases (NIID) | EPI530552 |
| A/Finland/420/2014            | 2/26/14     | National Institute for Health and Welfare                             | National Institute for Medical Research          | EPI532747 |
| A/Florida/07/2014             | 1/9/14      | Florida Department of Health-Tampa                                    | Centers for Disease Control and Prevention       | EPI504775 |
| A/Florida/09/2014             | 1/15/14     | Florida Department of Health-Tampa                                    | Centers for Disease Control and Prevention       | EPI508461 |

|                      |         |                                                                    |                                                     |           |
|----------------------|---------|--------------------------------------------------------------------|-----------------------------------------------------|-----------|
| A/Florida/14/2014    | 3/4/14  | Florida Department of Health-<br>Jacksonville                      | Centers for Disease Control and Prevention          | EPI516341 |
| A/FUKUI/56/2014      | 3/25/14 | Fukui Prefectural Institute of<br>Public Health                    | National Institute of Infectious Diseases<br>(NIID) | EPI532964 |
| A/FUKUOKA-C/2/2014   | 1/24/14 | Fukuoka City Institute for Hygiene<br>and the Environment          | National Institute of Infectious Diseases<br>(NIID) | EPI528082 |
| A/FUKUSHIMA/14/2014  | 1/23/14 | Fukushima Prefectural Institute of<br>Public Health                | National Institute of Infectious Diseases<br>(NIID) | EPI530570 |
| A/Gavle/3/2014       | 2/6/14  |                                                                    | Swedish Institute for Infectious Disease<br>Control | EPI508263 |
| A/Georgia/622/2014   | 3/18/14 | National Centre for Disease<br>Control and Public Health           | National Institute for Medical Research             | EPI531229 |
| A/GIFU/7/2014        | 1/9/14  | Gifu Prefectural Institute of Health<br>and Environmental Sciences | National Institute of Infectious Diseases<br>(NIID) | EPI520322 |
| A/Goiias/51172/2014  | 5/5/14  | Instituto Adolfo Lutz                                              | Instituto Adolfo Lutz                               | EPI532849 |
| A/Hawaii/04/2014     | 2/23/14 | State of Hawaii Department of<br>Health                            | Centers for Disease Control and Prevention          | EPI534028 |
| A/Hawaii/06/2014     | 3/1/14  | State of Hawaii Department of<br>Health                            | Centers for Disease Control and Prevention          | EPI534003 |
| A/Iceland/3/2014     | 1/15/14 | Landspítali - University Hospital                                  | National Institute for Medical Research             | EPI503214 |
| A/Idaho/02/2014      | 1/7/14  | State of Idaho Bureau of<br>Laboratories                           | Centers for Disease Control and Prevention          | EPI509470 |
| A/Illinois/01/2014   | 1/4/14  | Illinois Department of Public<br>Health-Chicago                    | Centers for Disease Control and Prevention          | EPI510154 |
| A/Kaliningrad/3/2014 | 3/25/14 | WHO National Influenza Centre<br>Russian Federation                | National Institute for Medical Research             | EPI536277 |
| A/Krasnoyarsk/2/2014 | 4/14/14 | WHO National Influenza Centre<br>Russian Federation                | National Institute for Medical Research             | EPI536281 |
| A/Lorraine/1248/2014 | 3/31/14 | Institut Pasteur                                                   | National Institute for Medical Research             | EPI541063 |
| A/Louisiana/01/2014  | 1/2/14  | New York State Department of<br>Health                             | Centers for Disease Control and Prevention          | EPI511899 |
| A/Maine/02/2014      | 2/12/14 | Maine Health and Environmental<br>Testing Laboratory               | Centers for Disease Control and Prevention          | EPI531893 |
| A/Maryland/02/2014   | 1/3/14  | Maryland Department of Health<br>and Mental Hygiene                | Centers for Disease Control and Prevention          | EPI508743 |
| A/Maryland/04/2014   | 2/3/14  | Maryland Department of Health                                      | Centers for Disease Control and Prevention          | EPI510143 |

|                          |         |                                                                           |                                                  |           |
|--------------------------|---------|---------------------------------------------------------------------------|--------------------------------------------------|-----------|
|                          |         | and Mental Hygiene                                                        |                                                  |           |
| A/Maryland/06/2014       | 1/18/14 | Maryland Department of Health and Mental Hygiene                          | Centers for Disease Control and Prevention       | EPI515485 |
| A/Maryland/08/2014       | 2/21/14 | Maryland Department of Health and Mental Hygiene                          | Centers for Disease Control and Prevention       | EPI531875 |
| A/Maryland/09/2014       | 3/8/14  | Maryland Department of Health and Mental Hygiene                          | Centers for Disease Control and Prevention       | EPI531922 |
| A/Maryland/12/2014       | 4/22/14 | Maryland Department of Health and Mental Hygiene                          | Centers for Disease Control and Prevention       | EPI536850 |
| A/Mato Grosso/19061/2014 | 3/20/14 | Instituto Adolfo Lutz                                                     | Instituto Adolfo Lutz                            | EPI516481 |
| A/Michigan/02/2014       | 1/8/14  | University of Michigan SPH EPID                                           | Centers for Disease Control and Prevention       | EPI503830 |
| A/Minnesota/03/2014      | 3/16/14 | Minnesota Department of Health                                            | Centers for Disease Control and Prevention       | EPI517091 |
| A/Missouri/03/2014       | 2/12/14 | Missouri Department. of Health & Senior Services                          | Centers for Disease Control and Prevention       | EPI516438 |
| A/Missouri/05/2014       | 3/19/14 | Missouri Department. of Health & Senior Services                          | Centers for Disease Control and Prevention       | EPI531867 |
| A/New Hampshire/04/2014  | 1/31/14 | New Hampshire Public Health Laboratories                                  | Centers for Disease Control and Prevention       | EPI515401 |
| A/New Mexico/01/2014     | 1/6/14  | New Mexico Department of Health                                           | Centers for Disease Control and Prevention       | EPI509484 |
| A/New Mexico/03/2014     | 1/24/14 | New Mexico Department of Health                                           | Centers for Disease Control and Prevention       | EPI513276 |
| A/OKAYAMA/27/2014        | 1/23/14 | Okayama Prefectural Institute for Environmental Science and Public Health | National Institute of Infectious Diseases (NIID) | EPI534666 |
| A/Oklahoma/01/2014       | 1/6/14  | Oklahoma State Department of Health                                       | Centers for Disease Control and Prevention       | EPI508764 |
| A/Oklahoma/06/2014       | 3/17/14 | Oklahoma State Department of Health                                       | Centers for Disease Control and Prevention       | EPI531905 |
| A/Oman/586/2014          | 2/23/14 | Central Public Health Laboratory, Ministry of Health                      | Centers for Disease Control and Prevention       | EPI516355 |
| A/OSAKA-C/43/2014        | 2/2/14  | Osaka City Institute of Public Health and Environmental Sciences          | National Institute of Infectious Diseases (NIID) | EPI508483 |
| A/Paris/043/2014         | 1/3/14  | Institut Pasteur                                                          | Institut Pasteur                                 | EPI510885 |
| A/Paris/631/2014         | 2/11/14 | Institut Pasteur                                                          | Institut Pasteur                                 | EPI533931 |
| A/Pennsylvania/02/2014   | 1/22/14 | Pennsylvania Department of                                                | Centers for Disease Control and Prevention       | EPI509954 |

| Health                          |         |                                                                     |                                                  |           |
|---------------------------------|---------|---------------------------------------------------------------------|--------------------------------------------------|-----------|
| A/Pennsylvania/03/2014          | 1/22/14 | Pennsylvania Department of Health                                   | Centers for Disease Control and Prevention       | EPI509946 |
| A/Perugia/28/2014               | 2/14/14 | Istituto Superiore di Sanità                                        | National Institute for Medical Research          | EPI531237 |
| A/Perugia/38/2014               | 2/26/14 | Istituto Superiore di Sanità                                        | National Institute for Medical Research          | EPI531239 |
| A/Picardie/1221/2014            | 3/17/14 | Institut Pasteur                                                    | Institut Pasteur                                 | EPI537806 |
| A/Poland/1612/2014              | 4/3/14  | National Institute of Public Health - National Institute of Hygiene | National Institute for Medical Research          | EPI531247 |
| A/Rethymno.GR/813/2014          | 2/17/14 | Hellenic Pasteur Institute                                          | Hellenic Pasteur Institute                       | EPI508709 |
| A/Roma/9/2014                   | 2/3/14  | Istituto Superiore di Sanità                                        | National Institute for Medical Research          | EPI531257 |
| A/Saint-Petersburg/RII392S/2014 | 1/28/14 | WHO National Influenza Centre Russian Federation                    | WHO National Influenza Centre Russian Federation | EPI514572 |
| A/SAITAMA/48/2014               | 2/4/14  | Saitama Institute of Public Health                                  | National Institute of Infectious Diseases (NIID) | EPI508479 |
| A/SAITAMA/49/2014               | 1/27/14 | Saitama Institute of Public Health                                  | National Institute of Infectious Diseases (NIID) | EPI508480 |
| A/SAPPORO/16/2014               | 1/20/14 | Sapporo City Institute of Public Health                             | National Institute of Infectious Diseases (NIID) | EPI507745 |
| A/SAPPORO/18/2014               | 1/14/14 | Sapporo City Institute of Public Health                             | National Institute of Infectious Diseases (NIID) | EPI507747 |
| A/SAPPORO/21/2014               | 1/17/14 | Sapporo City Institute of Public Health                             | National Institute of Infectious Diseases (NIID) | EPI507749 |
| A/SAPPORO/25/2014               | 1/17/14 | Sapporo City Institute of Public Health                             | National Institute of Infectious Diseases (NIID) | EPI507753 |
| A/SAPPORO/55/2014               | 1/29/14 | Sapporo City Institute of Public Health                             | National Institute of Infectious Diseases (NIID) | EPI515064 |
| A/SAPPORO/57/2014               | 2/3/14  | Sapporo City Institute of Public Health                             | National Institute of Infectious Diseases (NIID) | EPI515068 |
| A/SAPPORO/60/2014               | 2/1/14  | Sapporo City Institute of Public Health                             | National Institute of Infectious Diseases (NIID) | EPI515072 |
| A/SAPPORO/65/2014               | 2/4/14  | Sapporo City Institute of Public Health                             | National Institute of Infectious Diseases (NIID) | EPI507781 |
| A/SAPPORO/66/2014               | 1/29/14 | Sapporo City Institute of Public Health                             | National Institute of Infectious Diseases (NIID) | EPI515078 |
| A/SAPPORO/78/2014               | 2/8/14  | Sapporo City Institute of Public Health                             | National Institute of Infectious Diseases        | EPI515096 |

|                             |         |                                                                              |                                                                  |           |
|-----------------------------|---------|------------------------------------------------------------------------------|------------------------------------------------------------------|-----------|
| A/SAPPORO/81/2014           | 2/4/14  | Health<br>Sapporo City Institute of Public Health                            | (NIID)<br>National Institute of Infectious Diseases (NIID)       | EPI515102 |
| A/Slovenia/220/2014         | 1/22/14 | Laboratory for Virology, National Institute of Public Health                 | National Institute for Medical Research                          | EPI532789 |
| A/SOUTH AUSTRALIA/4/2014    | 1/28/14 | Institute of Medical and Veterinary Science (IMVS)                           | WHO Collaborating Centre for Reference and Research on Influenza | EPI529474 |
| A/Stockholm/1/2014          | 1/10/14 |                                                                              | Swedish Institute for Infectious Disease Control                 | EPI504703 |
| A/Stockholm/10/2014         | 2/18/14 | Swedish Institute for Infectious Disease Control                             | National Institute for Medical Research                          | EPI532793 |
| A/Stockholm/16/2014         | 4/2/14  |                                                                              | Swedish Institute for Infectious Disease Control                 | EPI531441 |
| A/Stockholm/3/2014          | 1/6/14  | Swedish Institute for Infectious Disease Control                             | National Institute for Medical Research                          | EPI532795 |
| A/Sukhothai/214/2014        | 3/21/14 | WHO National Influenza Centre, National Institute of Medical Research (NIMR) | Centers for Disease Control and Prevention                       | EPI531878 |
| A/Sundsvall/1/2014          | 2/25/14 |                                                                              | Swedish Institute for Infectious Disease Control                 | EPI516055 |
| A/Switzerland/10015059/2014 | 2/3/14  | Hopital Cantonal Universitaire de Geneves                                    | National Institute for Medical Research                          | EPI531259 |
| A/Switzerland/9884275/2014  | 1/14/14 | Hopital Cantonal Universitaire de Geneves                                    | National Institute for Medical Research                          | EPI507849 |
| A/Taiwan/362/2014           | 3/18/14 | Center for Disease Control                                                   | National Institute of Infectious Diseases (NIID)                 | EPI534686 |
| A/Texas/09/2014             | 1/18/14 | Texas Department of State Health Services-Laboratory Services                | Centers for Disease Control and Prevention                       | EPI521914 |
| A/Texas/10/2014             | 1/10/14 | Texas Department of State Health Services-Laboratory Services                | Centers for Disease Control and Prevention                       | EPI508762 |
| A/TOTTORI/1/2014            | 4/1/14  | Tottori Prefectural Institute of Public Health and Environmental Science     | National Institute of Infectious Diseases (NIID)                 | EPI531970 |
| A/TOWNSVILLE/11/2014        | 2/4/14  | Queensland Health Scientific Services                                        | WHO Collaborating Centre for Reference and Research on Influenza | EPI529519 |
| A/Ukraine/28/2014           | 1/24/14 | Institute of Epidemiology and                                                | National Institute for Medical Research                          | EPI531261 |

|                         |         |                                                |                                            |           |
|-------------------------|---------|------------------------------------------------|--------------------------------------------|-----------|
|                         |         | Infectious Diseases AMS of<br>Ukraine          |                                            |           |
| A/Viotia.GR/311/2014    | 1/31/14 | Hellenic Pasteur Institute                     | Hellenic Pasteur Institute                 | EPI505129 |
| A/Washington/07/2014    | 2/10/14 | Spokane Regional Health District               | Centers for Disease Control and Prevention | EPI516420 |
| A/West Virginia/04/2014 | 2/5/14  | West Virginia Office of Laboratory<br>Services | Centers for Disease Control and Prevention | EPI515378 |
| A/Wisconsin/07/2014     | 3/18/14 | Wisconsin State Laboratory of<br>Hygiene       | Centers for Disease Control and Prevention | EPI520440 |

**Table S2. Pandemic H1N1 influenza A virus sequences (HA segment) used in this analysis (Fig. 1).** Virus name, date of viral collection, and GenBank accession number for HA sequences from 173 influenza viruses collected in swine in the United States during 2009-2014 and 760 influenza viruses collected in humans in the United States during 2009-2014. Accession numbers beginning with '5' refer to the 30 HA sequences from human influenza viruses from 2014 that were downloaded from the GISAID database ([www.gisaid.org](http://www.gisaid.org)) to supplement the number of viruses from this underrepresented years (listed in Table S1).

| <b>Virus Name</b>                     | <b>Date</b> | <b>Accession</b> |
|---------------------------------------|-------------|------------------|
| A/swine/Arkansas/SG1321/2009(H1N1)    | 12/28/09    | AHB51413         |
| A/swine/Arkansas/SG1347/2010(H1N1)    | 1/6/10      | AHB52267         |
| A/swine/Arkansas/SG1499/2010(H1N1)    | 8/11/10     | AHB23106         |
| A/swine/Colorado/A01203099/2011(H1N1) | 12/22/11    | AFM47004         |
| A/swine/IL/10-001550/2009(H1N1)       | 12/29/09    | ADD64924         |
| A/swine/IL/10-001551-1/2009(H1N1)     | 12/20/09    | ADD64928         |
| A/swine/IL/10-001551-2/2009(H1N1)     | 12/20/09    | ADD64932         |
| A/swine/IL/12660/2010(H1N1)           | 2/23/10     | ADG85221         |
| A/swine/IL/17315-1/2010(H1N1)         | 3/18/10     | ADG85241         |
| A/swine/IL/17315-3/2010(H1N1)         | 3/18/10     | ADG85245         |
| A/swine/IL/25399-2/2010(H1N1)         | 5/18/10     | ADN95952         |
| A/swine/IL/25399-3/2010(H1N1)         | 5/18/10     | ADN95956         |
| A/swine/IL/25399-4/2010(H1N1)         | 5/18/10     | ADN95960         |
| A/swine/IL/27486-1/2010(H1N1)         | 6/2/10      | ADN95964         |
| A/swine/IL/27486-2/2010(H1N1)         | 6/2/10      | ADN95968         |
| A/swine/IL/32974/2009(H1N1)           | 11/11/09    | ADB82958         |
| A/swine/IL/35572/2009(H1N1)           | 12/16/09    | ADD64916         |
| A/swine/IL/35573/2009(H1N1)           | 12/16/09    | ADD64920         |
| A/swine/IL/3910/2010(H1N1)            | 1/11/10     | ADD37828         |
| A/swine/IL/5265-1/2010(H1N1)          | 1/25/10     | ADD64936         |

|                                       |          |          |
|---------------------------------------|----------|----------|
| A/swine/IL/5265-2/2010(H1N1)          | 1/25/10  | ADD64940 |
| A/swine/Illinois/02957/2010(H1N1)     | 1/26/10  | ADC79610 |
| A/swine/Illinois/A01047061/2010(H1N1) | 11/29/10 | AFN07832 |
| A/swine/Illinois/A01047715/2010(H1N1) | 12/14/10 | AFN07902 |
| A/swine/Illinois/A01047796/2010(H1N1) | 12/30/10 | AFN07912 |
| A/swine/Illinois/A01047800/2010(H1N1) | 12/30/10 | AFL56780 |
| A/swine/Illinois/A01047977/2011(H1N1) | 1/17/11  | AFN08630 |
| A/swine/Illinois/A01049574/2011(H1N1) | 2/16/11  | AEP17263 |
| A/swine/Illinois/A01049575/2011(H1N1) | 2/16/11  | AEZ54162 |
| A/swine/Illinois/A01049673/2011(H1N1) | 3/10/11  | AEP17264 |
| A/swine/Illinois/A01076118/2010(H1N1) | 7/13/10  | AFL56782 |
| A/swine/Illinois/A01076175/2009(H1N1) | 11/22/09 | AFN07978 |
| A/swine/Illinois/A01076179/2009(H1N1) | 12/6/09  | AFL56814 |
| A/swine/Illinois/A01076194/2010(H1N1) | 2/21/10  | AFH76960 |
| A/swine/Illinois/A01076203/2010(H1N1) | 4/11/10  | AFH76961 |
| A/swine/Illinois/A01076907/2010(H1N1) | 11/1/10  | AFH76962 |
| A/swine/Illinois/A01076948/2010(H1N1) | 11/11/10 | AFN07806 |
| A/swine/Illinois/A01116954/2011(H1N1) | 11/10/11 | AFJ19067 |
| A/swine/Illinois/A01134200/2011(H1N1) | 1/26/11  | AFN08338 |
| A/swine/Illinois/A01134201/2011(H1N1) | 1/26/11  | AFH76963 |
| A/swine/Illinois/A01134329/2011(H1N1) | 2/7/11   | AFN08444 |
| A/swine/Illinois/A01134451/2011(H1N1) | 2/14/11  | AFN08462 |
| A/swine/Illinois/A01134459/2011(H1N1) | 2/18/11  | AFN08472 |
| A/swine/Illinois/A01134559/2011(H1N1) | 2/24/11  | AFN08512 |
| A/swine/Illinois/A01134671/2011(H1N1) | 3/7/11   | AFN08558 |
| A/swine/Illinois/A01134706/2011(H1N1) | 3/10/11  | AFN08572 |
| A/swine/Illinois/A01134707/2011(H1N1) | 3/10/11  | AFH76966 |
| A/swine/Illinois/A01134711/2011(H1N1) | 3/10/11  | AFN08578 |
| A/swine/Illinois/A01134723/2011(H1)   | 3/10/11  | AFM78666 |
| A/swine/Illinois/A01134883/2011(H1N1) | 3/23/11  | AFN08634 |
| A/swine/Illinois/A01327211/2010(H1N1) | 10/7/10  | AFQ60233 |



|                                       |          |          |
|---------------------------------------|----------|----------|
| A/swine/Illinois/A01395201/2013(H1N1) | 11/18/13 | AHF20501 |
| A/swine/Illinois/A01397807/2013(H1N1) | 7/10/13  | AGU01919 |
| A/swine/Illinois/A01398316/2013(H1N1) | 7/23/13  | AGU69947 |
| A/swine/Illinois/A01398610/2013(H1N1) | 8/9/13   | AGW83306 |
| A/swine/Illinois/A01398628/2013(H1N1) | 8/9/13   | AGW83314 |
| A/swine/Illinois/A01411340/2014(H1N1) | 2014/01  | AHL21519 |
| A/swine/Illinois/A01411419/2014(H1N1) | 2014/02  | AHM24139 |
| A/swine/Illinois/A01490609/2014(H1N1) | 1/8/14   | AHJ57442 |
| A/swine/Illinois/A01492501/2014(H1N1) | 2/12/14  | AHN19438 |
| A/swine/Illinois/A01493472/2014(H1N1) | 3/26/14  | AHY84443 |
| A/swine/IN/17311/2010(H1N1)           | 3/17/10  | ADG85233 |
| A/swine/Indiana/13/2011(H1N1)         | 2011/06  | AEW46960 |
| A/swine/Indiana/27007/2009(H1N1)      | 2009     | ADB66685 |
| A/swine/Indiana/A01049247/2010(H1N1)  | 12/8/10  | AEI87822 |
| A/swine/Indiana/A01076195/2010(H1N1)  | 2/28/10  | AFL56792 |
| A/swine/Indiana/A01327232/2010(H1N1)  | 3/4/10   | AFQ60237 |
| A/swine/Indiana/A01327233/2010(H1N1)  | 9/21/10  | AFQ60245 |
| A/swine/Iowa/A01049003/2010(H1N1)     | 11/15/10 | AEC23322 |
| A/swine/Iowa/A01049004/2010(H1N1)     | 11/15/10 | AEC23323 |
| A/swine/Iowa/A01049037/2010(H1N1)     | 11/16/10 | AEC23329 |
| A/swine/Iowa/A01049077/2010(H1N1)     | 11/17/10 | AEC23338 |
| A/swine/Iowa/A01049195/2010(H1N1)     | 12/1/10  | AFM46517 |
| A/swine/Iowa/A01049205/2010(H1N1)     | 12/3/10  | AFM46518 |
| A/swine/Iowa/A01049239/2010(H1N1)     | 12/8/10  | AEI87819 |
| A/swine/Iowa/A01049379/2011(H1N1)     | 1/3/11   | AEI87829 |
| A/swine/Iowa/A01049478/2011(H1N1)     | 1/27/11  | AEP17262 |
| A/swine/Iowa/A01202097/2011(H1N1)     | 6/21/11  | AFM46638 |
| A/swine/Iowa/A01202099/2011(H1N1)     | 6/21/11  | AFM46639 |
| A/swine/Iowa/A01202511/2011(H1N1)     | 8/11/11  | AFM46660 |
| A/swine/Iowa/A01202554/2011(H1N1)     | 8/30/11  | AFM46663 |
| A/swine/Iowa/A01202834/2011(H1N1)     | 11/14/11 | AFM46860 |

|                                        |          |          |
|----------------------------------------|----------|----------|
| A/swine/lowa/A01202853/2011(H1N1)      | 11/15/11 | AFM46863 |
| A/swine/lowa/A01202854/2011(H1N1)      | 11/15/11 | AFM46864 |
| A/swine/lowa/A01202918/2011(H1N1)      | 11/29/11 | AFM46999 |
| A/swine/lowa/A01410472/2014(H1N1)      | 3/3/14   | AHY95066 |
| A/swine/lowa/A01432960/2013(H1N1)      | 2013/08  | AGW25666 |
| A/swine/Kansas/A01377299/2014(H1N1)    | 4/30/14  | AID48017 |
| A/swine/Kansas/A01410327/2014(H1N1)    | 2/7/14   | AHW46677 |
| A/swine/Kentucky/A01134742/2011(H1N1)  | 2/27/11  | AFN08508 |
| A/swine/Minnesota/02976/2010(H1N1)     | 1/12/10  | ADD22553 |
| A/swine/Minnesota/02979/2010(H1N1)     | 2/17/10  | ADD22552 |
| A/swine/Minnesota/0432/2010(H1N1)      | 2/10/10  | AEV21634 |
| A/swine/Minnesota/074A/2009(H1N1)      | 8/26/09  | ADU85803 |
| A/swine/Minnesota/130A/2009(H1N1)      | 9/1/09   | ADU85804 |
| A/swine/Minnesota/136B/2009(H1N1)      | 8/31/09  | ADU85806 |
| A/swine/Minnesota/165A/2009(H1N1)      | 8/28/09  | ADU85808 |
| A/swine/Minnesota/54354/2010(H1N1)     | 10/27/10 | ADQ54383 |
| A/swine/Minnesota/A01047907/2010(H1N1) | 12/6/10  | AFN07894 |
| A/swine/Minnesota/A01049347/2010(H1N1) | 12/29/10 | AEI87827 |
| A/swine/Minnesota/A01049428/2011(H1N1) | 1/18/11  | AEI87830 |
| A/swine/Minnesota/A01076111/2010(H1N1) | 7/6/10   | AFM47136 |
| A/swine/Minnesota/A01076112/2010(H1N1) | 7/6/10   | AFL56781 |
| A/swine/Minnesota/A01076209/2010(H1N2) | 5/2/10   | AFI62131 |
| A/swine/Minnesota/A01134649/2011(H1N1) | 2/23/11  | AFH76977 |
| A/swine/Minnesota/A01134650/2011(H1N1) | 2/23/11  | AFN08500 |
| A/swine/Minnesota/A01134815/2011(H1N1) | 3/18/11  | AFH76978 |
| A/swine/Minnesota/A01134821/2011(H1N1) | 3/18/11  | AFN08618 |
| A/swine/Minnesota/A01134826/2011(H1N1) | 3/18/11  | AFN08610 |
| A/swine/Minnesota/A01134830/2011(H1N1) | 3/18/11  | AFH76979 |
| A/swine/Minnesota/A01134836/2011(H1N1) | 3/18/11  | AFN08604 |
| A/swine/Minnesota/A01134843/2011(H1N1) | 3/18/11  | AFM78674 |
| A/swine/Minnesota/A01201202/2011(H1N1) | 4/21/11  | AFN08166 |

|                                        |          |          |
|----------------------------------------|----------|----------|
| A/swine/Minnesota/A01201605/2011(H1N1) | 5/17/11  | AFN08188 |
| A/swine/Minnesota/A01328420/2012(H1N1) | 5/14/12  | AFU09052 |
| A/swine/Minnesota/A01381276/2013(H1N1) | 5/23/13  | AGO86678 |
| A/swine/Minnesota/A01392911/2013(H1N1) | 10/10/13 | AHA57090 |
| A/swine/Minnesota/A01491447/2014(H1N1) | 1/27/14  | AHL21454 |
| A/swine/Minnesota/A01491451/2014(H1N1) | 1/27/14  | AHL21446 |
| A/swine/Minnesota/A01491464/2014(H1N1) | 1/27/14  | AHL21434 |
| A/swine/Minnesota/A01491704/2014(H1N1) | 2/4/14   | AHM24113 |
| A/swine/Minnesota/A01076188/2010(H1N1) | 1/24/10  | AFL56789 |
| A/swine/Missouri/A01203163/2012(H1N1)  | 1/17/12  | AFM47013 |
| A/swine/Missouri/A01492887/2014(H1N1)  | 2/10/14  | AHY20810 |
| A/swine/MN/25618/2011(H1N1)            | 2/10/11  | AEJ90184 |
| A/swine/MN/8761/2010(H1N1)             | 2/16/10  | ADD64944 |
| A/swine/MN/8762-1/2010(H1N1)           | 2/16/10  | ADD64948 |
| A/swine/MN/8762-2/2010(H1N1)           | 2/16/10  | ADD64952 |
| A/swine/MO/15534/2010(H1N1)            | 3/24/10  | ADG85229 |
| A/swine/MO/17314/2010(H1N1)            | 3/31/10  | ADG85237 |
| A/swine/MO/23881/2010(H1N1)            | 4/29/10  | ADN95948 |
| A/swine/NC/13598/2010(H1N1)            | 3/9/10   | ADG85225 |
| A/swine/NC/19646/2010(H1N1)            | 4/20/10  | ADG85249 |
| A/swine/NC/34543/2009(H1N1)            | 11/24/09 | ADB82962 |
| A/swine/NC/34752/2009(H1N1)            | 12/14/09 | ADB82966 |
| A/swine/Nebraska/A01047438/2010(H1N1)  | 11/11/10 | AFN07872 |
| A/swine/Nebraska/A01049048/2010(H1N1)  | 11/17/10 | AEC23331 |
| A/swine/Nebraska/A01116986/2010(H1N1)  | 11/11/10 | AFN07782 |
| A/swine/Nebraska/A01203626/2012(H1N2)  | 7/12/12  | AFP99690 |
| A/swine/Nebraska/A01241113/2012(H1N1)  | 1/10/12  | AFU08592 |
| A/swine/Nebraska/A01366774/2014(H1N1)  | 1/17/14  | AHJ57470 |
| A/swine/Nebraska/A01491300/2014(H1N1)  | 1/27/14  | AHL21442 |
| A/swine/Nebraska/A01491382/2014(H1N1)  | 1/27/14  | AHL21430 |
| A/swine/Nebraska/A01491508/2014(H1N1)  | 1/30/14  | AHM24121 |

|                                             |          |          |
|---------------------------------------------|----------|----------|
| A/swine/Nebraska/A01492657/2014(H1N1)       | 2/27/14  | AHW46540 |
| A/swine/Nebraska/A01509523/2014(H1N1)       | 4/24/14  | AIB06034 |
| A/swine/North Carolina/A01049163/2010(H1N1) | 11/30/10 | AEF33065 |
| A/swine/North Carolina/A01049173/2010(H1N1) | 11/30/10 | AEF33067 |
| A/swine/North Carolina/A01049174/2010(H1N1) | 11/30/10 | AEF33068 |
| A/swine/North Carolina/A01076176/2009(H1N1) | 11/29/09 | AFL56786 |
| A/swine/North Carolina/A01076184/2010(H1N2) | 1/3/10   | AFN07990 |
| A/swine/North Carolina/A01076189/2010(H1N1) | 1/31/10  | AFL56790 |
| A/swine/North Carolina/A01076198/2010(H1N1) | 3/14/10  | AFL56794 |
| A/swine/North Carolina/A01076213/2010(H1N1) | 6/27/10  | AFH76982 |
| A/swine/North Carolina/A01202450/2011(H1N1) | 7/14/11  | AFM46650 |
| A/swine/North Carolina/A01202451/2011(H1N1) | 7/14/11  | AFM46651 |
| A/swine/North Carolina/A01241246/2012(H1N1) | 1/3/12   | AFU08968 |
| A/swine/North Carolina/A01410573/2014(H1N1) | 3/21/14  | AHZ65729 |
| A/swine/OH/9838/2011(H1N1)                  | 2/21/11  | AEF28999 |
| A/swine/Ohio/A01134769/2011(H1N1)           | 8/3/11   | AFN08562 |
| A/swine/Ohio/A01201432/2011(H1N1)           | 3/22/11  | AFN08626 |
| A/swine/Ohio/A01349888/2013(H1N1)           | 4/15/13  | AGM53833 |
| A/swine/Ohio/A01349920/2013(H1N1)           | 4/16/13  | AGM53837 |
| A/swine/Ohio/A01349978/2013(H1N1)           | 4/17/13  | AGM53841 |
| A/swine/Ohio/A01432602/2013(H1N1)           | 2013/04  | AGK62675 |
| A/swine/Oklahoma/02989/2010(H1N1)           | 3/12/10  | AHB24442 |
| A/swine/OR/A00700068/2011(H1N1)             | 5/18/11  | AEJ90188 |
| A/swine/Pennsylvania/A01134526/2011(H1N1)   | 2/14/11  | AFN08466 |
| A/swine/South Dakota/A01201469/2011(H1N1)   | 5/9/11   | AFH76984 |
| A/swine/South Dakota/A01201470/2011(H1N1)   | 5/9/11   | AFN08176 |
| A/swine/Texas/A01104003/2011(H1N1)          | 7/16/11  | AEP33167 |
| A/swine/Texas/A01104004/2011(H1N1)          | 7/16/11  | AEP33157 |
| A/swine/Virginia/A01432745/2013(H1N2)       | 2013/05  | AGS08949 |
| A/Alabama/01/2010                           | 1/4/10   | KC781903 |
| A/Alabama/01/2012                           | 1/6/12   | KC891323 |

|                     |          |          |
|---------------------|----------|----------|
| A/Alabama/02/2011   | 1/4/11   | KC882232 |
| A/Alabama/04/2013   | 2/25/13  | KF647918 |
| A/Alabama/06/2012   | 3/19/12  | KC891425 |
| A/Alabama/3484/2013 | 11/5/13  | CY163472 |
| A/Alabama/3525/2013 | 12/17/13 | CY187193 |
| A/Alabama/3716/2014 | 2/6/14   | CY187634 |
| A/Alabama/3717/2014 | 2/27/14  | CY187635 |
| A/Alabama/3718/2014 | 3/19/14  | CY187636 |
| A/Alaska/01/2010    | 2/7/10   | KC781389 |
| A/Alaska/07/2011    | 1/24/11  | KC881752 |
| A/Alaska/08/2011    | 1/14/11  | KC881746 |
| A/Alaska/11/2011    | 3/9/11   | KC881807 |
| A/Alaska/3526/2014  | 1/7/14   | CY187194 |
| A/Alaska/36/2012    | 12/28/12 | KF648140 |
| A/Alaska/3720/2014  | 2/14/14  | CY187638 |
| A/Alaska/3721/2014  | 2/14/14  | CY187639 |
| A/Alaska/43/2009    | 11/10/09 | KC781688 |
| A/Arizona/01/2010   | 1/16/10  | KC781245 |
| A/Arizona/01/2013   | 1/14/13  | KF648049 |
| A/Arizona/03/2010   | 3/6/10   | KC780610 |
| A/Arizona/03/2014   | 2/16/14  | 531902   |
| A/Arizona/05/2010   | 5/11/10  | KC780324 |
| A/Arizona/07/2010   | 4/9/10   | KC780122 |
| A/Arizona/08/2012   | 1/24/12  | KC891234 |
| A/Arizona/16/2009   | 9/15/09  | KC781533 |
| A/Arizona/3530/2014 | 1/7/14   | CY187198 |
| A/Arizona/3722/2014 | 1/25/14  | CY187640 |
| A/Arizona/M1/2012   | 2/23/12  | KC508624 |
| A/Arizona/M15/2012  | 4/3/12   | KC513480 |
| A/Arizona/M17/2012  | 4/4/12   | KC513478 |
| A/Arizona/M2/2012   | 2/29/12  | KC508625 |

|                         |          |          |
|-------------------------|----------|----------|
| A/Arizona/M20/2012      | 4/13/12  | KJ411983 |
| A/Arizona/M6/2012       | 3/10/12  | KC513481 |
| A/Boston/653/2009       | 11/13/09 | CY075556 |
| A/Boston/DOA08/2011     | 1/13/11  | CY134465 |
| A/Boston/DOA2/099/2012  | 12/23/12 | CY148316 |
| A/Boston/DOA26/2011     | 2/3/11   | CY111538 |
| A/Boston/DOA28/2011     | 1/27/11  | CY134473 |
| A/Boston/DOA30/2011     | 1/27/11  | CY134489 |
| A/Boston/DOA34/2011     | 2/7/11   | CY134497 |
| A/Boston/DOA35/2011     | 2/7/11   | CY111278 |
| A/Boston/DOA39/2011     | 2/12/11  | CY134521 |
| A/Boston/DOA40/2011     | 2/11/11  | CY111286 |
| A/Boston/DOA43/2011     | 2/14/11  | CY134537 |
| A/Boston/DOA53/2011     | 2/21/11  | CY134585 |
| A/Boston/DOA70/2011     | 3/3/11   | CY111374 |
| A/Boston/DOA90/2012     | 2/21/12  | CY125775 |
| A/Boston/DOA93/2012     | 3/26/12  | CY125783 |
| A/Boston/YGA/01041/2012 | 12/25/12 | CY168807 |
| A/Boston/YGA/01050/2012 | 12/26/12 | CY168879 |
| A/Boston/YGA/01218/2013 | 3/18/13  | CY170087 |
| A/Boston/YGA/01220/2013 | 4/26/13  | CY170095 |
| A/Brawley/WR1636P/2009  | 4/29/09  | CY073402 |
| A/Bronx/INS3/673/2012   | 3/6/12   | CY176690 |
| A/Bronx/INS3/674/2012   | 3/21/12  | CY176698 |
| A/Brownsville/34OS/2009 | 5/23/09  | CY053222 |
| A/Brownsville/43H/2009  | 6/2/09   | CY053301 |
| A/California/01/2010    | 1/19/10  | KC782067 |
| A/California/02/2010    | 2/1/10   | KC780601 |
| A/California/06/2011    | 1/17/11  | KC881612 |
| A/California/07/2010    | 4/23/10  | KC780214 |
| A/California/09/2010    | 5/11/10  | KC782239 |

|                        |          |          |
|------------------------|----------|----------|
| A/California/09/2013   | 1/22/13  | KF648256 |
| A/California/11/2009   | 4/24/09  | GQ160579 |
| A/California/11/2010   | 7/9/10   | KC781195 |
| A/California/12/2009   | 4/22/09  | GQ160606 |
| A/California/12/2012   | 1/19/12  | KC891446 |
| A/California/13/2009   | 4/21/09  | GQ160607 |
| A/California/15/2011   | 2/9/11   | KC882188 |
| A/California/19/2012   | 2/14/12  | KC891084 |
| A/California/19/2013   | 3/9/13   | KF648198 |
| A/California/20/2011   | 2/21/11  | KC882290 |
| A/California/21/2013   | 5/3/13   | KF648229 |
| A/California/22/2010   | 10/29/10 | KC882111 |
| A/California/24/2013   | 8/8/13   | KF648169 |
| A/California/25/2012   | 3/30/12  | KC891437 |
| A/California/31/2010   | 12/8/10  | KC882173 |
| A/California/32/2011   | 11/16/11 | KC891210 |
| A/California/33/2012   | 5/1/12   | KC891313 |
| A/California/3311/2013 | 1/29/13  | CY147203 |
| A/California/3505/2013 | 12/3/13  | CY163493 |
| A/California/3532/2013 | 12/24/13 | CY187200 |
| A/California/3535/2013 | 12/29/13 | CY187203 |
| A/California/3537/2013 | 12/31/13 | CY187205 |
| A/California/3539/2014 | 1/2/14   | CY187207 |
| A/California/3540/2014 | 1/3/14   | CY187208 |
| A/California/3541/2014 | 1/4/14   | CY187209 |
| A/California/3542/2014 | 1/4/14   | CY187210 |
| A/California/3543/2014 | 1/6/14   | CY187211 |
| A/California/3544/2014 | 1/6/14   | CY187212 |
| A/California/3545/2014 | 1/30/14  | CY187213 |
| A/California/3546/2014 | 1/16/14  | CY187214 |
| A/California/3547/2014 | 1/16/14  | CY187215 |

|                              |          |          |
|------------------------------|----------|----------|
| A/California/3548/2013       | 12/12/13 | CY187216 |
| A/California/3723/2014       | 1/22/14  | CY187641 |
| A/California/3724/2014       | 1/26/14  | CY187642 |
| A/California/3725/2014       | 1/24/14  | CY187643 |
| A/California/3726/2014       | 2/2/14   | CY187644 |
| A/California/44/2012         | 10/19/12 | KF647927 |
| A/California/52/2011         | 12/28/11 | KC891325 |
| A/California/NHRC0001/2011   | 1/28/11  | CY092880 |
| A/California/NHRC414615/2013 | 12/4/13  | KJ538506 |
| A/California/NHRC417252/2013 | 12/23/13 | KJ635904 |
| A/California/NHRC418267/2014 | 1/6/14   | KJ635898 |
| A/California/NHRC418270/2013 | 12/30/13 | KJ635914 |
| A/California/NHRC419631/2014 | 1/14/14  | KJ889264 |
| A/California/NHRC419698/2014 | 1/16/14  | KJ889266 |
| A/California/NHRC420942/2014 | 1/12/14  | KJ889276 |
| A/California/NHRC421018/2014 | 1/17/14  | KJ889268 |
| A/California/NHRC423502/2014 | 1/28/14  | KM186099 |
| A/California/NHRC423907/2014 | 1/29/14  | KJ889258 |
| A/California/VRDL101/2009    | 11/5/09  | CY063163 |
| A/California/VRDL5/2010      | 2/4/10   | CY066479 |
| A/California/VRDL76/2009     | 9/21/09  | CY055510 |
| A/California/VRDL78/2009     | 9/22/09  | CY055518 |
| A/California/VRDL81/2009     | 10/1/09  | CY062210 |
| A/Chicago/WRAIR1691P/2009    | 10/14/09 | CY083495 |
| A/Chicago/YGA/04019/2012     | 12/7/12  | CY171159 |
| A/Chicago/YGA/04123/2012     | 12/30/12 | CY171543 |
| A/Colorado/01/2012           | 1/4/12   | KC891384 |
| A/Colorado/02/2011           | 1/24/11  | KC881890 |
| A/Colorado/03/2010           | 2/1/10   | KC780290 |
| A/Colorado/03/2013           | 3/23/13  | KF648001 |
| A/Colorado/05/2011           | 3/8/11   | KC882123 |



|                         |          |          |
|-------------------------|----------|----------|
| A/Colorado/07/2014      | 3/25/14  | 534013   |
| A/Colorado/11/2010      | 12/29/10 | KC882366 |
| A/Colorado/12/2012      | 3/21/12  | KC891346 |
| A/Colorado/14/2012      | 3/28/12  | KC891306 |
| A/Colorado/17/2009      | 12/9/09  | KC780199 |
| A/Colorado/3481/2013    | 11/5/13  | CY163469 |
| A/Colorado/3514/2013    | 12/9/13  | CY163502 |
| A/Colorado/3552/2013    | 12/19/13 | CY187220 |
| A/Colorado/3555/2014    | 1/2/14   | CY187223 |
| A/Colorado/3556/2013    | 12/30/13 | CY187224 |
| A/Colorado/3558/2014    | 1/2/14   | CY187226 |
| A/Colorado/3559/2014    | 1/7/14   | CY187227 |
| A/Colorado/3560/2014    | 1/7/14   | CY187228 |
| A/Colorado/3561/2013    | 12/10/13 | CY187229 |
| A/Colorado/3562/2013    | 12/11/13 | CY187230 |
| A/Colorado/3563/2013    | 12/17/13 | CY187231 |
| A/Connecticut/02/2013   | 7/6/13   | KF648018 |
| A/Connecticut/03/2010   | 5/6/10   | KC781157 |
| A/Connecticut/07/2010   | 12/14/10 | KC882251 |
| A/Connecticut/08/2011   | 4/2/11   | KC882192 |
| A/Connecticut/3728/2014 | 1/22/14  | CY187646 |
| A/Dayton/INS3/676/2012  | 3/12/12  | CY176714 |
| A/Delaware/01/2012      | 1/22/12  | KC891455 |
| A/Delaware/02/2010      | 2/11/10  | KC780350 |
| A/Delaware/03/2010      | 3/26/10  | KC781422 |
| A/Delaware/03/2012      | 2/12/12  | KC891503 |
| A/Delaware/03/2012      | 2/12/12  | KC891573 |
| A/Delaware/04/2011      | 2/4/11   | KC882419 |
| A/Delaware/07/2009      | 4/28/09  | GQ338355 |
| A/Delaware/08/2010      | 12/7/10  | KC882170 |
| A/Delaware/08/2011      | 2/12/11  | KC882398 |

|                                       |          |          |
|---------------------------------------|----------|----------|
| A/Delaware/08/2014                    | 3/31/14  | 531843   |
| A/Delaware/3566/2014                  | 1/13/14  | CY187234 |
| A/Delaware/3730/2014                  | 1/21/14  | CY187648 |
| A/District of Columbia/3731/2014      | 1/24/14  | CY187649 |
| A/District of Columbia/INS19/2009     | 10/27/09 | CY056052 |
| A/District of Columbia/INS21/2009     | 10/30/09 | CY056068 |
| A/District of Columbia/INS601/2011    | 1/13/11  | CY129878 |
| A/District of Columbia/WRAIR0304/2010 | 12/24/10 | CY097805 |
| A/District of Columbia/WRAIR0310/2010 | 8/27/10  | CY097845 |
| A/District of Columbia/WRAIR0313/2011 | 1/1/11   | CY097860 |
| A/Florida/01/2012                     | 1/3/12   | KC891364 |
| A/Florida/02/2010                     | 2/2/10   | KC780537 |
| A/Florida/02/2013                     | 1/23/13  | KF648138 |
| A/Florida/04/2010                     | 3/18/10  | KC781275 |
| A/Florida/06/2012                     | 2/27/12  | JX905426 |
| A/Florida/07/2013                     | 2/26/13  | KF647967 |
| A/Florida/07/2014                     | 1/9/14   | 504775   |
| A/Florida/09/2014                     | 1/15/14  | 508461   |
| A/Florida/10/2013                     | 3/11/13  | KF648124 |
| A/Florida/11/2013                     | 3/13/13  | KF648153 |
| A/Florida/12/2011                     | 3/15/11  | KC881663 |
| A/Florida/13/2012                     | 4/3/12   | KC891222 |
| A/Florida/14/2014                     | 3/4/14   | 516341   |
| A/Florida/15/2010                     | 8/10/10  | KC882063 |
| A/Florida/15/2012                     | 5/1/12   | KC891395 |
| A/Florida/17/2013                     | 5/7/13   | KF647953 |
| A/Florida/18/2013                     | 6/15/13  | KF648022 |
| A/Florida/19/2013                     | 7/2/13   | KF647957 |
| A/Florida/20/2013                     | 7/7/13   | KF648020 |
| A/Florida/3076/2012                   | 12/7/12  | CY134632 |
| A/Florida/3077/2012                   | 12/13/12 | CY134633 |

|                       |          |          |
|-----------------------|----------|----------|
| A/Florida/3078/2012   | 12/12/12 | CY134634 |
| A/Florida/34/2011     | 12/7/11  | KC891250 |
| A/Florida/3483/2013   | 11/5/13  | CY163471 |
| A/Florida/3485/2013   | 11/5/13  | CY163473 |
| A/Florida/3492/2013   | 12/4/13  | CY163480 |
| A/Florida/35/2011     | 12/7/11  | KC891202 |
| A/Florida/3502/2013   | 12/4/13  | CY163490 |
| A/Florida/3519/2013   | 12/12/13 | CY163507 |
| A/Florida/3567/2013   | 12/30/13 | CY187235 |
| A/Florida/3568/2014   | 1/5/14   | CY187236 |
| A/Florida/3569/2013   | 12/20/13 | CY187237 |
| A/Florida/3599/2013   | 12/20/13 | CY187267 |
| A/Florida/36/2011     | 12/20/11 | KC891263 |
| A/Florida/38/2012     | 8/25/12  | KF648071 |
| A/Florida/57/2012     | 12/12/12 | KF647994 |
| A/Gainesville/03/2014 | 1/12/14  | KJ645782 |
| A/Gainesville/04/2014 | 1/13/14  | KJ645783 |
| A/Gainesville/05/2014 | 1/15/14  | KJ645769 |
| A/Gainesville/06/2014 | 1/19/14  | KJ645784 |
| A/Gainesville/07/2014 | 2/7/14   | KJ645785 |
| A/Gainesville/08/2013 | 12/4/13  | KJ645761 |
| A/Gainesville/10/2013 | 12/30/13 | KJ645781 |
| A/Georgia/01/2009     | 4/27/09  | GQ200237 |
| A/Georgia/02/2011     | 3/5/11   | KC881676 |
| A/Georgia/03/2012     | 1/29/12  | KC891492 |
| A/Georgia/06/2012     | 2/24/12  | KC891251 |
| A/Georgia/07/2012     | 3/5/12   | KC891289 |
| A/Georgia/08/2012     | 3/7/12   | KC891291 |
| A/Georgia/11/2010     | 3/19/10  | KC781240 |
| A/Hawaii/01/2010      | 1/3/10   | KC781238 |
| A/Hawaii/04/2014      | 2/23/14  | 534028   |

|                    |          |          |
|--------------------|----------|----------|
| A/Hawaii/05/2011   | 9/7/11   | JX905420 |
| A/Hawaii/06/2014   | 3/1/14   | 531937   |
| A/Hawaii/07/2010   | 5/4/10   | KC780101 |
| A/Hawaii/08/2010   | 4/12/10  | KC782250 |
| A/Hawaii/16/2010   | 10/5/10  | KC882108 |
| A/Hawaii/19/2010   | 9/15/10  | KC882179 |
| A/Hawaii/3312/2013 | 1/30/13  | CY147204 |
| A/Hawaii/3740/2014 | 1/24/14  | CY187658 |
| A/Hawaii/3741/2014 | 1/24/14  | CY187659 |
| A/Hawaii/3742/2014 | 1/24/14  | CY187660 |
| A/Hawaii/3743/2014 | 1/24/14  | CY187661 |
| A/Hawaii/47/2012   | 12/16/12 | KF648144 |
| A/Idaho/02/2014    | 1/7/14   | 509470   |
| A/Idaho/03/2012    | 1/27/12  | KC891461 |
| A/Idaho/04/2013    | 2/8/13   | KF647968 |
| A/Idaho/05/2012    | 1/31/12  | KC891075 |
| A/Idaho/07/2012    | 2/18/12  | KC891248 |
| A/Idaho/14/2012    | 4/8/12   | KC891184 |
| A/Idaho/15/2012    | 4/18/12  | KC891392 |
| A/Idaho/15/2012    | 4/18/12  | KC891393 |
| A/Idaho/16/2012    | 5/1/12   | KC891391 |
| A/Idaho/3577/2014  | 1/14/14  | CY187245 |
| A/Idaho/3744/2014  | 1/10/14  | CY187662 |
| A/Illinois/01/2012 | 1/25/12  | KC891566 |
| A/Illinois/01/2014 | 1/4/14   | 510154   |
| A/Illinois/03/2012 | 4/16/12  | KC891556 |
| A/Illinois/03/2012 | 4/16/12  | KC891193 |
| A/Illinois/04/2012 | 2/29/12  | KC891179 |
| A/Illinois/05/2012 | 3/2/12   | KC891138 |
| A/Illinois/05/2012 | 3/2/12   | KC891047 |
| A/Illinois/06/2012 | 3/8/12   | KC891135 |

|                            |          |          |
|----------------------------|----------|----------|
| A/Illinois/07/2012         | 3/12/12  | KC891050 |
| A/Illinois/18/2009         | 9/24/09  | KC782335 |
| A/Illinois/3578/2013       | 12/23/13 | CY187246 |
| A/Illinois/3580/2013       | 12/16/13 | CY187248 |
| A/Illinois/3581/2013       | 12/16/13 | CY187249 |
| A/Illinois/NHRC392784/2013 | 2/4/13   | KF886304 |
| A/Illinois/NHRC414454/2013 | 11/25/13 | KJ538530 |
| A/Illinois/NHRC414456/2013 | 11/25/13 | KJ538510 |
| A/Illinois/NHRC415712/2013 | 12/12/13 | KJ538494 |
| A/Illinois/NHRC415715/2013 | 12/12/13 | KJ538522 |
| A/Illinois/NHRC417104/2013 | 12/17/13 | KJ635900 |
| A/Indiana/02/2012          | 3/2/12   | KC891320 |
| A/Indiana/12/2013          | 7/3/13   | KF648044 |
| A/Indiana/167/2012         | 11/25/12 | KF648005 |
| A/Indore/2683/2013         | 7/3/13   | KF886296 |
| A/Iowa/01/2010             | 1/5/10   | KC782014 |
| A/Iowa/01/2011             | 1/5/11   | KC881758 |
| A/Iowa/09/2012             | 3/17/12  | KC891176 |
| A/Iowa/11/2012             | 4/12/12  | KC891228 |
| A/Iowa/12/2012             | 4/14/12  | KC891187 |
| A/Kansas/02/2011           | 1/19/11  | KC881760 |
| A/Kansas/07/2011           | 3/1/11   | KC882037 |
| A/Kansas/07/2012           | 3/13/12  | KC891242 |
| A/Kansas/20/2009           | 9/14/09  | KC780830 |
| A/Kansas/3582/2014         | 1/9/14   | CY187250 |
| A/Kansas/3583/2014         | 1/14/14  | CY187251 |
| A/Kansas/3768/2014         | 1/28/14  | CY187686 |
| A/Kentucky/01/2010         | 1/14/10  | KC780235 |
| A/Kentucky/02/2010         | 1/25/10  | KC780426 |
| A/Kentucky/03/2010         | 2/19/10  | KC781197 |
| A/Kentucky/03/2012         | 2/10/12  | KC891087 |

|                           |          |          |
|---------------------------|----------|----------|
| A/Kentucky/04/2013        | 3/30/13  | KF648039 |
| A/Kentucky/05/2009        | 4/30/09  | GQ232009 |
| A/Kentucky/08/2012        | 3/29/12  | KC891149 |
| A/Kentucky/180/2010       | 4/1/10   | JX875056 |
| A/Kentucky/23/2012        | 12/25/12 | KF648180 |
| A/Kentucky/3585/2013      | 12/27/13 | CY187253 |
| A/Kentucky/3590/2014      | 1/2/14   | CY187258 |
| A/Maryland/05/2011        | 1/24/11  | KC882349 |
| A/Maryland/06/2010        | 4/23/10  | KC781380 |
| A/Maryland/06/2014        | 1/18/14  | 515485   |
| A/Maryland/08/2014        | 2/21/14  | 531875   |
| A/Maryland/09/2014        | 3/8/14   | 531922   |
| A/Maryland/10/2012        | 2/14/12  | KC891063 |
| A/Maryland/12/2012        | 3/8/12   | KC891582 |
| A/Maryland/12/2014        | 4/22/14  | 536850   |
| A/Maryland/13/2012        | 4/1/12   | KC891219 |
| A/Maryland/21/2012        | 7/12/12  | KC891212 |
| A/Maryland/31/2009        | 11/9/09  | KC780794 |
| A/Maryland/31/2012        | 9/24/12  | KF648028 |
| A/Maryland/3603/2014      | 1/6/14   | CY187271 |
| A/Maryland/37/2012        | 11/8/12  | KF647941 |
| A/Maryland/3788/2014      | 1/31/14  | CY187706 |
| A/Massachusetts/01/2013   | 1/2/13   | KF648105 |
| A/Massachusetts/03/2010   | 9/2/10   | KC781236 |
| A/Massachusetts/05/2012   | 3/12/12  | KC891424 |
| A/Massachusetts/06/2009   | 4/26/09  | GQ117043 |
| A/Massachusetts/3604/2014 | 1/6/14   | CY187272 |
| A/Massachusetts/3605/2014 | 1/15/14  | CY187273 |
| A/Massachusetts/3789/2014 | 1/24/14  | CY187707 |
| A/Massachusetts/3790/2014 | 2/3/14   | CY187708 |
| A/Michigan/01/2010        | 1/27/10  | KC781448 |

|                             |          |          |
|-----------------------------|----------|----------|
| A/Michigan/01/2012          | 3/4/12   | KC891102 |
| A/Michigan/02/2010          | 2/24/10  | KC781258 |
| A/Michigan/02/2014          | 1/8/14   | 503830   |
| A/Michigan/03/2010          | 3/31/10  | KC781226 |
| A/Michigan/06/2010          | 7/27/10  | KC781416 |
| A/Minneapolis/INS3/675/2012 | 2/27/12  | CY176706 |
| A/Minnesota/01/2011         | 1/6/11   | KC881624 |
| A/Minnesota/03/2011         | 2/18/11  | KC881905 |
| A/Minnesota/03/2011         | 2/18/11  | KC881972 |
| A/Minnesota/03/2014         | 3/16/14  | 517091   |
| A/Minnesota/06/2012         | 3/20/12  | KC891341 |
| A/Minnesota/11/2011         | 4/19/11  | KC882184 |
| A/Minnesota/15/2010         | 12/5/10  | KC882165 |
| A/Minnesota/16/2012         | 10/29/12 | KF647920 |
| A/Minnesota/26/2012         | 12/13/12 | KF647996 |
| A/Minnesota/34/2012         | 12/20/12 | KF648182 |
| A/Mississippi/02/2010       | 3/8/10   | KC781863 |
| A/Mississippi/07/2011       | 2/23/11  | KC881679 |
| A/Mississippi/3313/2013     | 1/31/13  | CY147205 |
| A/Mississippi/3314/2013     | 3/4/13   | CY147206 |
| A/Mississippi/3477/2013     | 9/30/13  | CY163465 |
| A/Mississippi/3489/2013     | 11/5/13  | CY163477 |
| A/Mississippi/3511/2013     | 12/10/13 | CY163499 |
| A/Mississippi/3518/2013     | 12/11/13 | CY163506 |
| A/Mississippi/3608/2014     | 1/6/14   | CY187276 |
| A/Mississippi/3609/2014     | 1/6/14   | CY187277 |
| A/Mississippi/3611/2013     | 12/18/13 | CY187279 |
| A/Missouri/03/2011          | 3/9/11   | KC882295 |
| A/Missouri/03/2012          | 1/18/12  | KC891458 |
| A/Missouri/03/2013          | 2/5/13   | KF648253 |
| A/Missouri/03/2014          | 2/12/14  | 516438   |

|                            |          |          |
|----------------------------|----------|----------|
| A/Missouri/04/2012         | 2/6/12   | KC891029 |
| A/Missouri/05/2014         | 3/19/14  | 531867   |
| A/Missouri/NHRC419710/2014 | 1/10/14  | KJ889272 |
| A/Montana/01/2010          | 4/4/10   | KC782118 |
| A/Montana/02/2010          | 4/7/10   | KC782158 |
| A/Montana/06/2009          | 5/5/09   | GQ457511 |
| A/Montana/06/2011          | 3/3/11   | KC882199 |
| A/Montana/09/2012          | 3/26/12  | KC891225 |
| A/Montana/3612/2014        | 1/6/14   | CY187280 |
| A/Montana/3792/2014        | 1/22/14  | CY187710 |
| A/Nebraska/06/2011         | 1/20/11  | KC881598 |
| A/Nebraska/06/2012         | 2/9/12   | KC891474 |
| A/Nebraska/10/2012         | 8/9/12   | KC891308 |
| A/Nebraska/13/2011         | 2/25/11  | KC882322 |
| A/Nebraska/3613/2013       | 12/12/13 | CY187281 |
| A/Nebraska/3614/2013       | 12/12/13 | CY187282 |
| A/Nevada/06/2012           | 1/23/12  | KC891489 |
| A/Nevada/06/2013           | 7/23/13  | KF648120 |
| A/Nevada/11/2012           | 3/3/12   | KC891270 |
| A/Nevada/17/2012           | 4/4/12   | KC891161 |
| A/Nevada/3617/2013         | 12/30/13 | CY187285 |
| A/Nevada/3620/2013         | 12/17/13 | CY187288 |
| A/New Hampshire/01/2010    | 1/3/10   | KC780574 |
| A/New Hampshire/02/2010    | 2/19/10  | KC781923 |
| A/New Hampshire/03/2012    | 1/30/12  | KC891468 |
| A/New Hampshire/04/2014    | 1/31/14  | 515401   |
| A/New Hampshire/07/2012    | 3/10/12  | KC891443 |
| A/New Hampshire/07/2012    | 3/10/12  | KC891389 |
| A/New Hampshire/20/2012    | 11/24/12 | KF648010 |
| A/New Hampshire/21/2009    | 11/16/09 | KC781108 |
| A/New Hampshire/27/2009    | 12/1/09  | KC781111 |



|                              |          |          |
|------------------------------|----------|----------|
| A/New Jersey/01/2010         | 1/1/10   | KC780547 |
| A/New Jersey/02/2012         | 1/17/12  | KC891483 |
| A/New Jersey/03/2012         | 5/2/12   | KC891190 |
| A/New Jersey/04/2013         | 3/19/13  | KF648036 |
| A/New Jersey/05/2011         | 3/3/11   | KC881697 |
| A/New Jersey/07/2012         | 11/20/12 | KF648115 |
| A/New Jersey/11/2012         | 12/8/12  | KF648063 |
| A/New Jersey/3622/2014       | 1/10/14  | CY187290 |
| A/New Jersey/3793/2014       | 3/25/14  | CY187711 |
| A/New Jersey/NHRC403730/2013 | 6/18/13  | KF928644 |
| A/New Jersey/NHRC431112/2014 | 1/20/14  | KJ889278 |
| A/New Jersey/NHRC431116/2014 | 1/20/14  | KJ889256 |
| A/New Mexico/01/2012         | 1/26/12  | KC891471 |
| A/New Mexico/01/2013         | 1/4/13   | KF648265 |
| A/New Mexico/01/2014         | 1/6/14   | 509484   |
| A/New Mexico/02/2013         | 1/6/13   | KF648067 |
| A/New Mexico/03/2010         | 3/7/10   | KC780726 |
| A/New Mexico/03/2014         | 1/24/14  | 513276   |
| A/New Mexico/05/2012         | 3/6/12   | KC891246 |
| A/New Mexico/06/2011         | 2/21/11  | KC881937 |
| A/New Mexico/08/2009         | 10/2/09  | KC780138 |
| A/New Mexico/08/2012         | 3/29/12  | KC891164 |
| A/New Mexico/09/2009         | 11/8/09  | KC782150 |
| A/New Mexico/10/2011         | 3/29/11  | KC881585 |
| A/New Mexico/10/2012         | 4/30/12  | KC891181 |
| A/New Mexico/12/2012         | 4/9/12   | KC891314 |
| A/New Mexico/14/2012         | 5/3/12   | KC891406 |
| A/New York/02/2011           | 1/29/11  | KC882087 |
| A/New York/02/2013           | 1/22/13  | KF648255 |
| A/New York/03/2012           | 2/12/12  | KC891069 |
| A/New York/04/2011           | 2/21/11  | KC881931 |

|                      |          |          |
|----------------------|----------|----------|
| A/New York/09/2011   | 4/13/11  | KC881706 |
| A/New York/11/2012   | 3/5/12   | KC891115 |
| A/New York/12/2012   | 3/7/12   | KC891112 |
| A/New York/13/2012   | 3/19/12  | KC891109 |
| A/New York/14/2010   | 12/9/10  | KC881909 |
| A/New York/1680/2010 | 1/12/10  | CY062066 |
| A/New York/1999/2010 | 1/18/10  | CY062090 |
| A/New York/2175/2010 | 1/19/10  | CY062098 |
| A/New York/2876/2010 | 1/20/10  | CY062130 |
| A/New York/2963/2010 | 1/22/10  | CY062146 |
| A/New York/3074/2009 | 4/29/09  | CY047310 |
| A/New York/3187/2009 | 5/1/09   | CY041178 |
| A/New York/3195/2009 | 4/28/09  | CY041498 |
| A/New York/3221/2013 | 1/18/13  | CY141236 |
| A/New York/3250/2010 | 1/27/10  | CY062178 |
| A/New York/3260/2009 | 4/27/09  | CY040822 |
| A/New York/3264/2009 | 4/29/09  | CY040854 |
| A/New York/34/2012   | 4/17/12  | KC891574 |
| A/New York/3431/2013 | 3/26/13  | CY163419 |
| A/New York/3499/2009 | 5/16/09  | CY043187 |
| A/New York/3566/2009 | 5/20/09  | CY044048 |
| A/New York/3568/2009 | 5/19/09  | CY044064 |
| A/New York/36/2012   | 10/2/12  | KF648261 |
| A/New York/3623/2013 | 12/17/13 | CY187291 |
| A/New York/3624/2013 | 12/19/13 | CY187292 |
| A/New York/3625/2013 | 12/27/13 | CY187293 |
| A/New York/3626/2014 | 1/2/14   | CY187294 |
| A/New York/3627/2014 | 1/12/14  | CY187295 |
| A/New York/3682/2010 | 2/1/10   | CY065003 |
| A/New York/3795/2014 | 1/22/14  | CY187713 |
| A/New York/3796/2014 | 2/3/14   | CY187714 |

|                            |          |          |
|----------------------------|----------|----------|
| A/New York/3797/2014       | 2/6/14   | CY187715 |
| A/New York/3798/2014       | 3/31/14  | CY187716 |
| A/New York/3799/2014       | 3/28/14  | CY187717 |
| A/New York/3828/2009       | 6/2/09   | CY044997 |
| A/New York/3834/2010       | 1/27/10  | CY065019 |
| A/New York/3866/2010       | 1/29/10  | CY065035 |
| A/New York/3969/2009       | 6/9/09   | CY052122 |
| A/New York/4855/2009       | 9/9/09   | CY052170 |
| A/New York/5086/2009       | 10/13/09 | CY056515 |
| A/New York/5227/2009       | 10/20/09 | CY056563 |
| A/New York/5271/2009       | 10/22/09 | CY057286 |
| A/New York/6064/2009       | 11/11/09 | CY084438 |
| A/New York/6300/2009       | 11/17/09 | CY056707 |
| A/New York/6675/2009       | 11/24/09 | CY056779 |
| A/New York/7420/2010       | 1/2/10   | CY065067 |
| A/Newark/INS429/2010       | 3/5/10   | CY071367 |
| A/North Carolina/01/2010   | 1/12/10  | KC781895 |
| A/North Carolina/02/2010   | 1/9/10   | KC780617 |
| A/North Carolina/04/2011   | 2/16/11  | KC881924 |
| A/North Carolina/04/2012   | 1/23/12  | KC891449 |
| A/North Carolina/05/2010   | 2/24/10  | KC780361 |
| A/North Carolina/06/2010   | 3/9/10   | KC781173 |
| A/North Carolina/06/2011   | 1/20/11  | KC881705 |
| A/North Carolina/06/2012   | 2/7/12   | KC891037 |
| A/North Carolina/09/2012   | 3/1/12   | KC891408 |
| A/North Carolina/16/2012   | 3/28/12  | KC891152 |
| A/North Carolina/18/2012   | 4/26/12  | KC891216 |
| A/North Carolina/20/2012   | 7/2/12   | KC891005 |
| A/North Carolina/29/2012   | 12/27/12 | KF648089 |
| A/North Carolina/3498/2013 | 12/5/13  | CY163486 |
| A/North Carolina/3628/2013 | 12/24/13 | CY187296 |

|                            |          |          |
|----------------------------|----------|----------|
| A/North Carolina/3631/2013 | 12/27/13 | CY187299 |
| A/North Carolina/3632/2013 | 12/30/13 | CY187300 |
| A/North Carolina/3800/2014 | 2/4/14   | CY187718 |
| A/North Dakota/01/2012     | 2/26/12  | KC891096 |
| A/North Dakota/03/2011     | 1/14/11  | KC881882 |
| A/North Dakota/3634/2014   | 1/8/14   | CY187302 |
| A/North Dakota/3635/2013   | 12/6/13  | CY187303 |
| A/Ohio/02/2011             | 1/11/11  | KC881866 |
| A/Ohio/02/2013             | 1/8/13   | KF648104 |
| A/Ohio/04/2012             | 3/2/12   | KC891432 |
| A/Ohio/3482/2013           | 11/5/13  | CY163470 |
| A/Ohio/3636/2014           | 1/14/14  | CY187304 |
| A/Ohio/3802/2014           | 2/7/14   | CY187720 |
| A/Ohio/3803/2014           | 3/26/14  | CY187721 |
| A/Oklahoma/01/2010         | 9/25/10  | KC882105 |
| A/Oklahoma/01/2012         | 2/21/12  | KC891072 |
| A/Oklahoma/01/2014         | 1/6/14   | 508764   |
| A/Oklahoma/06/2014         | 3/17/14  | 531905   |
| A/Oklahoma/3642/2014       | 1/7/14   | CY187310 |
| A/Oklahoma/3643/2014       | 1/7/14   | CY187311 |
| A/Oklahoma/3644/2014       | 1/7/14   | CY187312 |
| A/Oklahoma/3645/2014       | 1/22/14  | CY187313 |
| A/Oklahoma/3646/2013       | 12/16/13 | CY187314 |
| A/Oklahoma/3804/2014       | 1/27/14  | CY187722 |
| A/Oklahoma/NHRC391991/2013 | 1/28/13  | KF886326 |
| A/Oklahoma/NHRC415703/2013 | 12/6/13  | KJ538526 |
| A/Oklahoma/NHRC415745/2013 | 12/13/13 | KJ538498 |
| A/Oregon/02/2012           | 1/24/12  | KC891035 |
| A/Oregon/03/2011           | 1/28/11  | KC881754 |
| A/Oregon/04/2011           | 2/7/11   | KC882214 |
| A/Oregon/06/2012           | 3/27/12  | KC891419 |

|                              |          |          |
|------------------------------|----------|----------|
| A/Oregon/08/2012             | 4/11/12  | KC891231 |
| A/Oregon/13/2011             | 12/16/11 | KC891378 |
| A/Oregon/35/2009             | 10/5/09  | KC781375 |
| A/Pennsylvania/01/2013       | 1/18/13  | KF647987 |
| A/Pennsylvania/02/2011       | 2/22/11  | KC881988 |
| A/Pennsylvania/02/2014       | 1/22/14  | 509954   |
| A/Pennsylvania/03/2014       | 1/22/14  | 509946   |
| A/Pennsylvania/05/2013       | 4/9/13   | KF648162 |
| A/Pennsylvania/06/2012       | 3/17/12  | KC891264 |
| A/Pennsylvania/07/2010       | 8/12/10  | KC781190 |
| A/Pennsylvania/08/2012       | 4/16/12  | KC891415 |
| A/Pennsylvania/16/2010       | 11/17/10 | KC881857 |
| A/Pennsylvania/16/2011       | 12/19/11 | KC891260 |
| A/Pennsylvania/17/2010       | 11/16/10 | KC881836 |
| A/Pennsylvania/30/2012       | 12/4/12  | KF648092 |
| A/Pennsylvania/31/2009       | 12/4/09  | KC780303 |
| A/Pennsylvania/31/2012       | 12/18/12 | KF648095 |
| A/Pennsylvania/32/2012       | 12/19/12 | KF648073 |
| A/Rhode/Island/02/2009       | 4/28/09  | GQ232044 |
| A/Rhode/Island/02/2012       | 2/29/12  | KC891090 |
| A/Rhode/Island/04/2012       | 3/21/12  | KC891267 |
| A/Rhode/Island/10/2012       | 12/5/12  | KF648276 |
| A/San Diego/INS201/2009      | 11/2/09  | CY066567 |
| A/San Diego/INS51/2009       | 10/12/09 | CY056875 |
| A/San Diego/INS73/2009       | 11/9/09  | CY083894 |
| A/San Diego/WR1624P/2009     | 6/13/09  | CY073310 |
| A/San Diego/WRAIR1654P/2009  | 6/15/09  | CY083336 |
| A/Santa Clara/YGA/03030/2013 | 1/8/13   | CY170671 |
| A/Santa Clara/YGA/03031/2013 | 1/8/13   | CY170679 |
| A/Santa Clara/YGA/03065/2013 | 1/26/13  | CY170927 |
| A/South Carolina/01/2013     | 7/10/13  | KF648015 |

|                                  |          |          |
|----------------------------------|----------|----------|
| A/South Carolina/02/2010         | 3/5/10   | KC781372 |
| A/South Carolina/02/2011         | 1/5/11   | KC881862 |
| A/South Carolina/10/2012         | 4/8/12   | KC891126 |
| A/South Carolina/13/2012         | 6/24/12  | KC891018 |
| A/South Carolina/15/2012         | 9/23/12  | KF648026 |
| A/South Carolina/19/2012         | 10/22/12 | KF648244 |
| A/South Carolina/20/2012         | 11/13/12 | KF648274 |
| A/South Carolina/29/2009         | 7/23/09  | KC781873 |
| A/South Carolina/3043/2012       | 10/4/12  | CY130176 |
| A/South Carolina/3472/2013       | 7/16/13  | CY163460 |
| A/South Carolina/3648/2013       | 12/19/13 | CY187316 |
| A/South Carolina/NHRC0001/2011   | 1/25/11  | CY092888 |
| A/South Carolina/NHRC0002/2011   | 1/29/11  | CY092896 |
| A/South Carolina/NHRC361211/2012 | 9/21/12  | KF928634 |
| A/South Carolina/NHRC362333/2012 | 10/2/12  | KF928610 |
| A/South Carolina/NHRC362335/2012 | 9/12/12  | KF199860 |
| A/South Carolina/NHRC363072/2012 | 10/10/12 | KF199855 |
| A/South Carolina/NHRC395489/2013 | 2/6/13   | KF886299 |
| A/South Carolina/NHRC419441/2013 | 12/27/13 | KJ889254 |
| A/South Carolina/NHRC421026/2014 | 1/15/14  | KJ889260 |
| A/South Dakota/01/2011           | 1/12/11  | KC881952 |
| A/South Dakota/3243/2013         | 1/4/13   | CY141258 |
| A/South Dakota/3493/2013         | 12/3/13  | CY163481 |
| A/South Dakota/3517/2013         | 12/11/13 | CY163505 |
| A/South Dakota/3652/2014         | 1/3/14   | CY187320 |
| A/South Dakota/3653/2014         | 1/3/14   | CY187321 |
| A/South Dakota/3654/2014         | 1/6/14   | CY187322 |
| A/South Dakota/3655/2014         | 1/7/14   | CY187323 |
| A/South Dakota/3657/2013         | 12/17/13 | CY187325 |
| A/South Dakota/3659/2013         | 12/18/13 | CY187327 |
| A/Tennessee/01/2011              | 2/23/11  | KC881682 |

|                            |          |          |
|----------------------------|----------|----------|
| A/Tennessee/01/2013        | 1/9/13   | KF648183 |
| A/Tennessee/02/2010        | 3/12/10  | KC781158 |
| A/Tennessee/02/2011        | 3/8/11   | KC881814 |
| A/Tennessee/02/2012        | 2/2/12   | KC891043 |
| A/Tennessee/03/2013        | 3/26/13  | KF648193 |
| A/Tennessee/05/2012        | 3/5/12   | KC891280 |
| A/Tennessee/09/2012        | 10/31/12 | KF648240 |
| A/Tennessee/F1063A/2010    | 2/26/10  | CY167356 |
| A/Tennessee/F1071/2010     | 3/2/10   | CY167388 |
| A/Tennessee/F1071B/2010    | 3/5/10   | CY167396 |
| A/Tennessee/F1076/2010     | 3/16/10  | CY167420 |
| A/Tennessee/F2005A/2010    | 12/10/10 | CY167468 |
| A/Tennessee/F2008c07A/2010 | 12/16/10 | CY167476 |
| A/Tennessee/F2014/2011     | 1/14/11  | CY167492 |
| A/Tennessee/F2026A/2011    | 2/4/11   | CY167556 |
| A/Tennessee/F2041A/2011    | 2/14/11  | CY167588 |
| A/Tennessee/F2068/2011     | 3/3/11   | CY167660 |
| A/Tennessee/F2083C/2011    | 4/13/11  | CY167724 |
| A/Tennessee/F2085/2011     | 3/17/11  | CY167309 |
| A/Tennessee/F2090/2011     | 3/31/11  | CY167748 |
| A/Texas/01/2010            | 1/13/10  | KC780947 |
| A/Texas/01/2011            | 1/5/11   | KC882052 |
| A/Texas/02/2012            | 1/7/12   | KC891054 |
| A/Texas/03/2010            | 6/1/10   | KC780149 |
| A/Texas/04/2011            | 1/23/11  | KC881785 |
| A/Texas/04/2012            | 1/9/12   | KC891358 |
| A/Texas/05/2012            | 1/15/12  | KC891363 |
| A/Texas/07/2011            | 2/16/11  | KC882147 |
| A/Texas/07/2012            | 1/10/12  | KC891588 |
| A/Texas/07/2013            | 1/5/13   | KF648178 |
| A/Texas/09/2014            | 1/18/14  | 507537   |

|                   |          |          |
|-------------------|----------|----------|
| A/Texas/10/2014   | 1/10/14  | 508762   |
| A/Texas/15/2013   | 8/15/13  | KF648172 |
| A/Texas/18/2012   | 2/1/12   | KC891464 |
| A/Texas/21/2012   | 2/12/12  | KC891060 |
| A/Texas/22/2012   | 2/26/12  | KC891093 |
| A/Texas/23/2012   | 1/26/12  | KC891506 |
| A/Texas/24/2012   | 2/25/12  | KC891543 |
| A/Texas/26/2012   | 2/21/12  | KC891541 |
| A/Texas/27/2012   | 2/23/12  | KC891534 |
| A/Texas/29/2012   | 2/24/12  | KC891500 |
| A/Texas/30/2012   | 3/2/12   | KC891276 |
| A/Texas/31/2012   | 3/2/12   | KC891528 |
| A/Texas/33/2012   | 3/12/12  | KC891519 |
| A/Texas/3425/2013 | 2/14/13  | CY163413 |
| A/Texas/35/2012   | 3/19/12  | KC891522 |
| A/Texas/3508/2013 | 12/4/13  | CY163496 |
| A/Texas/3509/2013 | 12/4/13  | CY163497 |
| A/Texas/3513/2013 | 12/9/13  | CY163501 |
| A/Texas/3515/2013 | 12/6/13  | CY163503 |
| A/Texas/3570/2013 | 12/19/13 | CY187238 |
| A/Texas/36/2012   | 3/7/12   | KC891305 |
| A/Texas/3661/2013 | 12/16/13 | CY187329 |
| A/Texas/3663/2013 | 12/19/13 | CY187331 |
| A/Texas/3664/2013 | 12/27/13 | CY187332 |
| A/Texas/3665/2014 | 1/3/14   | CY187333 |
| A/Texas/3666/2014 | 1/6/14   | CY187334 |
| A/Texas/3667/2014 | 1/3/14   | CY187335 |
| A/Texas/3668/2014 | 1/3/14   | CY187336 |
| A/Texas/3669/2014 | 1/3/14   | CY187337 |
| A/Texas/3670/2014 | 1/6/14   | CY187338 |
| A/Texas/3671/2014 | 1/6/14   | CY187339 |



|                       |          |          |
|-----------------------|----------|----------|
| A/Texas/3672/2014     | 1/7/14   | CY187340 |
| A/Texas/3673/2014     | 1/7/14   | CY187341 |
| A/Texas/3674/2014     | 1/7/14   | CY187342 |
| A/Texas/3675/2014     | 1/7/14   | CY187343 |
| A/Texas/3676/2014     | 1/14/14  | CY187344 |
| A/Texas/3678/2013     | 12/13/13 | CY187346 |
| A/Texas/3679/2013     | 12/17/13 | CY187347 |
| A/Texas/3680/2013     | 12/16/13 | CY187348 |
| A/Texas/3685/2013     | 12/19/13 | CY187353 |
| A/Texas/37/2012       | 3/14/12  | KC891020 |
| A/Texas/39/2009       | 5/22/09  | GQ377047 |
| A/Texas/42102708/2009 | 6/10/09  | CY052266 |
| A/Texas/42114261/2009 | 6/11/09  | CY051887 |
| A/Texas/42122969/2009 | 6/12/09  | CY051855 |
| A/Texas/42191653/2009 | 6/19/09  | CY051847 |
| A/Texas/42201824/2009 | 6/20/09  | CY051863 |
| A/Texas/42281289/2009 | 6/28/09  | CY052186 |
| A/Texas/45034157/2009 | 9/3/09   | CY052607 |
| A/Texas/45052569/2009 | 9/5/09   | CY052919 |
| A/Texas/45101424/2009 | 9/10/09  | CY052743 |
| A/Texas/45132214/2009 | 9/13/09  | CY052543 |
| A/Texas/46172734/2009 | 10/17/09 | CY058046 |
| A/Texas/46181292/2009 | 10/18/09 | CY058062 |
| A/Texas/47/2012       | 4/1/12   | KC891167 |
| A/Texas/48/2012       | 3/16/12  | KC891559 |
| A/Texas/49/2012       | 3/27/12  | KC891562 |
| A/Texas/66/2009       | 9/29/09  | KC780993 |
| A/Texas/71/2009       | 8/1/09   | KC780436 |
| A/Texas/90/2012       | 10/18/12 | KF647933 |
| A/Texas/99/2012       | 12/17/12 | KF648091 |
| A/Texas/JMM/52/2012   | 12/6/12  | CY135108 |

|                     |          |          |
|---------------------|----------|----------|
| A/Texas/JMM/53/2012 | 12/6/12  | CY135116 |
| A/Texas/JMS375/2009 | 11/23/09 | CY058716 |
| A/Texas/JMS387/2009 | 12/8/09  | CY061011 |
| A/Texas/JMS391/2009 | 12/23/09 | CY061043 |
| A/Texas/JMS395/2009 | 12/30/09 | CY061075 |
| A/Texas/JMS403/2010 | 1/4/10   | CY061586 |
| A/Texas/JMS404/2010 | 1/8/10   | CY061115 |
| A/Texas/JMS412/2010 | 2/1/10   | CY061179 |
| A/Texas/JMS415/2010 | 2/6/10   | CY061203 |
| A/Utah/01/2012      | 1/17/12  | KC891372 |
| A/Utah/01/2013      | 1/20/13  | KF648149 |
| A/Utah/04/2013      | 2/3/13   | KF648246 |
| A/Utah/06/2012      | 2/2/12   | KC891452 |
| A/Utah/08/2012      | 2/1/12   | KC891007 |
| A/Utah/09/2012      | 2/9/12   | KC891040 |
| A/Utah/10/2011      | 3/10/11  | KC882205 |
| A/Utah/11/2012      | 3/15/12  | KC891350 |
| A/Utah/16/2012      | 5/8/12   | KC891055 |
| A/Utah/3490/2013    | 12/2/13  | CY163478 |
| A/Utah/35/2009      | 7/9/09   | KC780623 |
| A/Utah/3691/2014    | 1/2/14   | CY187359 |
| A/Utah/3692/2014    | 1/3/14   | CY187360 |
| A/Utah/3693/2014    | 1/10/14  | CY187361 |
| A/Utah/3696/2013    | 12/17/13 | CY187364 |
| A/Utah/3697/2013    | 12/18/13 | CY187365 |
| A/Utah/3807/2014    | 1/24/14  | CY187725 |
| A/Utah/3808/2014    | 1/24/14  | CY187726 |
| A/Utah/53/2009      | 11/17/09 | KC781934 |
| A/Vermont/01/2010   | 2/4/10   | KC782022 |
| A/Vermont/02/2012   | 2/1/12   | KC891382 |
| A/Vermont/03/2012   | 2/6/12   | KC891010 |

|                            |          |          |
|----------------------------|----------|----------|
| A/Vermont/04/2011          | 1/14/11  | KC882019 |
| A/Vermont/16/2011          | 12/22/11 | KC891317 |
| A/Vermont/20/2009          | 10/8/09  | KC780713 |
| A/Virginia/01/2011         | 2/15/11  | KC881873 |
| A/Virginia/07/2012         | 3/9/12   | KC891343 |
| A/Virginia/11/2012         | 4/25/12  | KC891196 |
| A/Virginia/13/2012         | 8/21/12  | KF648210 |
| A/Virginia/27/2009         | 12/17/09 | KC780429 |
| A/Virginia/3258/2013       | 1/11/13  | CY141273 |
| A/Virginia/3260/2013       | 1/15/13  | CY141275 |
| A/Virginia/NHRC430739/2014 | 1/23/14  | KJ889280 |
| A/Virginia/NHRC430747/2014 | 1/18/14  | KJ889274 |
| A/Vladimir/IIV/35/2011     | 1/31/11  | JN153087 |
| A/Washington/01/2010       | 4/2/10   | KC781296 |
| A/Washington/05/2011       | 1/11/11  | KC881744 |
| A/Washington/07/2014       | 2/10/14  | 515369   |
| A/Washington/14/2012       | 2/13/12  | KC891078 |
| A/Washington/15/2012       | 2/13/12  | KC891081 |
| A/Washington/19/2012       | 2/24/12  | KC891283 |
| A/Washington/22/2012       | 3/20/12  | KC891170 |
| A/Washington/24/2012       | 6/17/12  | KC891401 |
| A/Washington/34/2012       | 7/30/12  | KC891213 |
| A/Washington/3473/2013     | 9/5/13   | CY163461 |
| A/Washington/3701/2014     | 1/12/14  | CY187369 |
| A/Washington/3702/2014     | 1/12/14  | CY187370 |
| A/Washington/3703/2013     | 12/17/13 | CY187371 |
| A/Washington/3809/2014     | 1/17/14  | CY187727 |
| A/Washington/44/2012       | 8/15/12  | KC891445 |
| A/West/Virginia/01/2011    | 1/1/11   | KC881630 |
| A/West/Virginia/04/2014    | 2/5/14   | 515378   |
| A/Wisconsin/02/2012        | 1/10/12  | KC891495 |

|                             |          |          |
|-----------------------------|----------|----------|
| A/Wisconsin/02/2013         | 1/2/13   | KF648114 |
| A/Wisconsin/06/2010         | 4/28/10  | KC782000 |
| A/Wisconsin/06/2012         | 2/3/12   | KC891477 |
| A/Wisconsin/07/2014         | 3/18/14  | 520440   |
| A/Wisconsin/11/2011         | 2/25/11  | KC882202 |
| A/Wisconsin/11/2012         | 4/1/12   | KC891121 |
| A/Wisconsin/12/2013         | 8/4/13   | KF648118 |
| A/Wisconsin/13/2013         | 9/5/13   | KJ136255 |
| A/Wisconsin/14/2012         | 5/24/12  | KC891394 |
| A/Wisconsin/15/2011         | 2/14/11  | KC881725 |
| A/Wisconsin/16/2012         | 6/4/12   | KC891412 |
| A/Wisconsin/26/2011         | 10/16/11 | KC891026 |
| A/Wisconsin/36/2012         | 10/15/12 | KF648213 |
| A/Wisconsin/45/2012         | 11/14/12 | KF647924 |
| A/Wisconsin/53/2009         | 9/1/09   | KC782308 |
| A/Wisconsin/629/D00295/2009 | 11/15/09 | CY057854 |
| A/Wisconsin/629/D00374/2009 | 6/1/09   | CY050943 |
| A/Wisconsin/629/D00592/2009 | 6/2/09   | CY050983 |
| A/Wisconsin/629/D00698/2009 | 5/27/09  | CY046811 |
| A/Wisconsin/629/D00740/2009 | 10/16/09 | CY063259 |
| A/Wisconsin/629/D00830/2009 | 10/12/09 | CY063243 |
| A/Wisconsin/629/D00881/2009 | 6/1/09   | CY089888 |
| A/Wisconsin/629/D00916/2009 | 6/14/09  | CY051119 |
| A/Wisconsin/629/D01014/2009 | 11/8/09  | CY057782 |
| A/Wisconsin/629/D01092/2009 | 5/3/09   | CY046275 |
| A/Wisconsin/629/D01189/2009 | 5/2/09   | CY046395 |
| A/Wisconsin/629/D01482/2009 | 5/10/09  | CY050444 |
| A/Wisconsin/629/D01522/2009 | 9/18/09  | CY057438 |
| A/Wisconsin/629/D01528/2009 | 11/29/09 | CY057966 |
| A/Wisconsin/629/D01572/2009 | 11/19/09 | CY063307 |
| A/Wisconsin/629/D01973/2009 | 6/26/09  | CY052114 |

|                             |          |          |
|-----------------------------|----------|----------|
| A/Wisconsin/629/D02024/2009 | 6/22/09  | CY051199 |
| A/Wisconsin/629/D02082/2009 | 10/19/09 | CY063267 |
| A/Wisconsin/629/S0235/2009  | 6/10/09  | CY090000 |
| A/Wisconsin/629/S1414/2009  | 10/26/09 | CY058316 |
| A/Wyoming/06/2012           | 3/10/12  | KC891273 |
| A/Wyoming/09/2012           | 4/5/12   | KC891146 |
| A/Wyoming/15/2009           | 10/7/09  | KC781032 |
| A/Wyoming/23/2012           | 12/4/12  | KF647925 |
| A/Wyoming/31/2012           | 12/26/12 | KF648122 |
| A/Wyoming/3705/2014         | 1/7/14   | CY187373 |
| A/Wyoming/3706/2014         | 1/7/14   | CY187374 |
| A/Wyoming/3707/2014         | 1/7/14   | CY187375 |
| A/Wyoming/3708/2014         | 1/7/14   | CY187376 |

**Table S3. Pandemic H1N1 influenza A virus sequences (NA segment) used in this analysis (Fig. S3).** Virus name, date of viral collection, and GenBank accession number for NA sequences from 178 influenza viruses collected in swine in the United States during 2009-2014 and 688 influenza viruses collected in humans in the United States during 2009-2014. Accession numbers beginning with '5' refer to the 77 NA sequences from human influenza viruses from 2013-2014 that were downloaded from the GISAID database ([www.gisaid.org](http://www.gisaid.org)) to supplement the number of viruses from these underrepresented years.

| <b>Virus name</b>                     | <b>Date</b> | <b>Accession</b> |
|---------------------------------------|-------------|------------------|
| A/swine/Arkansas/SG1321/2009(H1N1)    | 12/28/09    | AHB51416         |
| A/swine/Arkansas/SG1347/2010(H1N1)    | 1/6/10      | AHB52270         |
| A/swine/Arkansas/SG1499/2010(H1N1)    | 8/11/10     | AHB23109         |
| A/swine/Colorado/A01203099/2011(H1N1) | 12/22/11    | AFM47041         |
| A/swine/IL/10-001550/2009(H1N1)       | 12/29/09    | ADD64925         |
| A/swine/IL/10-001551-1/2009(H1N1)     | 12/20/09    | ADD64929         |
| A/swine/IL/10-001551-2/2009(H1N1)     | 12/20/09    | ADD64933         |
| A/swine/IL/12660/2010(H1N1)           | 2/23/10     | ADG85222         |
| A/swine/IL/17315-1/2010(H1N1)         | 3/18/10     | ADG85242         |
| A/swine/IL/17315-3/2010(H1N1)         | 3/18/10     | ADG85246         |
| A/swine/IL/25399-2/2010(H1N1)         | 5/18/10     | ADN95953         |
| A/swine/IL/25399-3/2010(H1N1)         | 5/18/10     | ADN95957         |
| A/swine/IL/25399-4/2010(H1N1)         | 5/18/10     | ADN95961         |
| A/swine/IL/27486-1/2010(H1N1)         | 6/2/10      | ADN95965         |
| A/swine/IL/27486-2/2010(H1N1)         | 6/2/10      | ADN95969         |
| A/swine/IL/32974/2009(H1N1)           | 11/11/09    | ADB82961         |
| A/swine/IL/35572/2009(H1N1)           | 12/16/09    | ADD64917         |
| A/swine/IL/35573/2009(H1N1)           | 12/16/09    | ADD64921         |
| A/swine/IL/3910/2010(H1N1)            | 1/11/10     | ADD37831         |
| A/swine/IL/5265-1/2010(H1N1)          | 1/25/10     | ADD64937         |
| A/swine/IL/5265-2/2010(H1N1)          | 1/25/10     | ADD64941         |
| A/swine/Illinois/02957/2010(H1N1)     | 1/26/10     | AHB21797         |
| A/swine/Illinois/A01047061/2010(H1N1) | 11/29/10    | AFN07833         |
| A/swine/Illinois/A01047715/2010(H1N1) | 12/14/10    | AFN07903         |

|                                       |          |          |
|---------------------------------------|----------|----------|
| A/swine/Illinois/A01047796/2010(H1N1) | 12/30/10 | AFN07913 |
| A/swine/Illinois/A01047800/2010(H1N1) | 12/30/10 | AFL56816 |
| A/swine/Illinois/A01047977/2011(H1N1) | 1/17/11  | AFN08631 |
| A/swine/Illinois/A01049574/2011(H1N1) | 2/16/11  | AEZ54159 |
| A/swine/Illinois/A01049575/2011(H1N1) | 2/16/11  | AEZ54160 |
| A/swine/Illinois/A01049673/2011(H1N1) | 3/10/11  | AEZ54161 |
| A/swine/Illinois/A01076179/2009(H1N1) | 12/6/09  | AFM78663 |
| A/swine/Illinois/A01076194/2010(H1N1) | 2/21/10  | AFH76997 |
| A/swine/Illinois/A01076203/2010(H1N1) | 4/11/10  | AFH76998 |
| A/swine/Illinois/A01076907/2010(H1N1) | 11/1/10  | AFH76999 |
| A/swine/Illinois/A01076948/2010(H1N1) | 11/11/10 | AFN07807 |
| A/swine/Illinois/A01116954/2011(H1N1) | 11/10/11 | AFJ19119 |
| A/swine/Illinois/A01134200/2011(H1N1) | 1/26/11  | AFN08339 |
| A/swine/Illinois/A01134201/2011(H1N1) | 1/26/11  | AFH77000 |
| A/swine/Illinois/A01134329/2011(H1N1) | 2/7/11   | AFN08445 |
| A/swine/Illinois/A01134451/2011(H1N1) | 2/14/11  | AFN08463 |
| A/swine/Illinois/A01134459/2011(H1N1) | 2/18/11  | AFN08473 |
| A/swine/Illinois/A01134559/2011(H1N1) | 2/24/11  | AFN08513 |
| A/swine/Illinois/A01134565/2011(H1N1) | 2/24/11  | AFN08517 |
| A/swine/Illinois/A01134671/2011(H1N1) | 3/7/11   | AFN08559 |
| A/swine/Illinois/A01134706/2011(H1N1) | 3/10/11  | AFN08573 |
| A/swine/Illinois/A01134707/2011(H1N1) | 3/10/11  | AFH77003 |
| A/swine/Illinois/A01134711/2011(H1N1) | 3/10/11  | AFN08579 |
| A/swine/Illinois/A01134883/2011(H1N1) | 3/23/11  | AFN08635 |
| A/swine/Illinois/A01240201/2011(H1N1) | 12/8/11  | AFU10064 |
| A/swine/Illinois/A01327211/2010(H1N1) | 10/7/10  | AFQ60232 |
| A/swine/Illinois/A01328547/2012(H1N1) | 5/21/12  | AFU08611 |
| A/swine/Illinois/A01328548/2012(H1N1) | 5/21/12  | AFU08931 |
| A/swine/Illinois/A01395201/2013(H1N1) | 11/18/13 | AHF20502 |
| A/swine/Illinois/A01397807/2013(H1N1) | 7/10/13  | AGU01920 |
| A/swine/Illinois/A01398316/2013(H1N1) | 7/23/13  | AGU69948 |

|                                       |          |          |
|---------------------------------------|----------|----------|
| A/swine/Illinois/A01398610/2013(H1N1) | 8/9/13   | AGW83307 |
| A/swine/Illinois/A01398628/2013(H1N1) | 8/9/13   | AGW83315 |
| A/swine/Illinois/A01411340/2014(H1N1) | 2014/01  | AHL21520 |
| A/swine/Illinois/A01411419/2014(H1N1) | 2014/02  | AHM24140 |
| A/swine/Illinois/A01490609/2014(H1N1) | 1/8/14   | AHJ57443 |
| A/swine/Illinois/A01492501/2014(H1N1) | 2/12/14  | AHN19439 |
| A/swine/Illinois/A01493472/2014(H1N1) | 3/26/14  | AHY84444 |
| A/swine/IN/17311/2010(H1N1)           | 3/17/10  | ADG85234 |
| A/swine/Indiana/13/2011(H1N1)         | 2011/06  | AEW46961 |
| A/swine/Indiana/27007/2009(H1N1)      | 2009     | ADB66688 |
| A/swine/Indiana/A01049247/2010(H1N1)  | 12/8/10  | AEI87765 |
| A/swine/Indiana/A01327232/2010(H1N1)  | 3/4/10   | AFQ60236 |
| A/swine/Indiana/A01327233/2010(H1N1)  | 9/21/10  | AFQ60244 |
| A/swine/Indiana/A01327237/2010(H1N1)  | 2/11/10  | AFQ60258 |
| A/swine/Indiana/SG1367/2010(H1N1)     | 11/23/10 | AHB24504 |
| A/swine/Iowa/44837-1/2009(H1N1)       | 11/8/09  | ADP05205 |
| A/swine/Iowa/A01049003/2010(H1N1)     | 11/15/10 | AEC23299 |
| A/swine/Iowa/A01049004/2010(H1N1)     | 11/15/10 | AEC23300 |
| A-swine-Iowa-A01049020-2010(mixed)    | 11/16/10 | AFM46557 |
| A/swine/Iowa/A01049037/2010(H1N1)     | 11/16/10 | AEC23306 |
| A/swine/Iowa/A01049077/2010(H1N1)     | 11/17/10 | AEC23315 |
| A/swine/Iowa/A01049195/2010(H1N1)     | 12/1/10  | AFM46543 |
| A/swine/Iowa/A01049205/2010(H1N1)     | 12/3/10  | AFM46544 |
| A/swine/Iowa/A01049239/2010(H1N1)     | 12/8/10  | AEI87762 |
| A/swine/Iowa/A01049379/2011(H1N1)     | 1/3/11   | AEI87772 |
| A/swine/Iowa/A01049478/2011(H1N1)     | 1/27/11  | AEP17232 |
| A/swine/Iowa/A01049578/2011(H1N1)     | 2/17/11  | AEP17233 |
| A/swine/Iowa/A01202097/2011(H1N1)     | 6/21/11  | AFM46687 |
| A/swine/Iowa/A01202099/2011(H1N1)     | 6/21/11  | AFM46688 |
| A/swine/Iowa/A01202511/2011(H1N1)     | 8/11/11  | AFM46709 |
| A/swine/Iowa/A01202554/2011(H1N1)     | 8/30/11  | AFM46712 |



|                                        |          |          |
|----------------------------------------|----------|----------|
| A/swine/lowa/A01202834/2011(H1N1)      | 11/14/11 | AFM46900 |
| A/swine/lowa/A01202853/2011(H1N1)      | 11/15/11 | AFM46903 |
| A/swine/lowa/A01202854/2011(H1N1)      | 11/15/11 | AFM46904 |
| A/swine/lowa/A01202918/2011(H1N1)      | 11/29/11 | AFM47036 |
| A/swine/lowa/A01410472/2014(H1N1)      | 3/3/14   | AHY95067 |
| A/swine/lowa/A01432960/2013(H1N1)      | 2013/08  | AGW25667 |
| A/swine/Kansas/A01377299/2014(H1N1)    | 4/30/14  | AID48018 |
| A/swine/Kansas/A01410327/2014(H1N1)    | 2/7/14   | AHW46678 |
| A/swine/Kentucky/A01134742/2011(H1N1)  | 2/27/11  | AFN08509 |
| A/swine/Minnesota/02976/2010(H1N1)     | 1/12/10  | AHB22441 |
| A/swine/Minnesota/02979/2010(H1N1)     | 2/17/10  | AEO91826 |
| A/swine/Minnesota/0432/2010(H1N1)      | 2/10/10  | AEV21636 |
| A/swine/Minnesota/074A/2009(H1N1)      | 8/26/09  | ADU85797 |
| A/swine/Minnesota/130A/2009(H1N1)      | 9/1/09   | ADU85798 |
| A/swine/Minnesota/136B/2009(H1N1)      | 8/31/09  | ADU85800 |
| A/swine/Minnesota/165A/2009(H1N1)      | 8/28/09  | ADU85801 |
| A/swine/Minnesota/54354/2010(H1N1)     | 10/27/10 | ADQ54384 |
| A/swine/Minnesota/A01047907/2010(H1N1) | 12/6/10  | AFN07895 |
| A/swine/Minnesota/A01049347/2010(H1N1) | 12/29/10 | AEI87770 |
| A/swine/Minnesota/A01049428/2011(H1N1) | 1/18/11  | AEI87773 |
| A/swine/Minnesota/A01076627/2010(H1N1) | 10/18/10 | AFN08099 |
| A/swine/Minnesota/A01116365/2011(H1N1) | 10/3/11  | AFN08305 |
| A/swine/Minnesota/A01134649/2011(H1N1) | 2/23/11  | AFH77014 |
| A/swine/Minnesota/A01134650/2011(H1N1) | 2/23/11  | AFN08501 |
| A/swine/Minnesota/A01134815/2011(H1N1) | 3/18/11  | AFH77015 |
| A/swine/Minnesota/A01134821/2011(H1N1) | 3/18/11  | AFN08619 |
| A/swine/Minnesota/A01134826/2011(H1N1) | 3/18/11  | AFN08611 |
| A/swine/Minnesota/A01134830/2011(H1N1) | 3/18/11  | AFH77016 |
| A/swine/Minnesota/A01134836/2011(H1N1) | 3/18/11  | AFN08605 |
| A/swine/Minnesota/A01134843/2011(H1N1) | 3/18/11  | AFL56844 |
| A/swine/Minnesota/A01201202/2011(H1N1) | 4/21/11  | AFN08167 |

|                                        |          |          |
|----------------------------------------|----------|----------|
| A/swine/Minnesota/A01201605/2011(H1N1) | 5/17/11  | AFN08189 |
| A/swine/Minnesota/A01328420/2012(H1N1) | 5/14/12  | AFU09051 |
| A/swine/Minnesota/A01381276/2013(H1N1) | 5/23/13  | AGO86679 |
| A/swine/Minnesota/A01392911/2013(H1N1) | 10/10/13 | AHA57091 |
| A/swine/Minnesota/A01491447/2014(H1N1) | 1/27/14  | AHL21455 |
| A/swine/Minnesota/A01491451/2014(H1N1) | 1/27/14  | AHL21447 |
| A/swine/Minnesota/A01491464/2014(H1N1) | 1/27/14  | AHL21435 |
| A/swine/Minnesota/A01491704/2014(H1N1) | 2/4/14   | AHM24114 |
| A/swine/Minnesota/A01076188/2010(H1N1) | 1/24/10  | AFL56826 |
| A/swine/Missouri/A01203163/2012(H1N1)  | 1/17/12  | AFM47050 |
| A/swine/Missouri/A01492887/2014(H1N1)  | 2/10/14  | AHY20811 |
| A/swine/MN/25618/2011(H1N1)            | 2/10/11  | AEJ90185 |
| A/swine/MN/8761/2010(H1N1)             | 2/16/10  | ADD64945 |
| A/swine/MN/8762-1/2010(H1N1)           | 2/16/10  | ADD64949 |
| A/swine/MN/8762-2/2010(H1N1)           | 2/16/10  | ADD64953 |
| A/swine/MO/15534/2010(H1N1)            | 3/24/10  | ADG85230 |
| A/swine/MO/17314/2010(H1N1)            | 3/31/10  | ADG85238 |
| A/swine/MO/23881/2010(H1N1)            | 4/29/10  | ADN95949 |
| A/swine/NC/13598/2010(H1N1)            | 3/9/10   | ADG85226 |
| A/swine/NC/19646/2010(H1N1)            | 4/20/10  | ADG85250 |
| A/swine/NC/34543/2009(H1N1)            | 11/24/09 | ADB82965 |
| A/swine/NC/34752/2009(H1N1)            | 12/14/09 | ADB82969 |
| A/swine/Nebraska/A01047438/2010(H1N1)  | 11/11/10 | AFN07873 |
| A/swine/Nebraska/A01049048/2010(H1N1)  | 11/17/10 | AEC23308 |
| A/swine/Nebraska/A01116986/2010(H1N1)  | 11/11/10 | AFN07783 |
| A/swine/Nebraska/A01241113/2012(H1N1)  | 1/10/12  | AFU08591 |
| A/swine/Nebraska/A01366774/2014(H1N1)  | 1/17/14  | AHJ57473 |
| A/swine/Nebraska/A01491300/2014(H1N1)  | 1/27/14  | AHL21443 |
| A/swine/Nebraska/A01491382/2014(H1N1)  | 1/27/14  | AHL21431 |
| A/swine/Nebraska/A01491508/2014(H1N1)  | 1/30/14  | AHM24122 |
| A/swine/Nebraska/A01492657/2014(H1N1)  | 2/27/14  | AHW46541 |

|                                             |          |          |
|---------------------------------------------|----------|----------|
| A/swine/Nebraska/A01509523/2014(H1N1)       | 4/24/14  | AIB06035 |
| A/swine/North Carolina/A01049163/2010(H1N1) | 11/30/10 | AEF33053 |
| A/swine/North Carolina/A01049173/2010(H1N1) | 11/30/10 | AEF33055 |
| A/swine/North Carolina/A01049174/2010(H1N1) | 11/30/10 | AEF33056 |
| A/swine/North Carolina/A01076176/2009(H1N1) | 11/29/09 | AFL56824 |
| A/swine/North Carolina/A01076189/2010(H1N1) | 1/31/10  | AFL56827 |
| A/swine/North Carolina/A01076198/2010(H1N1) | 3/14/10  | AFL56828 |
| A/swine/North Carolina/A01076213/2010(H1N1) | 6/27/10  | AFH77019 |
| A/swine/North Carolina/A01116713/2010(H1N1) | 10/6/10  | AFN08091 |
| A/swine/North Carolina/A01202450/2011(H1N1) | 7/14/11  | AFM46699 |
| A/swine/North Carolina/A01202451/2011(H1N1) | 7/14/11  | AFM46700 |
| A/swine/North Carolina/A01241246/2012(H1N1) | 1/3/12   | AFU08967 |
| A/swine/North Carolina/A01410044/2013(H1N1) | 12/20/13 | AHJ57459 |
| A/swine/North Carolina/A01410047/2013(H1N1) | 12/20/13 | AHK10674 |
| A/swine/North Carolina/A01410573/2014(H1N1) | 3/21/14  | AHZ65730 |
| A/swine/OH/9838/2011(H1N1)                  | 2/21/11  | AEF29000 |
| A/swine/Ohio/A01134769/2011(H1N1)           | 8/3/11   | AFN08563 |
| A/swine/Ohio/A01201432/2011(H1N1)           | 3/22/11  | AFN08627 |
| A/swine/Ohio/A01349888/2013(H1N1)           | 4/15/13  | AGM53836 |
| A/swine/Ohio/A01349920/2013(H1N1)           | 4/16/13  | AGM53840 |
| A/swine/Ohio/A01349978/2013(H1N1)           | 4/17/13  | AGM53844 |
| A/swine/Ohio/A01432602/2013(H1N1)           | 2013/04  | AGK62674 |
| A/swine/Oklahoma/02989/2010(H1N1)           | 3/12/10  | AHB24445 |
| A/swine/Oklahoma/A01290605/2013(H1N1)       | 2013/10  | AHA57164 |
| A/swine/OR/A00700068/2011(H1N1)             | 5/18/11  | AEJ90189 |
| A/swine/Pennsylvania/A01134526/2011(H1N1)   | 2/14/11  | AFN08467 |
| A/swine/South Dakota/A01201469/2011(H1N1)   | 5/9/11   | AFH77021 |
| A/swine/South Dakota/A01201470/2011(H1N1)   | 5/9/11   | AFN08177 |
| A/swine/Texas/A01104003/2011(H1N1)          | 7/16/11  | AEP33169 |
| A/swine/Texas/A01104004/2011(H1N1)          | 7/16/11  | AEP33159 |
| A/Alabama/01/2012                           | 1/6/12   | KC891324 |

|                        |          |          |
|------------------------|----------|----------|
| A/Alabama/04/2013      | 2/25/13  | KF647919 |
| A/Alabama/06/2010      | 7/19/10  | KC781193 |
| A/Alabama/06/2012      | 3/19/12  | KC891347 |
| A/Alaska/01/2012       | 3/14/12  | KC891336 |
| A/Alaska/02/2014       | 1/14/14  | 508775   |
| A/Alaska/07/2014       | 4/18/14  | 532622   |
| A/Alaska/11/2011       | 3/9/11   | KC881808 |
| A/Alaska/14/2011       | 3/30/11  | KC882074 |
| A/Alaska/36/2012       | 12/28/12 | KF648134 |
| A/Alaska/40/2009       | 10/1/09  | KC780965 |
| A/Alaska/43/2009       | 11/10/09 | KC781686 |
| A/Arizona/01/2011      | 2/1/11   | KC881967 |
| A/Arizona/02/2010      | 2/2/10   | KC782069 |
| A/Arizona/02/2011      | 3/8/11   | KC882010 |
| A/Arizona/03/2010      | 3/6/10   | KC780611 |
| A/Arizona/05/2010      | 5/11/10  | KC780323 |
| A/Arizona/06/2010      | 5/29/10  | KC782231 |
| A/Arizona/08/2012      | 1/24/12  | KC891235 |
| A/Arizona/17/2009      | 10/15/09 | KC782057 |
| A/Arizona/20/2009      | 12/6/09  | KC781016 |
| A/Boston/127/2009      | 6/17/09  | CY064590 |
| A/Boston/130/2009      | 6/21/09  | CY064606 |
| A/Boston/145/2009      | 7/9/09   | CY063512 |
| A/Boston/583/2009      | 10/10/09 | CY089189 |
| A/Boston/637/2009      | 11/8/09  | CY089253 |
| A/Boston/678/2009      | 11/17/09 | CY089317 |
| A/Boston/680/2009      | 11/17/09 | CY089325 |
| A/Boston/701/2009      | 11/27/09 | CY075630 |
| A/Boston/DOA08/2011    | 1/13/11  | CY134467 |
| A/Boston/DOA14/2011    | 1/19/11  | CY111208 |
| A/Boston/DOA2/099/2012 | 12/23/12 | CY148318 |

|                         |          |          |
|-------------------------|----------|----------|
| A/Boston/DOA34/2011     | 2/7/11   | CY134499 |
| A/Boston/DOA39/2011     | 2/12/11  | CY134523 |
| A/Boston/DOA49/2011     | 2/17/11  | CY134571 |
| A/Boston/DOA70/2011     | 3/3/11   | CY111376 |
| A/Boston/DOA90/2012     | 2/21/12  | CY125777 |
| A/Boston/DOA93/2012     | 3/26/12  | CY125785 |
| A/Boston/YGA/00037/2013 | 1/10/13  | CY168097 |
| A/Boston/YGA/00087/2013 | 1/30/13  | CY168425 |
| A/Boston/YGA/01002/2012 | 12/19/12 | CY168537 |
| A/Boston/YGA/01041/2012 | 12/25/12 | CY168809 |
| A/Boston/YGA/01185/2013 | 1/21/13  | CY169865 |
| A/Boston/YGA/01202/2013 | 2/3/13   | CY169977 |
| A/Boston/YGA/01217/2013 | 3/17/13  | CY170081 |
| A/Boston/YGA/01218/2013 | 3/18/13  | CY170089 |
| A/Boston/YGA/02024/2013 | 1/7/13   | CY170257 |
| A/Bronx/INS3/673/2012   | 3/6/12   | CY176692 |
| A/Bronx/INS3/674/2012   | 3/21/12  | CY176700 |
| A/Brooklyn/INS549/2011  | 3/24/11  | CY129656 |
| A/Brownsville/31OS/2009 | 5/22/09  | CY053208 |
| A/Brownsville/34H/2009  | 5/23/09  | CY053232 |
| A/California/01/2014    | 1/6/14   | 509447   |
| A/California/07/2010    | 4/23/10  | KC780215 |
| A/California/07/2011    | 1/27/11  | KC881616 |
| A/California/08/2014    | 1/17/14  | 513278   |
| A/California/09/2010    | 5/11/10  | KC782238 |
| A/California/09/2013    | 1/22/13  | KF648142 |
| A/California/12/2012    | 1/19/12  | KC891447 |
| A/California/13/2009    | 4/21/09  | GQ323523 |
| A/California/14/2011    | 1/7/11   | KC881739 |
| A/California/16/2012    | 1/18/12  | KC891016 |
| A/California/17/2013    | 1/12/13  | KF647977 |

|                              |          |          |
|------------------------------|----------|----------|
| A/California/19/2011         | 3/2/11   | KC882224 |
| A/California/19/2012         | 2/14/12  | KC891085 |
| A/California/19/2013         | 3/9/13   | KF648190 |
| A/California/20/2011         | 2/21/11  | KC882268 |
| A/California/20/2013         | 3/8/13   | KF648186 |
| A/California/21/2011         | 3/13/11  | KC882273 |
| A/California/21/2012         | 2/20/12  | KC891515 |
| A/California/21/2013         | 5/3/13   | KF648227 |
| A/California/24/2011         | 9/15/11  | KC891488 |
| A/California/24/2013         | 8/8/13   | KF648165 |
| A/California/25/2012         | 3/30/12  | KC891436 |
| A/California/33/2012         | 5/1/12   | KC891315 |
| A/California/44/2012         | 10/19/12 | KF648130 |
| A/California/52/2011         | 12/28/11 | KC891326 |
| A/California/NHRC414615/2013 | 12/4/13  | KJ538507 |
| A/California/NHRC417059/2013 | 12/30/13 | KJ635895 |
| A/California/NHRC417074/2013 | 12/30/13 | KJ635897 |
| A/California/NHRC417252/2013 | 12/23/13 | KJ635905 |
| A/California/NHRC417255/2013 | 12/23/13 | KJ635911 |
| A/California/NHRC417583/2013 | 12/26/13 | KJ635907 |
| A/California/NHRC418267/2014 | 1/6/14   | KJ635899 |
| A/California/NHRC418270/2013 | 12/30/13 | KJ635915 |
| A/California/NHRC418282/2013 | 12/23/13 | KJ635913 |
| A/California/NHRC419631/2014 | 1/14/14  | KJ889265 |
| A/California/NHRC419698/2014 | 1/16/14  | KJ889267 |
| A/California/NHRC420942/2014 | 1/12/14  | KJ889277 |
| A/California/NHRC421018/2014 | 1/17/14  | KJ889269 |
| A/California/NHRC423907/2014 | 1/29/14  | KJ889259 |
| A/California/VRDL10/2010     | 2/11/10  | CY063181 |
| A/California/VRDL12/2009     | 6/15/09  | CY055457 |
| A/California/VRDL126/2009    | 12/22/09 | CY066385 |

|                                   |          |          |
|-----------------------------------|----------|----------|
| A/California/VRDL13/2010          | 1/25/10  | CY063205 |
| A/California/VRDL74/2009          | 8/10/09  | CY055496 |
| A/California/VRDL91/2009          | 10/17/09 | CY063101 |
| A/Chicago/WRAIR1691P/2009         | 10/14/09 | CY083497 |
| A/Chicago/YGA/04019/2012          | 12/7/12  | CY171161 |
| A/Chicago/YGA/04123/2012          | 12/30/12 | CY171545 |
| A/Colorado/02/2011                | 1/24/11  | KC881889 |
| A/Colorado/03/2013                | 3/23/13  | KF648000 |
| A/Colorado/03/2014                | 1/8/14   | 503797   |
| A/Colorado/04/2011                | 3/23/11  | KC881657 |
| A/Colorado/05/2014                | 3/10/14  | 517084   |
| A/Colorado/11/2010                | 12/29/10 | KC882365 |
| A/Colorado/12/2012                | 3/21/12  | KC891345 |
| A/Colorado/13/2009                | 10/6/09  | KC780928 |
| A/Connecticut/01/2011             | 1/12/11  | KC881633 |
| A/Connecticut/02/2010             | 4/5/10   | KC781220 |
| A/Connecticut/02/2013             | 7/6/13   | KF648006 |
| A/Connecticut/05/2014             | 1/19/14  | 517042   |
| A/Connecticut/08/2011             | 4/2/11   | KC882193 |
| A/Connecticut/13/2009             | 9/13/09  | KC781826 |
| A/Delaware/01/2010                | 1/15/10  | KC781919 |
| A/Delaware/01/2012                | 1/22/12  | KC891456 |
| A/Delaware/01/2014                | 2/5/14   | 515375   |
| A/Delaware/02/2009                | 4/28/09  | GQ160593 |
| A/Delaware/03/2012                | 2/12/12  | KC891502 |
| A/Delaware/03/2014                | 2/13/14  | 516343   |
| A/Delaware/05/2014                | 2/21/14  | 516321   |
| A/District of Columbia/04/2011    | 2/12/11  | KC881693 |
| A/District of Columbia/INS29/2009 | 10/26/09 | CY056110 |
| A/District of Columbia/INS33/2009 | 10/26/09 | CY056126 |
| A/District of Columbia/INS43/2009 | 10/26/09 | CY056182 |

|                                       |          |          |
|---------------------------------------|----------|----------|
| A/District of Columbia/INS601/2011    | 1/13/11  | CY129880 |
| A/District of Columbia/WRAIR0309/2010 | 12/30/10 | CY097839 |
| A/District of Columbia/WRAIR0310/2010 | 8/27/10  | CY097847 |
| A/Durham/INS3/648/2012                | 3/8/12   | CY176532 |
| A/Florida/01/2012                     | 1/3/12   | KC891377 |
| A/Florida/02/2010                     | 2/2/10   | KC780539 |
| A/Florida/02/2013                     | 1/23/13  | KF648133 |
| A/Florida/03/2011                     | 1/4/11   | KC881604 |
| A/Florida/04/2010                     | 3/18/10  | KC781431 |
| A/Florida/05/2014                     | 1/6/14   | 503800   |
| A/Florida/06/2012                     | 2/27/12  | JX905423 |
| A/Florida/07/2013                     | 2/26/13  | KF647965 |
| A/Florida/07/2014                     | 1/9/14   | 504774   |
| A/Florida/08/2011                     | 2/3/11   | KC881885 |
| A/Florida/10/2013                     | 3/11/13  | KF648126 |
| A/Florida/13/2012                     | 4/3/12   | KC891223 |
| A/Florida/15/2012                     | 5/1/12   | KC891441 |
| A/Florida/16/2013                     | 6/19/13  | KF647944 |
| A/Florida/17/2013                     | 5/7/13   | KF647948 |
| A/Florida/17/2014                     | 2/14/14  | 517081   |
| A/Florida/18/2013                     | 6/15/13  | KF647956 |
| A/Florida/19/2011                     | 5/24/11  | KC881595 |
| A/Florida/19/2013                     | 7/2/13   | KF647955 |
| A/Florida/20/2013                     | 7/7/13   | KF648017 |
| A/Florida/22/2013                     | 5/2/13   | KF648086 |
| A/Florida/27/2011                     | 10/30/11 | KC891200 |
| A/Florida/31/2009                     | 12/10/09 | KC780221 |
| A/Florida/38/2012                     | 8/25/12  | KF647907 |
| A/Florida/38/2013                     | 8/20/13  | KJ136250 |
| A/Florida/57/2012                     | 12/12/12 | KF648277 |
| A/Gainesville/03/2014                 | 1/12/14  | KJ645788 |



|                          |          |          |
|--------------------------|----------|----------|
| A/Gainesville/04/2014    | 1/13/14  | KJ645789 |
| A/Gainesville/05/2014    | 1/15/14  | KJ645771 |
| A/Gainesville/06/2014    | 1/19/14  | KJ645790 |
| A/Gainesville/07/2014    | 2/7/14   | KJ645791 |
| A/Gainesville/08/2013    | 12/4/13  | KJ645763 |
| A/Gainesville/09/2013    | 12/12/13 | KJ645786 |
| A/Gainesville/10/2013    | 12/30/13 | KJ645787 |
| A/Georgia/01/2010        | 2/6/10   | KC780241 |
| A/Georgia/01/2013        | 1/2/13   | KF648145 |
| A/Georgia/02/2011        | 3/5/11   | KC881675 |
| A/Georgia/02/2013        | 4/8/13   | KF648191 |
| A/Georgia/06/2012        | 2/24/12  | KC891287 |
| A/Georgia/07/2010        | 2/6/10   | KC781283 |
| A/Georgia/07/2012        | 3/5/12   | KC891290 |
| A/Georgia/08/2012        | 3/7/12   | KC891253 |
| A/Georgia/09/2012        | 2/24/12  | KC891348 |
| A/Georgia/21/2010        | 11/15/10 | KC882152 |
| A/Georgia/23/2009        | 9/11/09  | KC781674 |
| A/Georgia/25/2010        | 12/31/10 | KC882077 |
| A/Hawaii/01/2010         | 1/3/10   | KC781237 |
| A/Hawaii/01/2013         | 5/28/13  | KF648226 |
| A/Hawaii/01/2014         | 2/3/14   | 524289   |
| A/Hawaii/02/2010         | 1/2/10   | KC781434 |
| A/Hawaii/03/2014         | 2/22/14  | 534034   |
| A/Hawaii/04/2010         | 3/8/10   | KC780589 |
| A/Hawaii/05/2010         | 3/30/10  | KC780259 |
| A/Hawaii/05/2011         | 9/7/11   | KC891396 |
| A/Hawaii/07/2014         | 5/3/14   | 531848   |
| A/Hawaii/16/2010         | 10/5/10  | KC882109 |
| A/Hawaii/47/2012         | 12/16/12 | KF648146 |
| A/Headington/INS590/2011 | 1/5/11   | CY129832 |

|                        |          |          |
|------------------------|----------|----------|
| A/Houston/10H/2009     | 5/13/09  | CY053065 |
| A/Houston/23H/2009     | 7/7/09   | CY053160 |
| A/Houston/3H/2009      | 5/18/09  | CY052993 |
| A/Houston/JMM/122/2013 | 1/8/13   | CY183147 |
| A/Houston/JMM/131/2013 | 1/9/13   | CY183219 |
| A/Houston/JMM/148/2013 | 1/15/13  | CY183331 |
| A/Houston/JMM/152/2013 | 2/5/13   | CY186045 |
| A/Houston/JMM/155/2013 | 1/21/13  | CY186069 |
| A/Houston/JMM/159/2013 | 2/8/13   | CY186101 |
| A/Houston/JMM/163/2013 | 1/30/13  | CY186133 |
| A/Houston/JMM/171/2013 | 1/27/13  | CY186189 |
| A/Houston/JMM/64/2012  | 12/12/12 | CY182715 |
| A/Houston/JMM/93/2012  | 12/28/12 | CY182931 |
| A/Idaho/01/2014        | 1/3/14   | 509476   |
| A/Idaho/02/2014        | 1/7/14   | 509469   |
| A/Idaho/03/2012        | 1/27/12  | KC891056 |
| A/Idaho/04/2013        | 2/8/13   | KF647978 |
| A/Idaho/05/2012        | 1/31/12  | KC891076 |
| A/Idaho/07/2012        | 2/18/12  | KC891286 |
| A/Idaho/09/2009        | 9/2/09   | KC781624 |
| A/Idaho/15/2012        | 4/18/12  | KC891330 |
| A/Idaho/15/2012        | 4/18/12  | KC891334 |
| A/Idaho/16/2012        | 5/1/12   | KC891155 |
| A/Illinois/01/2012     | 1/25/12  | KC891564 |
| A/Illinois/01/2014     | 1/4/14   | 510153   |
| A/Illinois/02/2011     | 1/12/11  | KC881863 |
| A/Illinois/02/2013     | 3/11/13  | KF647973 |
| A/Illinois/03/2012     | 4/16/12  | KC891405 |
| A/Illinois/03/2014     | 3/2/14   | 524287   |
| A/Illinois/04/2012     | 2/29/12  | KC891140 |
| A/Illinois/05/2012     | 3/2/12   | KC891137 |

|                            |          |          |
|----------------------------|----------|----------|
| A/Illinois/06/2012         | 3/8/12   | KC891134 |
| A/Illinois/07/2012         | 3/12/12  | KC891131 |
| A/Illinois/NHRC0001/2011   | 1/26/11  | CY092874 |
| A/Illinois/NHRC414454/2013 | 11/25/13 | KJ538531 |
| A/Illinois/NHRC414456/2013 | 11/25/13 | KJ538511 |
| A/Illinois/NHRC415706/2013 | 12/11/13 | KJ538539 |
| A/Illinois/NHRC415712/2013 | 12/12/13 | KJ538495 |
| A/Illinois/NHRC415715/2013 | 12/12/13 | KJ538523 |
| A/Illinois/NHRC415721/2013 | 12/6/13  | KJ538503 |
| A/Illinois/NHRC417104/2013 | 12/17/13 | KJ635901 |
| A/Indiana/02/2012          | 3/2/12   | KC891387 |
| A/Indiana/02/2013          | 1/14/13  | KF648125 |
| A/Indiana/03/2013          | 2/2/13   | KF648197 |
| A/Indiana/05/2011          | 2/20/11  | KC882197 |
| A/Indiana/06/2010          | 7/29/10  | KC882027 |
| A/Indiana/07/2011          | 2/7/11   | KC882363 |
| A/Indiana/09/2009          | 4/22/09  | GQ117094 |
| A/Indiana/12/2013          | 7/3/13   | KF648050 |
| A/Indiana/167/2012         | 11/25/12 | KF648009 |
| A/Indiana/22/2013          | 8/13/13  | KF648167 |
| A/Iowa/03/2013             | 5/11/13  | KF647902 |
| A/Iowa/04/2010             | 3/3/10   | KC781350 |
| A/Iowa/05/2014             | 3/4/14   | 517045   |
| A/Iowa/09/2012             | 3/17/12  | KC891175 |
| A/Iowa/10/2009             | 10/26/09 | KC780982 |
| A/Iowa/11/2012             | 4/12/12  | KC891229 |
| A/Iowa/12/2012             | 4/14/12  | KC891186 |
| A/Iowa/18/2010             | 12/23/10 | KC882155 |
| A/Kansas/02/2010           | 1/23/10  | KC781420 |
| A/Kansas/02/2011           | 1/19/11  | KC881948 |
| A/Kansas/03/2013           | 3/21/13  | KF648038 |

|                           |          |          |
|---------------------------|----------|----------|
| A/Kansas/04/2012          | 2/13/12  | KC891067 |
| A/Kansas/07/2012          | 3/13/12  | KC891243 |
| A/Kansas/17/2009          | 8/8/09   | KC781568 |
| A/Kentucky/01/2014        | 2/3/14   | 513272   |
| A/Kentucky/02/2013        | 2/8/13   | KF647929 |
| A/Kentucky/03/2012        | 2/10/12  | KC891088 |
| A/Kentucky/04/2010        | 2/22/10  | KC781162 |
| A/Kentucky/04/2013        | 3/30/13  | KF648037 |
| A/Kentucky/05/2013        | 6/27/13  | KF647990 |
| A/Kentucky/06/2013        | 6/7/13   | KF648216 |
| A/Kentucky/07/2012        | 2/19/12  | KC891157 |
| A/Kentucky/08/2012        | 3/29/12  | KC891148 |
| A/Kentucky/18/2009        | 9/2/09   | KC782084 |
| A/Kentucky/23/2012        | 12/25/12 | KF648184 |
| A/Los/Angeles/INS423/2010 | 2/5/10   | CY083819 |
| A/Louisiana/01/2012       | 3/15/12  | KC891338 |
| A/Louisiana/03/2011       | 3/22/11  | KC881811 |
| A/Louisiana/03/2012       | 4/3/12   | KC891154 |
| A/Louisiana/05/2013       | 4/11/13  | KF648159 |
| A/Louisiana/07/2011       | 3/24/11  | KC882415 |
| A/Maine/01/2011           | 2/1/11   | KC881762 |
| A/Maine/01/2012           | 1/11/12  | KC891361 |
| A/Maine/02/2014           | 2/12/14  | 515359   |
| A/Maine/03/2010           | 12/28/10 | KC882254 |
| A/Maine/03/2012           | 3/6/12   | KC891240 |
| A/Maine/03/2014           | 3/12/14  | 516328   |
| A/Maine/06/2012           | 4/4/12   | KC891122 |
| A/Maine/09/2009           | 11/10/09 | KC780865 |
| A/Maryland/02/2013        | 1/4/13   | KF647930 |
| A/Maryland/02/2014        | 1/3/14   | 508742   |
| A/Maryland/03/2011        | 1/10/11  | KC881900 |

|                             |          |          |
|-----------------------------|----------|----------|
| A/Maryland/03/2012          | 1/28/12  | KC891481 |
| A/Maryland/04/2010          | 2/8/10   | KC780585 |
| A/Maryland/04/2011          | 2/2/11   | KC881963 |
| A/Maryland/04/2014          | 2/3/14   | 510142   |
| A/Maryland/05/2010          | 3/31/10  | KC781120 |
| A/Maryland/05/2011          | 1/24/11  | KC882350 |
| A/Maryland/07/2011          | 2/25/11  | KC882335 |
| A/Maryland/08/2014          | 2/21/14  | 524290   |
| A/Maryland/09/2014          | 3/8/14   | 524291   |
| A/Maryland/11/2014          | 3/31/14  | 531895   |
| A/Maryland/12/2012          | 3/8/12   | KC891583 |
| A/Maryland/12/2014          | 4/22/14  | 536849   |
| A/Maryland/13/2012          | 4/1/12   | KC891220 |
| A/Maryland/16/2012          | 5/15/12  | KC891329 |
| A/Maryland/21/2012          | 7/12/12  | KC891214 |
| A/Maryland/31/2012          | 9/24/12  | KF648033 |
| A/Maryland/33/2009          | 7/14/09  | KC782051 |
| A/Maryland/37/2012          | 11/8/12  | KF647921 |
| A/Maryland/NHRC0004/2009    | 10/23/09 | CY092938 |
| A/Massachusetts/01/2010     | 2/1/10   | KC780314 |
| A/Massachusetts/01/2013     | 1/2/13   | KF648098 |
| A/Massachusetts/03/2010     | 9/2/10   | KC781235 |
| A/Massachusetts/04/2011     | 1/8/11   | KC882070 |
| A/Massachusetts/05/2012     | 3/12/12  | KC891423 |
| A/Massachusetts/10/2013     | 6/30/13  | KF647950 |
| A/Michigan/01/2012          | 3/4/12   | KC891103 |
| A/Michigan/02/2010          | 2/24/10  | KC781257 |
| A/Michigan/02/2011          | 2/23/11  | KC882146 |
| A/Michigan/02/2014          | 1/8/14   | 503829   |
| A/Michigan/04/2014          | 3/25/14  | 531890   |
| A/Minneapolis/INS3/675/2012 | 2/27/12  | CY176708 |

|                            |          |          |
|----------------------------|----------|----------|
| A/Minnesota/01/2010        | 1/1/10   | KC780309 |
| A/Minnesota/01/2014        | 1/3/14   | 515733   |
| A/Minnesota/02/2010        | 2/17/10  | KC782002 |
| A/Minnesota/02/2013        | 3/1/13   | KF647972 |
| A/Minnesota/03/2014        | 3/16/14  | 517090   |
| A/Minnesota/06/2014        | 4/11/14  | 531828   |
| A/Minnesota/15/2010        | 12/5/10  | KC882166 |
| A/Minnesota/16/2012        | 10/29/12 | KF647954 |
| A/Minnesota/34/2012        | 12/20/12 | KF648181 |
| A/Mississippi/07/2011      | 2/23/11  | KC881678 |
| A/Missouri/01/2010         | 12/21/10 | KC882256 |
| A/Missouri/01/2014         | 1/13/14  | 508758   |
| A/Missouri/03/2010         | 11/30/10 | KC882072 |
| A/Missouri/03/2012         | 1/18/12  | KC891459 |
| A/Missouri/03/2013         | 2/5/13   | KF647926 |
| A/Missouri/04/2012         | 2/6/12   | KC891030 |
| A/Missouri/06/2014         | 4/21/14  | 531854   |
| A/Missouri/NHRC419710/2014 | 1/10/14  | KJ889273 |
| A/Montana/01/2010          | 4/4/10   | KC782117 |
| A/Montana/01/2014          | 1/8/14   | 503838   |
| A/Montana/03/2014          | 3/18/14  | 516294   |
| A/Montana/06/2011          | 3/3/11   | KC882200 |
| A/Montana/09/2012          | 3/26/12  | KC891226 |
| A/Nebraska/01/2010         | 1/28/10  | KC780448 |
| A/Nebraska/02/2010         | 3/11/10  | KC781400 |
| A/Nebraska/05/2013         | 2/6/13   | KF647958 |
| A/Nebraska/06/2012         | 2/9/12   | KC891475 |
| A/Nebraska/10/2011         | 3/3/11   | KC882228 |
| A/Nebraska/13/2009         | 8/6/09   | KC781473 |
| A/Nevada/01/2014           | 1/1/14   | 504785   |
| A/Nevada/02/2014           | 1/2/14   | 503841   |

|                              |          |          |
|------------------------------|----------|----------|
| A/Nevada/05/2011             | 2/13/11  | KC882068 |
| A/Nevada/06/2012             | 1/23/12  | KC891490 |
| A/Nevada/06/2013             | 7/23/13  | KF648121 |
| A/Nevada/11/2012             | 3/3/12   | KC891271 |
| A/Nevada/17/2012             | 4/4/12   | KC891160 |
| A/New Hampshire/01/2010      | 1/3/10   | KC780573 |
| A/New Hampshire/03/2010      | 10/4/10  | KC881852 |
| A/New Hampshire/03/2012      | 1/30/12  | KC891469 |
| A/New Hampshire/04/2014      | 1/31/14  | 515400   |
| A/New Hampshire/05/2014      | 1/30/14  | 515366   |
| A/New Hampshire/06/2014      | 2/10/14  | 515397   |
| A/New Hampshire/07/2012      | 3/10/12  | KC891442 |
| A/New Hampshire/09/2012      | 4/11/12  | KC891117 |
| A/New Hampshire/20/2012      | 11/24/12 | KF647995 |
| A/New Jersey/02/2012         | 1/17/12  | KC891411 |
| A/New Jersey/03/2012         | 5/2/12   | KC891189 |
| A/New Jersey/04/2013         | 3/19/13  | KF648040 |
| A/New Jersey/05/2011         | 3/3/11   | KC881696 |
| A/New Jersey/07/2012         | 11/20/12 | KF648127 |
| A/New Jersey/11/2012         | 12/8/12  | KF648055 |
| A/New Jersey/NHRC403730/2013 | 6/18/13  | KF928645 |
| A/New Jersey/NHRC431112/2014 | 1/20/14  | KJ889279 |
| A/New Jersey/NHRC431116/2014 | 1/20/14  | KJ889257 |
| A/New Mexico/01/2010         | 1/5/10   | KC781019 |
| A/New Mexico/01/2012         | 1/26/12  | KC891472 |
| A/New Mexico/01/2013         | 1/4/13   | KF648248 |
| A/New Mexico/01/2014         | 1/6/14   | 509483   |
| A/New Mexico/02/2010         | 2/1/10   | KC780950 |
| A/New Mexico/02/2013         | 1/6/13   | KF648218 |
| A/New Mexico/02/2013         | 1/6/13   | KF648268 |
| A/New Mexico/03/2014         | 1/24/14  | 513275   |

|                      |          |          |
|----------------------|----------|----------|
| A/New Mexico/04/2011 | 2/7/11   | KC881959 |
| A/New Mexico/04/2014 | 2/10/14  | 515380   |
| A/New Mexico/05/2012 | 3/6/12   | KC891247 |
| A/New Mexico/06/2011 | 2/21/11  | KC881935 |
| A/New Mexico/08/2011 | 4/19/11  | KC882135 |
| A/New Mexico/08/2012 | 3/29/12  | KC891163 |
| A/New Mexico/10/2011 | 3/29/11  | KC882191 |
| A/New Mexico/10/2012 | 4/30/12  | KC891180 |
| A/New Mexico/10/2013 | 4/10/13  | KF648207 |
| A/New Mexico/12/2009 | 10/21/09 | KC780916 |
| A/New Mexico/12/2012 | 4/9/12   | KC891310 |
| A/New Mexico/14/2012 | 5/3/12   | KC891410 |
| A/New York/01/2011   | 1/4/11   | KC881761 |
| A/New York/01/2014   | 1/1/14   | 503433   |
| A/New York/02/2011   | 1/29/11  | KC882086 |
| A/New York/02/2013   | 1/22/13  | KF648247 |
| A/New York/0259/2009 | 12/26/09 | CY062036 |
| A/New York/03/2011   | 3/20/11  | KC882008 |
| A/New York/0357/2009 | 12/30/09 | CY062052 |
| A/New York/04/2010   | 2/25/10  | KC781914 |
| A/New York/04/2011   | 2/21/11  | KC881930 |
| A/New York/06/2014   | 2/3/14   | 515494   |
| A/New York/07/2013   | 5/8/13   | KF647904 |
| A/New York/09/2011   | 4/13/11  | KC882249 |
| A/New York/11/2012   | 3/5/12   | KC891114 |
| A/New York/12/2012   | 3/7/12   | KC891111 |
| A/New York/13/2012   | 3/19/12  | KC891108 |
| A/New York/14/2010   | 12/9/10  | KC881887 |
| A/New York/14/2012   | 3/22/12  | KC891105 |
| A/New York/2175/2010 | 1/19/10  | CY062100 |
| A/New York/2372/2010 | 1/20/10  | CY062108 |



|                      |          |          |
|----------------------|----------|----------|
| A/New York/2648/2010 | 1/22/10  | CY062124 |
| A/New York/2876/2010 | 1/20/10  | CY062132 |
| A/New York/2960/2010 | 1/26/10  | CY062140 |
| A/New York/2971/2010 | 1/23/10  | CY062156 |
| A/New York/3002/2009 | 4/25/09  | CY041615 |
| A/New York/3209/2009 | 4/25/09  | CY041543 |
| A/New York/3230/2010 | 1/25/10  | CY062164 |
| A/New York/3247/2009 | 4/29/09  | CY041728 |
| A/New York/3250/2010 | 1/27/10  | CY062180 |
| A/New York/3251/2010 | 1/26/10  | CY062188 |
| A/New York/34/2012   | 4/17/12  | KC891580 |
| A/New York/36/2012   | 10/2/12  | KF648258 |
| A/New York/3681/2010 | 2/1/10   | CY064997 |
| A/New York/3683/2010 | 2/1/10   | CY065013 |
| A/New York/3740/2009 | 5/18/09  | CY044090 |
| A/New York/3866/2010 | 1/29/10  | CY065037 |
| A/New York/4438/2009 | 6/25/09  | CY050184 |
| A/New York/4476/2009 | 7/1/09   | CY051569 |
| A/New York/45/2012   | 12/2/12  | KF648011 |
| A/New York/4607/2009 | 7/14/09  | CY051625 |
| A/New York/4780/2009 | 8/18/09  | CY051705 |
| A/New York/4788/2009 | 8/21/09  | CY052164 |
| A/New York/4881/2009 | 9/12/09  | CY052180 |
| A/New York/4944/2009 | 9/23/09  | CY056405 |
| A/New York/4981/2009 | 10/5/09  | CY056429 |
| A/New York/5976/2009 | 11/9/09  | CY056613 |
| A/New York/6214/2009 | 11/16/09 | CY056677 |
| A/New York/6293/2009 | 11/16/09 | CY056701 |
| A/New York/6977/2009 | 12/11/09 | CY061980 |
| A/New York/7420/2010 | 1/2/10   | CY065069 |
| A/New York/7421/2009 | 12/6/09  | CY065077 |

|                            |          |          |
|----------------------------|----------|----------|
| A/New York/7480/2010       | 3/1/10   | CY065109 |
| A/North Carolina/02/2014   | 1/1/14   | 508451   |
| A/North Carolina/03/2014   | 1/12/14  | 508739   |
| A/North Carolina/04/2012   | 1/23/12  | KC891450 |
| A/North Carolina/04/2014   | 2/16/14  | 509408   |
| A/North Carolina/06/2012   | 2/7/12   | KC891038 |
| A/North Carolina/06/2014   | 2/10/14  | 516315   |
| A/North Carolina/07/2013   | 4/9/13   | KF648238 |
| A/North Carolina/08/2013   | 7/24/13  | KF648081 |
| A/North Carolina/09/2011   | 1/20/11  | KC881665 |
| A/North Carolina/09/2012   | 3/1/12   | KC891258 |
| A/North Carolina/09/2013   | 8/27/13  | KJ136253 |
| A/North Carolina/11/2014   | 3/8/14   | 533999   |
| A/North Carolina/16/2012   | 3/28/12  | KC891151 |
| A/North Carolina/18/2012   | 4/26/12  | KC891217 |
| A/North Carolina/20/2012   | 7/2/12   | KC891048 |
| A/North Carolina/29/2012   | 12/27/12 | KF648064 |
| A/North Carolina/38/2009   | 10/21/09 | KC781002 |
| A/North Dakota/01/2012     | 2/26/12  | KC891097 |
| A/North Dakota/01/2014     | 1/26/14  | 520463   |
| A/Ohio/02/2011             | 1/11/11  | KC881865 |
| A/Ohio/02/2013             | 1/8/13   | KF648101 |
| A/Ohio/04/2011             | 2/1/11   | KC882236 |
| A/Ohio/04/2012             | 3/2/12   | KC891431 |
| A/Oklahoma/01/2011         | 1/4/11   | KC881607 |
| A/Oklahoma/02/2014         | 1/14/14  | 508746   |
| A/Oklahoma/03/2012         | 3/5/12   | KC891172 |
| A/Oklahoma/03/2014         | 2/4/14   | 520457   |
| A/Oklahoma/NHRC415703/2013 | 12/6/13  | KJ538527 |
| A/Oklahoma/NHRC415745/2013 | 12/13/13 | KJ538499 |
| A/Oklahoma/NHRC417098/2013 | 12/14/13 | KJ635903 |

|                        |          |          |
|------------------------|----------|----------|
| A/Oregon/01/2010       | 3/29/10  | KC780913 |
| A/Oregon/02/2010       | 9/7/10   | KC881846 |
| A/Oregon/02/2012       | 1/24/12  | KC891058 |
| A/Oregon/04/2011       | 2/7/11   | KC882215 |
| A/Oregon/04/2014       | 3/24/14  | 531863   |
| A/Oregon/06/2012       | 3/27/12  | KC891418 |
| A/Oregon/08/2012       | 4/11/12  | KC891232 |
| A/Oregon/31/2009       | 8/12/09  | KC781857 |
| A/Pennsylvania/01/2011 | 1/22/11  | KC881734 |
| A/Pennsylvania/01/2013 | 1/18/13  | KF647989 |
| A/Pennsylvania/02/2011 | 2/22/11  | KC882061 |
| A/Pennsylvania/02/2014 | 1/22/14  | 509953   |
| A/Pennsylvania/03/2010 | 3/2/10   | KC781414 |
| A/Pennsylvania/04/2011 | 3/13/11  | KC882210 |
| A/Pennsylvania/04/2013 | 2/14/13  | KF647908 |
| A/Pennsylvania/04/2014 | 1/28/14  | 510136   |
| A/Pennsylvania/05/2013 | 4/9/13   | KF648151 |
| A/Pennsylvania/06/2012 | 3/17/12  | KC891265 |
| A/Pennsylvania/07/2011 | 2/28/11  | KC881821 |
| A/Pennsylvania/08/2012 | 4/16/12  | KC891198 |
| A/Pennsylvania/16/2011 | 12/19/11 | KC891261 |
| A/Pennsylvania/17/2010 | 11/16/10 | KC881838 |
| A/Pennsylvania/19/2014 | 1/21/14  | 516302   |
| A/Pennsylvania/24/2014 | 3/11/14  | 517066   |
| A/Pennsylvania/25/2012 | 11/23/12 | KF647932 |
| A/Pennsylvania/29/2014 | 4/5/14   | 531924   |
| A/Pennsylvania/30/2012 | 12/4/12  | KF648060 |
| A/Pennsylvania/31/2012 | 12/18/12 | KF648065 |
| A/Pennsylvania/32/2012 | 12/19/12 | KF648077 |
| A/Rhode/Island/02/2012 | 2/29/12  | KC891091 |
| A/Rhode/Island/04/2012 | 3/21/12  | KC891268 |

|                                  |          |          |
|----------------------------------|----------|----------|
| A/Rhode/Island/10/2012           | 12/5/12  | KF648008 |
| A/Rhode/Island/20/2009           | 11/9/09  | KC780820 |
| A/Rhode/Island/25/2009           | 12/30/09 | KC780630 |
| A/San Diego/INS214/2009          | 11/9/09  | CY066785 |
| A/San Diego/INS215/2009          | 11/10/09 | CY066793 |
| A/San Diego/INS217/2009          | 11/12/09 | CY066809 |
| A/San Diego/INS51/2009           | 10/12/09 | CY056877 |
| A/San Diego/WR1639P/2009         | 7/1/09   | CY073412 |
| A/San Diego/WRAIR1642P/2009      | 6/6/09   | CY083258 |
| A/San Diego/WRAIR1665P/2009      | 9/23/09  | CY083409 |
| A/Santa/Clara/YGA/03030/2013     | 1/8/13   | CY170673 |
| A/Santa/Clara/YGA/03031/2013     | 1/8/13   | CY170681 |
| A/Santa/Clara/YGA/03033/2013     | 1/15/13  | CY170697 |
| A/Santa/Clara/YGA/03053/2013     | 1/19/13  | CY170841 |
| A/Santa/Clara/YGA/03065/2013     | 1/26/13  | CY170929 |
| A/South Carolina/01/2013         | 7/10/13  | KF648007 |
| A/South Carolina/08/2012         | 2/27/12  | KC891259 |
| A/South Carolina/09/2009         | 4/26/09  | GQ117053 |
| A/South Carolina/10/2012         | 4/8/12   | KC891125 |
| A/South Carolina/13/2012         | 6/24/12  | KC891207 |
| A/South Carolina/15/2012         | 9/23/12  | KF648030 |
| A/South Carolina/18/2009         | 9/16/09  | KC782212 |
| A/South Carolina/19/2012         | 10/22/12 | KF648242 |
| A/South Carolina/20/2012         | 11/13/12 | KF648275 |
| A/South Carolina/3042/2012       | 10/3/12  | CY130174 |
| A/South Carolina/3043/2012       | 10/4/12  | CY130177 |
| A/South Carolina/NHRC361211/2012 | 9/21/12  | KF928635 |
| A/South Carolina/NHRC362333/2012 | 10/2/12  | KF928611 |
| A/South Carolina/NHRC362336/2012 | 9/26/12  | KF928649 |
| A/South Carolina/NHRC419441/2013 | 12/27/13 | KJ889255 |
| A/South Carolina/NHRC421026/2014 | 1/15/14  | KJ889261 |

|                              |          |          |
|------------------------------|----------|----------|
| A/South Dakota/02/2014       | 3/9/14   | 517075   |
| A/Tennessee/01/2010          | 2/23/10  | KC782138 |
| A/Tennessee/01/2013          | 1/9/13   | KF648177 |
| A/Tennessee/02/2012          | 2/2/12   | KC891044 |
| A/Tennessee/03/2013          | 3/26/13  | KF648188 |
| A/Tennessee/05/2012          | 3/5/12   | KC891281 |
| A/Tennessee/05/2014          | 2/17/14  | 531833   |
| A/Tennessee/19/2009          | 12/16/09 | KC780485 |
| A/Tennessee/F1052A/2010      | 2/9/10   | CY167334 |
| A/Tennessee/F1068/2010       | 3/2/10   | CY167382 |
| A/Tennessee/F1076/2010       | 3/16/10  | CY167422 |
| A/Tennessee/F1076A/2010      | 3/19/10  | CY167430 |
| A/Tennessee/F1089/2010       | 3/24/10  | CY167454 |
| A/Tennessee/F1093A/2010      | 4/5/10   | CY167462 |
| A/Tennessee/F2014/2011       | 1/14/11  | CY167494 |
| A/Tennessee/F2026/2011       | 2/2/11   | CY167550 |
| A/Tennessee/F2026A/2011      | 2/4/11   | CY167558 |
| A/Tennessee/F2080c7879A/2011 | 3/25/11  | CY167718 |
| A/Tennessee/F2085/2011       | 3/17/11  | CY167311 |
| A/Texas/04/2012              | 1/9/12   | KC891379 |
| A/Texas/05/2012              | 1/15/12  | KC891351 |
| A/Texas/07/2013              | 1/5/13   | KF648179 |
| A/Texas/08/2009              | 4/24/09  | GQ168632 |
| A/Texas/08/2011              | 3/6/11   | KC882218 |
| A/Texas/08/2014              | 1/9/14   | 504771   |
| A/Texas/10/2011              | 7/3/11   | KC881590 |
| A/Texas/10/2013              | 3/3/13   | KF647970 |
| A/Texas/13/2013              | 7/21/13  | KF648078 |
| A/Texas/15/2013              | 8/15/13  | KF648171 |
| A/Texas/18/2012              | 2/1/12   | KC891465 |
| A/Texas/21/2012              | 2/12/12  | KC891013 |

|                       |          |          |
|-----------------------|----------|----------|
| A/Texas/22/2012       | 2/26/12  | KC891094 |
| A/Texas/23/2012       | 1/26/12  | KC891508 |
| A/Texas/24/2012       | 2/25/12  | KC891512 |
| A/Texas/26/2012       | 2/21/12  | KC891545 |
| A/Texas/29/2012       | 2/24/12  | KC891499 |
| A/Texas/30/2012       | 3/2/12   | KC891277 |
| A/Texas/31/2012       | 3/2/12   | KC891526 |
| A/Texas/33/2012       | 3/12/12  | KC891518 |
| A/Texas/34/2012       | 3/8/12   | KC891525 |
| A/Texas/35/2012       | 3/19/12  | KC891521 |
| A/Texas/36/2012       | 3/7/12   | KC891421 |
| A/Texas/37/2012       | 3/14/12  | KC891434 |
| A/Texas/42191647/2009 | 6/19/09  | CY052236 |
| A/Texas/43242018/2009 | 7/24/09  | CY051825 |
| A/Texas/45034157/2009 | 9/3/09   | CY052609 |
| A/Texas/46241654/2009 | 10/24/09 | CY060837 |
| A/Texas/47/2012       | 4/1/12   | KC891166 |
| A/Texas/48/2012       | 3/16/12  | KC891560 |
| A/Texas/49/2012       | 3/27/12  | KC891554 |
| A/Texas/69/2009       | 11/1/09  | KC780177 |
| A/Texas/90/2012       | 10/18/12 | KF647928 |
| A/Texas/99/2012       | 12/17/12 | KF648058 |
| A/Texas/JMM/52/2012   | 12/6/12  | CY135110 |
| A/Texas/JMM/53/2012   | 12/6/12  | CY135118 |
| A/Texas/JMS359/2009   | 11/7/09  | CY060861 |
| A/Texas/JMS363/2009   | 11/8/09  | CY060885 |
| A/Texas/JMS375/2009   | 11/23/09 | CY058718 |
| A/Texas/JMS405/2010   | 1/9/10   | CY061125 |
| A/Texas/JMS413/2010   | 2/3/10   | CY061189 |
| A/Utah/01/2012        | 1/17/12  | KC891371 |
| A/Utah/01/2013        | 1/20/13  | KF648137 |

|                    |          |          |
|--------------------|----------|----------|
| A/Utah/01/2014     | 1/5/14   | 509498   |
| A/Utah/02/2010     | 2/10/10  | KC780503 |
| A/Utah/02/2011     | 1/18/11  | KC881578 |
| A/Utah/02/2014     | 2/7/14   | 515743   |
| A/Utah/03/2014     | 1/24/14  | 515385   |
| A/Utah/04/2013     | 2/3/13   | KF648270 |
| A/Utah/04/2014     | 2/5/14   | 515357   |
| A/Utah/05/2013     | 4/14/13  | KF648158 |
| A/Utah/06/2012     | 2/2/12   | KC891453 |
| A/Utah/06/2013     | 5/12/13  | KF648225 |
| A/Utah/08/2012     | 2/1/12   | KC891008 |
| A/Utah/08/2013     | 8/5/13   | KJ136193 |
| A/Utah/09/2012     | 2/9/12   | KC891041 |
| A/Utah/10/2011     | 3/10/11  | KC882206 |
| A/Utah/11/2012     | 3/15/12  | KC891349 |
| A/Utah/16/2012     | 5/8/12   | KC891312 |
| A/Vermont/01/2010  | 2/4/10   | KC782021 |
| A/Vermont/02/2012  | 2/1/12   | KC891383 |
| A/Vermont/03/2012  | 2/6/12   | KC891011 |
| A/Vermont/03/2013  | 4/8/13   | KF648155 |
| A/Vermont/04/2011  | 1/14/11  | KC882003 |
| A/Vermont/30/2009  | 12/22/09 | KC780294 |
| A/Virginia/01/2011 | 2/15/11  | KC881709 |
| A/Virginia/01/2014 | 1/13/14  | 508748   |
| A/Virginia/03/2014 | 1/21/14  | 508768   |
| A/Virginia/04/2011 | 1/6/11   | KC882332 |
| A/Virginia/05/2014 | 2/10/14  | 520469   |
| A/Virginia/07/2012 | 3/9/12   | KC891342 |
| A/Virginia/09/2014 | 4/7/14   | 531819   |
| A/Virginia/11/2012 | 4/25/12  | KC891195 |
| A/Virginia/13/2012 | 8/21/12  | KF648211 |

|                            |          |          |
|----------------------------|----------|----------|
| A/Virginia/27/2009         | 12/17/09 | KC780428 |
| A/Virginia/NHRC430739/2014 | 1/23/14  | KJ889281 |
| A/Virginia/NHRC430747/2014 | 1/18/14  | KJ889275 |
| A/Virginia/WRAIR1511P/2009 | 7/28/09  | CY083242 |
| A/Washington/02/2011       | 1/5/11   | KC881610 |
| A/Washington/05/2013       | 1/18/13  | KF648260 |
| A/Washington/06/2014       | 2/13/14  | 520460   |
| A/Washington/07/2011       | 2/17/11  | KC881855 |
| A/Washington/08/2011       | 2/10/11  | KC882212 |
| A/Washington/09/2014       | 3/4/14   | 516730   |
| A/Washington/14/2012       | 2/13/12  | KC891079 |
| A/Washington/15/2012       | 2/13/12  | KC891082 |
| A/Washington/19/2012       | 2/24/12  | KC891284 |
| A/Washington/22/2012       | 3/20/12  | KC891169 |
| A/Washington/24/2012       | 6/17/12  | KC891403 |
| A/Washington/34/2012       | 7/30/12  | KC891211 |
| A/Washington/44/2012       | 8/15/12  | KC891053 |
| A/West/Virginia/01/2011    | 1/1/11   | KC881631 |
| A/West/Virginia/02/2012    | 1/31/12  | KC891033 |
| A/Wisconsin/01/2010        | 1/24/10  | KC780465 |
| A/Wisconsin/02/2010        | 2/17/10  | KC780523 |
| A/Wisconsin/02/2012        | 1/10/12  | KC891494 |
| A/Wisconsin/02/2013        | 1/2/13   | KF648109 |
| A/Wisconsin/03/2010        | 3/12/10  | KC781209 |
| A/Wisconsin/04/2014        | 2/3/14   | 509439   |
| A/Wisconsin/05/2010        | 4/1/10   | KC781377 |
| A/Wisconsin/06/2012        | 2/3/12   | KC891478 |
| A/Wisconsin/11/2011        | 2/25/11  | KC882203 |
| A/Wisconsin/11/2012        | 4/1/12   | KC891120 |
| A/Wisconsin/11/2013        | 6/23/13  | KF647992 |
| A/Wisconsin/12/2013        | 8/4/13   | KF648068 |



|                             |          |          |
|-----------------------------|----------|----------|
| A/Wisconsin/13/2013         | 9/5/13   | KJ136256 |
| A/Wisconsin/14/2012         | 5/24/12  | KC891332 |
| A/Wisconsin/16/2011         | 1/15/11  | KC881645 |
| A/Wisconsin/26/2011         | 10/16/11 | KC891025 |
| A/Wisconsin/45/2012         | 11/14/12 | KF647931 |
| A/Wisconsin/50/2009         | 9/14/09  | KC781780 |
| A/Wisconsin/629/D00008/2009 | 6/4/09   | CY051049 |
| A/Wisconsin/629/D00401/2009 | 12/8/09  | CY058024 |
| A/Wisconsin/629/D00426/2009 | 5/29/09  | CY050929 |
| A/Wisconsin/629/D00724/2009 | 6/1/09   | CY050953 |
| A/Wisconsin/629/D00941/2009 | 6/1/09   | CY050961 |
| A/Wisconsin/629/D00989/2009 | 5/17/09  | CY050398 |
| A/Wisconsin/629/D01092/2009 | 5/3/09   | CY046277 |
| A/Wisconsin/629/D01251/2009 | 5/4/09   | CY046221 |
| A/Wisconsin/629/D01482/2009 | 5/10/09  | CY050446 |
| A/Wisconsin/629/D01705/2009 | 5/3/09   | CY046373 |
| A/Wisconsin/629/D01773/2009 | 4/30/09  | CY046261 |
| A/Wisconsin/629/D01987/2009 | 9/7/09   | CY057880 |
| A/Wisconsin/629/D02028/2009 | 5/1/09   | CY046493 |
| A/Wisconsin/629/D02063/2009 | 6/18/09  | CY051169 |
| A/Wisconsin/629/D02220/2009 | 6/21/09  | CY051185 |
| A/Wisconsin/629/D02329/2009 | 10/31/09 | CY058646 |
| A/Wisconsin/629/D02337/2009 | 10/3/09  | CY057552 |
| A/Wisconsin/629/S0035/2009  | 5/26/09  | CY051249 |
| A/Wisconsin/629/S0086/2009  | 5/29/09  | CY051257 |
| A/Wisconsin/629/S0148/2009  | 6/2/09   | CY051281 |
| A/Wisconsin/629/S0173/2009  | 6/4/09   | CY051289 |
| A/Wisconsin/629/S0410/2009  | 6/23/09  | CY051481 |
| A/Wisconsin/629/S1416/2009  | 10/26/09 | CY058326 |
| A/Wyoming/01/2011           | 1/3/11   | KC882260 |
| A/Wyoming/02/2010           | 4/21/10  | KC781149 |

|                   |          |          |
|-------------------|----------|----------|
| A/Wyoming/06/2011 | 1/28/11  | KC882126 |
| A/Wyoming/06/2012 | 3/10/12  | KC891274 |
| A/Wyoming/09/2012 | 4/5/12   | KC891145 |
| A/Wyoming/23/2012 | 12/4/12  | KF647936 |
| A/Wyoming/31/2012 | 12/26/12 | KF648070 |

**Table S4. Pandemic H1N1 influenza A virus sequences (NP segment) used in this analysis (Fig. S5).** Virus name, date of viral collection, and GenBank accession number for NA sequences from 206 influenza viruses collected in swine in the United States during 2009-2014 and 221 influenza viruses collected in humans in the United States during 2009-2014. Accession numbers beginning with '5' refer to the 34 NP sequences from human influenza viruses from 2013-2014 that were downloaded from the GISAID database ([www.gisaid.org](http://www.gisaid.org)) to supplement the number of viruses from these underrepresented years.

| <b>Virus name</b>                       | <b>Date</b> | <b>Accession</b> |
|-----------------------------------------|-------------|------------------|
| A/swine/Arkansas/SG1321/2009(H1N1)      | 12/28/09    | AHB51417         |
| A/swine/Arkansas/SG1375/2011(H1N2)      | 8/17/11     | AHB21833         |
| A/swine/Arkansas/SG1376/2011(H1N2)      | 1/26/11     | AHB21845         |
| A/swine/Arkansas/SG1377/2011(H1N2)      | 4/29/11     | AHB21857         |
| A/swine/Arkansas/SG1378/2011(H1N2)      | 6/16/11     | AHB21869         |
| A/swine/Arkansas/SG1382/2011(H1N2)      | 6/14/11     | AHB24579         |
| A/swine/Arkansas/SG1383/2011(H1N2)      | 9/1/11      | AHB21881         |
| A/swine/Arkansas/SG1384/2011(H1N2)      | 7/13/11     | AHB21893         |
| A/swine/Arkansas/SG1499/2010(H1N1)      | 8/11/10     | AHB23110         |
| A/swine/California/A00968789/2013(H1N1) | 1/15/13     | AGI55593         |
| A/swine/Colorado/A01203099/2011(H1N1)   | 12/22/11    | AGF37711         |
| A/swine/Illinois/02957/2010(H1N1)       | 1/26/10     | AHB21798         |
| A/swine/Illinois/A00843191/2013(H1N2)   | 9/19/13     | AHB59487         |
| A/swine/Illinois/A00857318a/2012(H3N2)  | 2/23/12     | AFM47201         |
| A/swine/Illinois/A00857322/2012(H1N2)   | 6/12/12     | AHD25267         |
| A/swine/Illinois/A00857325/2012(H1N2)   | 6/14/12     | AGU69985         |
| A/swine/Illinois/A00857328/2012(H1N2)   | 6/14/12     | AGU69997         |
| A/swine/Illinois/A01047363/2011(H1N2)   | 1/18/11     | AFP99315         |
| A/swine/Illinois/A01047977/2011(H1N1)   | 1/17/11     | AFP99342         |
| A/swine/Illinois/A01047982/2011(H1N1)   | 1/17/11     | AFP99329         |
| A/swine/Illinois/A01047984/2011(H1N1)   | 1/17/11     | AFP99336         |
| A/swine/Illinois/A01049905/2011(H1N1)   | 4/27/11     | AFL56868         |
| A/swine/Illinois/A01125988/2012(H1N2)   | 3/4/12      | AFX69006         |
| A/swine/Illinois/A01134200/2011(H1N1)   | 1/26/11     | AFP99308         |

|                                       |          |          |
|---------------------------------------|----------|----------|
| A/swine/Illinois/A01134559/2011(H1N1) | 2/24/11  | AGN51240 |
| A/swine/Illinois/A01134580/2011(H1N2) | 2/23/11  | AGN51263 |
| A/swine/Illinois/A01158947/2012(H1N2) | 12/28/12 | AGL51641 |
| A/swine/Illinois/A01158960/2013(H1N1) | 2/8/13   | AGN51218 |
| A/swine/Illinois/A01201076/2011(H3N2) | 4/7/11   | AFO83319 |
| A/swine/Illinois/A01201077/2011(H3N2) | 4/7/11   | AGF37680 |
| A/swine/Illinois/A01201606/2011(H3N2) | 6/1/11   | AEZ02295 |
| A/swine/Illinois/A01201629/2011(H3N2) | 6/7/11   | AGC96250 |
| A/swine/Illinois/A01201631/2011(H3N2) | 6/7/11   | AFO83320 |
| A/swine/Illinois/A01202615/2011(H1N1) | 9/28/11  | AGF37698 |
| A/swine/Illinois/A01202825/2011(H3N2) | 11/9/11  | AFM84253 |
| A/swine/Illinois/A01203226/2012(H1N1) | 2/1/12   | AGG53603 |
| A/swine/Illinois/A01215870/2013(H1N2) | 5/28/13  | AGR54574 |
| A/swine/Illinois/A01241065/2012(H3N2) | 1/16/12  | AFM84302 |
| A/swine/Illinois/A01241066/2012(H3N2) | 1/16/12  | AFM84309 |
| A/swine/Illinois/A01241208/2012(H3N2) | 1/24/12  | AGG53624 |
| A/swine/Illinois/A01241212/2012(H3N2) | 1/24/12  | AGJ73204 |
| A/swine/Illinois/A01243094/2012(H1N2) | 1/30/12  | AFX69024 |
| A/swine/Illinois/A01327396/2012(H3N2) | 4/5/12   | AGS42002 |
| A/swine/Illinois/A01327868/2012(H3N2) | 5/3/12   | AGS42010 |
| A/swine/Illinois/A01328594/2012(H1N2) | 5/22/12  | AGN51198 |
| A/swine/Illinois/A01427144/2013(H3N2) | 11/6/13  | AHG27002 |
| A/swine/Illinois/A01427261/2013(H1N1) | 12/12/13 | AHJ58102 |
| A/swine/Illinois/A01427305/2013(H1N1) | 12/23/13 | AHJ58178 |
| A/swine/Illinois/A01427335/2013(H1N1) | 12/23/13 | AHJ58166 |
| A/swine/Illinois/A01427360/2013(H1N1) | 12/30/13 | AHJ58155 |
| A/swine/Indiana/04254/2011(H1N2)      | 3/31/11  | AHB21989 |
| A/swine/Indiana/13TOSU0675/2013(H1N1) | 7/1/13   | AHX38987 |
| A/swine/Indiana/13TOSU0680/2013(H1N1) | 7/1/13   | AHX38764 |
| A/swine/Indiana/13TOSU0782/2013(H1N1) | 7/1/13   | AHX38472 |
| A/swine/Indiana/13TOSU0796/2013(H1N1) | 7/1/13   | AHX39150 |

|                                       |          |          |
|---------------------------------------|----------|----------|
| A/swine/Indiana/13TOSU0802/2013(H1N1) | 7/1/13   | AHX38427 |
| A/swine/Indiana/13TOSU0815/2013(H1N1) | 7/1/13   | AHX38565 |
| A/swine/Indiana/13TOSU0820/2013(H1N1) | 7/1/13   | AHX38635 |
| A/swine/Indiana/13TOSU0824/2013(H1N1) | 7/1/13   | AHX39023 |
| A/swine/Indiana/13TOSU0832/2013(H1N1) | 7/1/13   | AHX38647 |
| A/swine/Indiana/13TOSU1051/2013(H1N1) | 7/1/13   | AHX38518 |
| A/swine/Indiana/13TOSU1148/2013(H1N1) | 7/1/13   | AHX39046 |
| A/swine/Indiana/13TOSU1154/2013(H1N1) | 7/1/13   | AHX38529 |
| A/swine/Indiana/13TOSU1157/2013(H1N1) | 7/1/13   | AHX38507 |
| A/swine/Indiana/13TOSU1159/2013(H1N1) | 7/1/13   | AHX39139 |
| A/swine/Indiana/13TOSU1207/2013(H3N2) | 7/1/13   | AHX38670 |
| A/swine/Indiana/13TOSU1217/2013(H3N2) | 7/1/13   | AHX38682 |
| A/swine/Indiana/13TOSU1316/2013(H1N1) | 8/1/13   | AHX39116 |
| A/swine/Indiana/A00968332/2011(H1N2)  | 4/7/11   | AHI97933 |
| A/swine/Indiana/A00968358/2012(H1N2)  | 2/8/12   | AHI97839 |
| A/swine/Indiana/A01049953/2011(H1N2)  | 5/7/11   | AFL56888 |
| A/swine/Indiana/A01202866/2011(H3N2)  | 11/16/11 | AFM84260 |
| A/swine/Indiana/A01202867/2011(H3N2)  | 11/16/11 | AFN69209 |
| A/swine/Indiana/A01203372/2012(H3N2)  | 4/3/12   | AGG53617 |
| A/swine/Indiana/A01260185/2013(H3N2)  | 1/3/13   | AGU69875 |
| A/swine/Indiana/A01260254/2013(H3N2)  | 3/20/13  | AGS41553 |
| A/swine/Iowa/13B092/2013(H1N2)        | 2/26/13  | AGY42377 |
| A/swine/Iowa/13B093/2013(H1N2)        | 2/26/13  | AHA98548 |
| A/swine/Iowa/13E078/2013(H1N1)        | 5/29/13  | AHB73645 |
| A/swine/Iowa/13E088/2013(H1N1)        | 5/29/13  | AHB73716 |
| A/swine/Iowa/13E100/2013(H1N1)        | 5/29/13  | AHB73680 |
| A/swine/Iowa/13H065/2013(H3N2)        | 8/28/13  | AIG46273 |
| A/swine/Iowa/13H072/2013(H1N2)        | 8/28/13  | AHC69335 |
| A/swine/Iowa/13H073/2013(H3N2)        | 8/28/13  | AIG46295 |
| A/swine/Iowa/13H076/2013(H3N2)        | 8/28/13  | AIG46262 |
| A/swine/Iowa/13H092/2013(H3N2)        | 8/28/13  | AIG46284 |

|                                        |          |          |
|----------------------------------------|----------|----------|
| A/swine/lowa/13TOSU0226/2013(H1N1)     | 7/1/13   | AHX38404 |
| A/swine/lowa/13TOSU0239/2013(H1N1)     | 7/1/13   | AHX38554 |
| A/swine/lowa/13TOSU0240/2013(H1N1)     | 7/1/13   | AHX38788 |
| A/swine/lowa/A01049750/2011(H3N2)      | 3/28/11  | AEZ01178 |
| A/swine/lowa/A01202554/2011(H1N1)      | 8/30/11  | AGF37686 |
| A/swine/lowa/A01202576/2011(H1N2)      | 9/8/11   | AGF37692 |
| A/swine/lowa/A01202613/2011(H3N2)      | 9/27/11  | AFO83019 |
| A/swine/lowa/A01202614/2011(H3N2)      | 9/27/11  | AFN66932 |
| A/swine/lowa/A01202657/2011(H3N2)      | 10/4/11  | AFN66898 |
| A/swine/lowa/A01202709/2011(H3N2)      | 10/19/11 | AEY75629 |
| A/swine/lowa/A01203121/2012(H3N2)      | 1/5/12   | AFM84274 |
| A/swine/lowa/A01203125/2012(H1N2)      | 1/6/12   | AGI55634 |
| A/swine/lowa/A01203196/2012(H3N2)      | 1/26/12  | AFO38529 |
| A/swine/lowa/A01203942/2012(H3N2)      | 10/2/12  | AGC96263 |
| A/swine/lowa/A01203943/2012(H3N2)      | 10/3/12  | AGC96257 |
| A/swine/lowa/A01267837/2012(H1N1)      | 10/17/12 | AGG53664 |
| A/swine/lowa/A01300445/2012(H3N2)      | 6/13/12  | AHI97913 |
| A/swine/lowa/A01301778/2012(H1N2)      | 9/7/12   | AGG53683 |
| A/swine/lowa/A01328941/2012(H1N1)      | 5/15/12  | AGN51271 |
| A/swine/lowa/SG1401/2011(H1N1)         | 10/5/11  | AHB22001 |
| A/swine/Kansas/10-91088/2010(H3N2)     | 12/30/10 | AEL31703 |
| A/swine/Kansas/11-101926/2011(H3N2)    | 1/19/11  | AEL31704 |
| A/swine/Kansas/11-104465/2011(H3N2)    | 2/16/11  | AEL31705 |
| A/swine/Kansas/11-104467/2011(H3N2)    | 2/16/11  | AEL31706 |
| A/swine/Kansas/11-107824/2011(H3N2)    | 3/18/11  | AEL31707 |
| A/swine/Kansas/11-109700/2011(H3N2)    | 4/2/11   | AEL31708 |
| A/swine/Kansas/11-110529/2011(H3N2)    | 4/8/11   | AEL31709 |
| A/swine/Kentucky/12TOSU1052/2012(H1N2) | 11/5/12  | AGK62588 |
| A/swine/Kentucky/12TOSU1053/2012(H1N2) | 11/5/12  | AGK62636 |
| A/swine/Kentucky/12TOSU1054/2012(H1N2) | 11/5/12  | AGK62528 |
| A/swine/Kentucky/12TOSU1084/2012(H1N2) | 11/5/12  | AGK62648 |

|                                        |          |          |
|----------------------------------------|----------|----------|
| A/swine/Kentucky/12TOSU1098/2012(H1N2) | 11/5/12  | AGK62600 |
| A/swine/Kentucky/12TOSU1155/2012(H1N2) | 11/5/12  | AGK62516 |
| A/swine/Kentucky/A01134742/2011(H1N1)  | 2/27/11  | AGN51225 |
| A/swine/Michigan/A01203498/2012(H3N2)  | 5/7/12   | AGI55603 |
| A/swine/Michigan/A01259034/2012(H3N2)  | 12/18/12 | AGJ73212 |
| A/swine/Minnesota/02979/2010(H1N1)     | 2/17/10  | AEO91827 |
| A/swine/Minnesota/0432/2010(H1N1)      | 2/10/10  | AEV21635 |
| A/swine/Minnesota/074A/2009(H1N1)      | 8/26/09  | ADU85810 |
| A/swine/Minnesota/12/2012(H1N2)        | 6/28/12  | AFX68944 |
| A/swine/Minnesota/130A/2009(H1N1)      | 9/1/09   | ADU85811 |
| A/swine/Minnesota/136B/2009(H1N1)      | 8/31/09  | ADU85813 |
| A/swine/Minnesota/165A/2009(H1N1)      | 8/28/09  | ADU85815 |
| A/swine/Minnesota/2/2012(H3N2)         | 6/5/12   | AFS50173 |
| A/swine/Minnesota/239105/2009(H3N2)    | 11/24/09 | ADY80099 |
| A/swine/Minnesota/239106/2010(H1N2)    | 5/5/10   | ADY80110 |
| A/swine/Minnesota/4/2012(H3N2)         | 6/6/12   | AFS50199 |
| A/swine/Minnesota/A00907733/2011(H3N2) | 8/4/11   | AFO83049 |
| A/swine/Minnesota/A00907734/2011(H3N2) | 8/4/11   | AFO83050 |
| A/swine/Minnesota/A01047396/2011(H3N2) | 1/13/11  | AFD32672 |
| A/swine/Minnesota/A01047604/2010(H1N2) | 12/7/10  | ADZ96079 |
| A/swine/Minnesota/A01049893/2011(H1N1) | 4/26/11  | AFL56855 |
| A/swine/Minnesota/A01116365/2011(H1N1) | 10/3/11  | AIJ10930 |
| A/swine/Minnesota/A01116381/2011(H3N2) | 10/11/11 | AFO83318 |
| A/swine/Minnesota/A01125995/2012(H3N2) | 3/8/12   | AFN69255 |
| A/swine/Minnesota/A01134332/2010(H1N2) | 9/20/10  | AGJ73163 |
| A/swine/Minnesota/A01134815/2011(H1N1) | 3/18/11  | AGN51119 |
| A/swine/Minnesota/A01201894/2011(H3N2) | 7/5/11   | AGF37749 |
| A/swine/Minnesota/A01202471/2011(H1N2) | 7/28/11  | AGI55653 |
| A/swine/Minnesota/A01202597/2011(H1N1) | 9/16/11  | AGJ73177 |
| A/swine/Minnesota/A01203313/2012(H1N1) | 3/1/12   | AHG26491 |
| A/swine/Minnesota/A01240127/2011(H3N2) | 10/10/11 | AGB84954 |

|                                                |          |          |
|------------------------------------------------|----------|----------|
| A/swine/Minnesota/A01240557/2011(H3N2)         | 12/13/11 | AGF37718 |
| A/swine/Minnesota/A01267908/2012(H1N1)         | 10/23/12 | AGG53670 |
| A/swine/Minnesota/A01270355/2012(H1N1)         | 9/26/12  | AGN51279 |
| A/swine/Minnesota/A01271731/2012(H3N2)         | 10/31/12 | AGN51104 |
| A/swine/Minnesota/A01279807/2012(H1N2)         | 12/10/12 | AHG54806 |
| A/swine/Minnesota/A01327763/2012(H3N2)         | 4/20/12  | AGL51622 |
| A/swine/Minnesota/A01327764/2012(H3N2)         | 4/20/12  | AHA56938 |
| A/swine/Minnesota/A01328944/2012(H1N2)         | 6/6/12   | AGJ73269 |
| A/swine/Minnesota/A01349281/2013(H1N2)         | 3/8/13   | AHA56930 |
| A/swine/Minnesota/SG1402/2011(H1N2)            | 10/6/11  | AHB22013 |
| A/swine/Missouri/A01203163/2012(H1N1)          | 1/17/12  | AGI55622 |
| A/swine/Missouri/A01240016/2011(H3N2)          | 11/15/11 | AFN69242 |
| A/swine/Missouri/A01240017/2011(H3N2)          | 11/15/11 | AFN69248 |
| A/swine/Missouri/A01241610/2012(H3N2)          | 2/14/12  | AFN69230 |
| A/swine/Nebraska/A01104010/2011(H3N2)          | 12/5/11  | AFD32607 |
| A/swine/Nebraska/A01104081/2014(H1N2)          | 5/12/14  | AID70642 |
| A/swine/Nebraska/A01116984/2011(H3N2)          | 11/3/11  | AFP36155 |
| A/swine/Nebraska/A01202501/2011(H1N2)          | 8/10/11  | AHZ96080 |
| A/swine/Nebraska/A01241114/2012(H3N2)          | 1/10/12  | AFN69269 |
| A/swine/Nebraska/A01241171/2012(H3N2)          | 1/16/12  | AFM84295 |
| A/swine/Nebraska/A01241785/2012(H3N2)          | 2/20/12  | AGS42046 |
| A/swine/Nebraska/A01300023/2012(H3N2)          | 6/12/12  | AHI97889 |
| A/swine/Nebraska/A01300032/2012(H3N2)          | 6/12/12  | AHH00814 |
| A/swine/Nebraska/A01327581/2012(H3N2)          | 4/16/12  | AHA38255 |
| A/swine/Nebraska/A01327747/2012(H3N2)          | 4/26/12  | AGS41994 |
| A/swine/North<br>Carolina/A01048807/2011(H1N2) | 11/15/11 | AGF37666 |
| A/swine/North<br>Carolina/A01290378/2013(H1N1) | 8/20/13  | AHG54771 |
| A/swine/North Carolina/SG1391/2011(H1N2)       | 3/30/11  | AHB21965 |
| A/swine/OH/9838/2011(H1N1)                     | 2/21/11  | AEF29004 |



|                                           |          |          |
|-------------------------------------------|----------|----------|
| A/swine/Ohio/13TOSU0733/2013(H1N1)        | 7/1/13   | AHX38461 |
| A/swine/Ohio/13TOSU0735/2013(H1N1)        | 7/1/13   | AHX38215 |
| A/swine/Ohio/13TOSU0736/2013(H1N1)        | 7/1/13   | AHX38392 |
| A/swine/Ohio/13TOSU0888/2013(H1N2)        | 7/1/13   | AHX38346 |
| A/swine/Ohio/13TOSU1238/2013(H3N2)        | 7/1/13   | AHX38369 |
| A/swine/Ohio/13TOSU1522/2013(H1N1)        | 8/1/13   | AHX38658 |
| A/swine/Ohio/13TOSU1529/2013(H1N1)        | 8/1/13   | AHX38741 |
| A/swine/Ohio/13TOSU1674/2013(H1N1)        | 8/1/13   | AHX38450 |
| A/swine/Ohio/13TOSU1948/2013(H1N1)        | 8/1/13   | AHX38940 |
| A/swine/Ohio/13TOSU1958/2013(H1N1)        | 8/1/13   | AHX38540 |
| A/swine/Ohio/13TOSU2106/2013(H1N1)        | 8/1/13   | AHX38799 |
| A/swine/Ohio/13TOSU2115/2013(H1N1)        | 8/1/13   | AHX38857 |
| A/swine/Ohio/13TOSU2130/2013(H3N2)        | 8/1/13   | AHX38929 |
| A/swine/Ohio/13TOSU2132/2013(H3N2)        | 8/1/13   | AHX38311 |
| A/swine/Oklahoma/02989/2010(H1N1)         | 3/12/10  | AHB24446 |
| A/swine/Oklahoma/SG1498/2010(H3N2)        | 11/11/10 | AHB24826 |
| A/swine/Pennsylvania/a01076502/2010(H3N2) | 9/20/10  | AFH41314 |
| A/swine/Pennsylvania/a01076503/2010(H3N2) | 9/20/10  | AFH41304 |
| A/swine/Texas/13TOSU0035/2013(H1N1)       | 2/1/13   | AHX38577 |
| A/swine/Texas/13TOSU0050/2013(H1N1)       | 2/1/13   | AHX38204 |
| A/swine/Texas/13TOSU6273/2013(H1N2)       | 10/1/13  | AHX38287 |
| A/swine/Texas/13TOSU6276/2013(H1N2)       | 10/1/13  | AHX39058 |
| A/swine/Texas/A01049555/2011(H3N2)        | 2/14/11  | AEZ01176 |
| A/swine/Texas/A01049556/2011(H3N2)        | 2/14/11  | AEZ01177 |
| A/swine/Texas/A01049914/2011(H3N2)        | 4/28/11  | AEZ01179 |
| A/swine/Texas/A01049915/2011(H3N2)        | 4/28/11  | AEZ01180 |
| A/swine/Texas/A01104003/2011(H1N1)        | 7/16/11  | AEP33168 |
| A/swine/Texas/A01104004/2011(H1N1)        | 7/16/11  | AEP33158 |
| A/swine/Texas/SG1380/2011(H1N1)           | 10/6/11  | AHB22453 |
| A/Alabama/01/2010                         | 1/4/10   | KC781899 |
| A/Alabama/03/2010                         | 3/1/10   | KC781167 |

|                            |          |          |
|----------------------------|----------|----------|
| A/Alaska/01/2010           | 2/7/10   | KC781386 |
| A/Arizona/06/2009          | 4/28/09  | GQ232036 |
| A/Bethesda/NIH106/D14/2009 | 11/5/09  | HQ263276 |
| A/Boston/125/2009          | 6/17/09  | CY064575 |
| A/Boston/145/2009          | 7/9/09   | CY063513 |
| A/Boston/DOA08/2011        | 1/13/11  | CY134468 |
| A/Boston/DOA14/2011        | 1/19/11  | CY111209 |
| A/Boston/DOA2/099/2012     | 12/23/12 | CY148319 |
| A/Boston/DOA30/2011        | 1/27/11  | CY134492 |
| A/Boston/DOA34/2011        | 2/7/11   | CY134500 |
| A/Boston/DOA93/2012        | 3/26/12  | CY125786 |
| A/Boston/YGA/02024/2013    | 1/7/13   | CY170258 |
| A/Bronx/INS3/673/2012      | 3/6/12   | CY176693 |
| A/Bronx/INS3/674/2012      | 3/21/12  | CY176701 |
| A/Brooklyn/INS549/2011     | 3/24/11  | CY129657 |
| A/Brownsville/35H/2009     | 5/27/09  | CY053249 |
| A/Brownsville/35OS/2009    | 5/27/09  | CY053241 |
| A/Brownsville/43H/2009     | 6/2/09   | CY053304 |
| A/California/01/2014       | 1/6/14   | 509441   |
| A/California/06/2010       | 4/5/10   | KC780143 |
| A/California/06/2014       | 2/3/14   | 511882   |
| A/California/07/JRO08/2009 | 4/9/09   | CY181412 |
| A/California/08/2009       | 4/9/09   | KC780063 |
| A/California/20/2011       | 2/21/11  | KC882267 |
| A/California/59/2013       | 12/30/13 | 508612   |
| A/California/NHRC0001/2011 | 1/28/11  | CY092883 |
| A/California/VRDL101/2009  | 11/5/09  | CY063166 |
| A/California/VRDL115/2009  | 12/4/09  | CY066298 |
| A/California/VRDL13/2010   | 1/25/10  | CY063206 |
| A/California/VRDL18/2009   | 6/22/09  | CY055474 |
| A/California/VRDL2/2010    | 1/11/10  | CY066458 |

|                                       |          |          |
|---------------------------------------|----------|----------|
| A/California/VRDL3/2010               | 1/19/10  | CY066466 |
| A/California/VRDL35/2009              | 7/5/09   | CY054878 |
| A/California/VRDL36/2009              | 9/24/09  | CY054886 |
| A/California/VRDL65/2009              | 8/10/09  | CY055014 |
| A/California/VRDL96/2009              | 10/29/09 | CY063126 |
| A/California/WR1320P/2009             | 8/7/09   | CY071531 |
| A/Chicago/YGA/04019/2012              | 12/7/12  | CY171162 |
| A/Chicago/YGA/04123/2012              | 12/30/12 | CY171546 |
| A/Colorado/03/2009                    | 4/27/09  | GQ117117 |
| A/Colorado/07/2014                    | 3/25/14  | 534008   |
| A/Colorado/11/2010                    | 12/29/10 | KC882310 |
| A/Dayton/INS3/634/2011                | 1/21/11  | CY176445 |
| A/Dayton/INS3/676/2012                | 3/12/12  | CY176717 |
| A/Delaware/04/2011                    | 2/4/11   | KC882309 |
| A/Delaware/06/2011                    | 2/4/11   | KC882355 |
| A/Delaware/08/2011                    | 2/12/11  | KC882410 |
| A/District/of/Columbia/INS114/2009    | 11/4/09  | CY062686 |
| A/District/of/Columbia/INS22/2009     | 10/29/09 | CY083650 |
| A/District/of/Columbia/INS32/2009     | 10/26/09 | CY064767 |
| A/District/of/Columbia/INS527/2010    | 2/23/10  | CY096597 |
| A/District/of/Columbia/INS600/2011    | 1/10/11  | CY129873 |
| A/District/of/Columbia/INS601/2011    | 1/13/11  | CY129881 |
| A/District/of/Columbia/WRAIR0306/2010 | 12/28/10 | CY097814 |
| A/District/of/Columbia/WRAIR313/2011  | 1/28/11  | CY090028 |
| A/Florida/01/2014                     | 1/3/14   | 503390   |
| A/Florida/02/2010                     | 2/2/10   | KC780534 |
| A/Florida/06/2012                     | 2/27/12  | JX905430 |
| A/Gainesville/05/2014                 | 1/15/14  | KJ645770 |
| A/Gainesville/08/2013                 | 12/4/13  | KJ645762 |
| A/Georgia/F32551/2012                 | 2/1/12   | CY148262 |
| A/Georgia/M5081/2012                  | 2/1/12   | CY147974 |

|                           |          |          |
|---------------------------|----------|----------|
| A/Georgia/NHRC0001/2011   | 1/27/11  | CY092907 |
| A/Georgia/T51700/2012     | 2/1/12   | CY148254 |
| A/Hawaii/03/2013          | 12/15/13 | 507523   |
| A/Hawaii/03/2014          | 2/22/14  | 534029   |
| A/Hawaii/04/2014          | 2/23/14  | 534021   |
| A/Houston/14H/2009        | 5/1/09   | CY053090 |
| A/Houston/15H/2009        | 5/1/09   | CY053106 |
| A/Houston/22H/2009        | 5/4/09   | CY053153 |
| A/Houston/3OS/2009        | 5/18/09  | CY052986 |
| A/Houston/9OS/2009        | 5/21/09  | CY051922 |
| A/Houston/JMM/122/2013    | 1/8/13   | CY183148 |
| A/Illinois/NHRC0001/2011  | 1/26/11  | CY092875 |
| A/Indiana/03/2010         | 2/3/10   | KC780692 |
| A/Indiana/04/2011         | 1/19/11  | KC882321 |
| A/Iowa/01/2010            | 1/5/10   | KC782018 |
| A/Kentucky/09/2010        | 11/1/10  | KC882051 |
| A/Kentucky/136/2009       | 12/11/09 | JX875026 |
| A/Kentucky/180/2010       | 4/1/10   | JX875032 |
| A/Los/Angeles/INS423/2010 | 2/5/10   | CY083820 |
| A/Louisiana/07/2013       | 10/7/13  | 485772   |
| A/Louisiana/13/2013       | 11/11/13 | 492798   |
| A/Maryland/04/2011        | 2/2/11   | KC882384 |
| A/Maryland/04/2014        | 2/3/14   | 510138   |
| A/Maryland/05/2009        | 4/29/09  | GQ160561 |
| A/Maryland/07/2011        | 2/25/11  | KC882406 |
| A/Maryland/08/2011        | 3/2/11   | KC882396 |
| A/Maryland/08/2013        | 10/7/13  | 508429   |
| A/Maryland/13/2012        | 4/1/12   | 393750   |
| A/Maryland/20/2013        | 11/29/13 | 501423   |
| A/Massachusetts/15/2013   | 11/13/13 | 507646   |
| A/Michigan/01/2010        | 1/27/10  | KC781447 |

|                             |          |          |
|-----------------------------|----------|----------|
| A/Michigan/03/2011          | 3/30/11  | KC882279 |
| A/Michigan/06/2009          | 5/2/09   | GQ323503 |
| A/Minneapolis/INS3/675/2012 | 2/27/12  | CY176709 |
| A/Minnesota/03/2011         | 2/18/11  | KC881971 |
| A/Minnesota/16/2009         | 8/28/09  | KC782314 |
| A/Mississippi/01/2009       | 5/13/09  | KC781318 |
| A/Mississippi/09/2013       | 10/12/13 | 503457   |
| A/Mississippi/10/2013       | 10/21/13 | 507632   |
| A/Mississippi/11/2013       | 11/4/13  | 492806   |
| A/Mississippi/28/2013       | 12/7/13  | 498192   |
| A/Mississippi/29/2013       | 11/18/13 | 498184   |
| A/Missouri/02/2014          | 2/7/14   | 516716   |
| A/Missouri/NHRC0001/2011    | 1/25/11  | CY092420 |
| A/Montana/01/2010           | 4/4/10   | KC782122 |
| A/Montana/03/2010           | 4/7/10   | KC781286 |
| A/Nevada/01/2014            | 1/1/14   | 503422   |
| A/Nevada/24/2013            | 12/19/13 | 503450   |
| A/New Hampshire/04/2013     | 9/17/13  | 498059   |
| A/New Jersey/01/2010        | 1/1/10   | KC780544 |
| A/New Mexico/05/2011        | 2/9/11   | KC881942 |
| A/New Mexico/06/2011        | 2/21/11  | KC881936 |
| A/New York/03/2010          | 2/9/10   | KC780457 |
| A/New York/18/2009          | 4/25/09  | FJ984352 |
| A/New York/22/2009          | 4/24/09  | GQ117019 |
| A/New York/2598/2010        | 1/20/10  | CY062117 |
| A/New York/2648/2010        | 1/22/10  | CY062125 |
| A/New York/2960/2010        | 1/26/10  | CY062141 |
| A/New York/3186/2009        | 4/26/09  | CY041173 |
| A/New York/3265/2009        | 4/29/09  | CY040865 |
| A/New York/34/2012          | 4/17/12  | KC891579 |
| A/New York/3528/2009        | 5/19/09  | CY044139 |

|                          |          |          |
|--------------------------|----------|----------|
| A/New York/3681/2010     | 2/1/10   | CY064998 |
| A/New York/3753/2009     | 6/1/09   | CY047377 |
| A/New York/3835/2010     | 1/27/10  | CY065030 |
| A/New York/3976/2009     | 6/8/09   | CY052133 |
| A/New York/4052/2009     | 6/9/09   | CY045056 |
| A/New York/4057/2009     | 6/8/09   | CY045210 |
| A/New York/4095/2009     | 6/12/09  | CY050161 |
| A/New York/4400/2009     | 6/25/09  | CY051530 |
| A/New York/4565/2009     | 7/8/09   | CY051594 |
| A/New York/4691/2009     | 6/30/09  | CY051650 |
| A/New York/4977/2009     | 10/3/09  | CY055434 |
| A/New York/4988/2009     | 10/6/09  | CY056470 |
| A/New York/58/2009       | 5/23/09  | GQ338334 |
| A/New York/5916/2009     | 11/6/09  | CY056598 |
| A/New York/6607/2009     | 11/24/09 | CY056750 |
| A/New York/6937/2009     | 12/11/09 | CY061925 |
| A/New York/6977/2009     | 12/11/09 | CY061981 |
| A/New York/INS317/2009   | 12/17/09 | CY072321 |
| A/New York/INS432/2010   | 1/14/10  | CY072537 |
| A/North Carolina/02/2011 | 1/27/11  | KC881771 |
| A/North Carolina/06/2011 | 1/20/11  | KC882243 |
| A/North Carolina/07/2011 | 1/15/11  | KC881712 |
| A/North Carolina/09/2011 | 1/20/11  | KC881666 |
| A/North Carolina/09/2012 | 3/1/12   | KC891257 |
| A/North Carolina/18/2012 | 4/26/12  | KC891303 |
| A/Oregon/04/2009         | 4/27/09  | GQ338352 |
| A/Pennsylvania/01/2014   | 1/12/14  | 511871   |
| A/Pennsylvania/02/2011   | 2/22/11  | KC881987 |
| A/Pennsylvania/03/2014   | 1/22/14  | 509939   |
| A/Pennsylvania/07/2013   | 10/2/13  | 507654   |
| A/Rhode/Island/09/2013   | 12/22/13 | 503863   |

|                                   |          |          |
|-----------------------------------|----------|----------|
| A/Rochester/INS599/2011           | 3/18/11  | CY129538 |
| A/San/Diego/INS05/2009            | 10/12/09 | CY055983 |
| A/San/Diego/INS08/2009            | 10/13/09 | CY057337 |
| A/San/Diego/INS09/2009            | 10/13/09 | CY055999 |
| A/San/Diego/INS103/2009           | 10/19/09 | CY061246 |
| A/San/Diego/INS218/2009           | 10/28/09 | CY066818 |
| A/San/Diego/INS65/2009            | 10/28/09 | CY056934 |
| A/San/Diego/WRAIR1665P/2009       | 9/23/09  | CY083408 |
| A/Santa/Clara/YGA/03030/2013      | 1/8/13   | CY170674 |
| A/Silver/Spring/WRAIRSP510P3/2009 | 6/18/09  | CY073303 |
| A/South Carolina/NHRC0002/2011    | 1/29/11  | CY092899 |
| A/South Carolina/WRAIR1645P/2009  | 7/17/09  | CY097885 |
| A/Springfield/INS3/652/2011       | 2/4/11   | CY176565 |
| A/Springfield/INS598/2011         | 2/16/11  | CY129865 |
| A/Tennessee/18/2009               | 10/10/09 | KC782175 |
| A/Tennessee/F1074/2010            | 3/15/10  | CY167415 |
| A/Tennessee/F2085/2011            | 3/17/11  | CY167312 |
| A/Texas/06/2009                   | 4/23/09  | FJ984384 |
| A/Texas/07/2009                   | 4/25/09  | GQ117087 |
| A/Texas/09/2011                   | 3/1/11   | KC881654 |
| A/Texas/09/2014                   | 1/18/14  | 507532   |
| A/Texas/22/2012                   | 2/26/12  | KC891537 |
| A/Texas/23/2012                   | 1/26/12  | KC891553 |
| A/Texas/26/2012                   | 2/21/12  | KC891567 |
| A/Texas/42281289/2009             | 6/28/09  | CY052189 |
| A/Texas/45091405/2009             | 9/9/09   | CY052730 |
| A/Texas/45103259/2009             | 9/10/09  | CY052650 |
| A/Texas/JMM/52/2012               | 12/6/12  | CY135111 |
| A/Texas/JMM/53/2012               | 12/6/12  | CY135119 |
| A/Texas/JMS392/2009               | 12/25/09 | CY061054 |
| A/Texas/JMS401/2010               | 1/3/10   | CY061581 |

|                             |          |          |
|-----------------------------|----------|----------|
| A/Texas/JMS402/2010         | 1/4/10   | CY061110 |
| A/Texas/JMS406/2010         | 1/10/10  | CY061134 |
| A/Texas/JMS407/2010         | 1/11/10  | CY061142 |
| A/Texas/JMS415/2010         | 2/6/10   | CY061206 |
| A/Utah/03/2010              | 3/8/10   | KC781404 |
| A/Utah/10/2013              | 10/29/13 | 487725   |
| A/Virginia/01/2010          | 1/21/10  | KC780580 |
| A/Virginia/04/2011          | 1/6/11   | KC882358 |
| A/Virginia/06/2014          | 3/4/14   | 516304   |
| A/Washington/01/2010        | 4/2/10   | KC781294 |
| A/Washington/05/2014        | 2/8/14   | 511893   |
| A/Washington/07/2014        | 2/10/14  | 516414   |
| A/Washington/24/2012        | 6/17/12  | 394885   |
| A/Wisconsin/01/2010         | 1/24/10  | KC780494 |
| A/Wisconsin/02/2010         | 2/17/10  | KC780520 |
| A/Wisconsin/10/2009         | 5/4/09   | GQ232072 |
| A/Wisconsin/15/2011         | 2/14/11  | KC881690 |
| A/Wisconsin/16/2011         | 1/15/11  | KC881644 |
| A/Wisconsin/18/2011         | 2/6/11   | KC881685 |
| A/Wisconsin/629/D00396/2009 | 5/4/09   | CY046878 |
| A/Wisconsin/629/D00426/2009 | 5/29/09  | CY050930 |
| A/Wisconsin/629/D00888/2009 | 11/2/09  | CY063278 |
| A/Wisconsin/629/D01026/2009 | 5/28/09  | CY046798 |
| A/Wisconsin/629/D01521/2009 | 5/20/09  | CY046734 |
| A/Wisconsin/629/D01570/2009 | 11/5/09  | CY057753 |
| A/Wisconsin/629/D01591/2009 | 12/7/09  | CY058399 |
| A/Wisconsin/629/D01667/2009 | 11/29/09 | CY090043 |
| A/Wisconsin/629/D02028/2009 | 5/1/09   | CY046494 |
| A/Wisconsin/629/S0201/2009  | 6/8/09   | CY051314 |
| A/Wisconsin/629/S0222/2009  | 6/9/09   | CY051346 |
| A/Wisconsin/629/S1407/2009  | 10/22/09 | CY057713 |



A/Wisconsin/629/S1433/2009

10/27/09 CY058623

A/Wurzburg/INS578/2010

1/18/10 CY129502

**Table S5.** Estimated transitions between humans and swine on HA MCC phylogeny, represented by ‘Markov jumps’. Values presented in Fig. S4.

|         | <b>hu08-09</b> | <b>hu09-10</b> | <b>hu10-11</b> | <b>hu11-12</b> | <b>hu12-13</b> | <b>hu13-14</b> | <b>sw09-10</b> | <b>sw10-11</b> | <b>sw11-12</b> | <b>sw12-13</b> | <b>sw13-14</b> |
|---------|----------------|----------------|----------------|----------------|----------------|----------------|----------------|----------------|----------------|----------------|----------------|
| hu08-09 | -              | 9.562          | 0.203          | 4.16E-02       | 0.113          | 4.03E-02       | 1.783          | 0.947          | 0.111          | 9.33E-02       | 3.98E-02       |
| hu09-10 | 5.628          | -              | 9.059          | 9.72E-02       | 0.568          | 9.65E-02       | 30.916         | 14.984         | 0.816          | 0.271          | 9.51E-02       |
| hu10-11 | 6.10E-02       | 2.088          | -              | 8.78           | 2.021          | 5.96E-02       | 0.11           | 9.322          | 2.448          | 0.105          | 6.02E-02       |
| hu11-12 | 2.88E-02       | 3.04E-02       | 4.71E-02       | -              | 7.181          | 0.29           | 3.46E-02       | 0.174          | 0.226          | 6.76E-02       | 3.44E-02       |
| hu12-13 | 2.93E-02       | 2.93E-02       | 4.22E-02       | 0.75           | -              | 12.807         | 3.38E-02       | 6.04E-02       | 9.09E-02       | 4.224          | 0.616          |
| hu13-14 | 1.29E-02       | 1.41E-02       | 2.41E-02       | 1.95E-02       | 0.468          | -              | 1.77E-02       | 3.94E-02       | 6.17E-02       | 5.28E-02       | 12.983         |
| sw09-10 | 8.71E-02       | 1.292          | 0.272          | 7.43E-02       | 0.161          | 7.95E-02       | -              | 5.141          | 1.49           | 0.542          | 7.42E-02       |
| sw10-11 | 5.46E-02       | 7.59E-02       | 1.389          | 0.193          | 0.192          | 5.87E-02       | 0.369          | -              | 2.696          | 0.634          | 6.54E-02       |
| sw11-12 | 1.56E-02       | 1.75E-02       | 3.58E-02       | 7.74E-02       | 0.114          | 2.59E-02       | 2.30E-02       | 9.22E-02       | -              | 8.11E-02       | 2.52E-02       |
| sw12-13 | 2.07E-02       | 2.24E-02       | 4.01E-02       | 3.21E-02       | 0.101          | 3.17E-02       | 3.03E-02       | 6.81E-02       | 9.80E-02       |                | 0.955          |
| sw13-14 | 1.53E-02       | 1.67E-02       | 3.50E-02       | 2.64E-02       | 9.46E-02       | 0.596          | 2.30E-02       | 5.50E-02       | 9.61E-02       | 9.21E-02       |                |

**Table S6.** Estimated transitions between humans and swine, on NA MCC phylogeny, represented by 'Markov jumps'. Values presented in Fig. 2a.

|         | hu08-09 | hu09-10 | hu10-11 | hu11-12 | hu12-13 | hu13-14 | sw08-09 | sw09-10 | sw10-11 | sw11-12 | sw12-13 | sw13-14 |
|---------|---------|---------|---------|---------|---------|---------|---------|---------|---------|---------|---------|---------|
| hu08-09 | -       | 10.59   | 0.08    | 0.04    | 0.04    | 0.07    | 0.53    | 2.11    | 0.67    | 0.10    | 0.06    | 0.09    |
| hu09-10 | 1.23    | -       | 6.71    | 0.09    | 0.10    | 0.41    | 2.41    | 27.86   | 17.55   | 1.01    | 0.14    | 0.24    |
| hu10-11 | 0.04    | 1.02    | -       | 8.04    | 0.20    | 0.10    | 0.04    | 0.06    | 9.53    | 2.64    | 0.07    | 0.13    |
| hu11-12 | 0.01    | 0.02    | 0.10    | -       | 9.66    | 0.05    | 0.01    | 0.02    | 0.04    | 0.09    | 0.04    | 0.06    |
| hu12-13 | 0.02    | 0.02    | 0.03    | 0.24    | -       | 12.40   | 0.02    | 0.03    | 0.05    | 0.07    | 4.47    | 0.62    |
| hu13-14 | 0.01    | 0.01    | 0.02    | 0.02    | 0.74    | -       | 0.01    | 0.02    | 0.04    | 0.06    | 0.04    | 13.42   |
| sw08-09 | 0.01    | 0.12    | 0.04    | 0.03    | 0.03    | 0.06    | -       | 0.59    | 0.07    | 0.09    | 0.05    | 0.09    |
| sw09-10 | 0.04    | 0.25    | 0.20    | 0.04    | 0.05    | 0.09    | 0.29    | -       | 5.63    | 0.30    | 0.07    | 0.22    |
| sw10-11 | 0.06    | 0.13    | 2.40    | 0.10    | 0.09    | 0.13    | 0.07    | 0.21    | -       | 3.72    | 0.65    | 0.59    |
| sw11-12 | 0.01    | 0.02    | 0.04    | 0.04    | 0.03    | 0.06    | 0.01    | 0.03    | 0.08    | -       | 0.05    | 0.20    |
| sw12-13 | 0.01    | 0.02    | 0.03    | 0.03    | 0.67    | 0.06    | 0.01    | 0.03    | 0.06    | 0.08    | -       | 1.26    |
| sw13-14 | 0.01    | 0.01    | 0.03    | 0.02    | 0.03    | 0.37    | 0.01    | 0.02    | 0.06    | 0.09    | 0.06    | -       |

**Table S7.** Estimated transitions between humans and swine on NP MCC phylogeny represented by 'Markov jumps'. Values presented in Fig. 2b.

|         | <b>hu08-09</b> | <b>hu09-10</b> | <b>hu10-11</b> | <b>hu11-12</b> | <b>hu12-13</b> | <b>hu13-14</b> | <b>sw08-09</b> | <b>sw09-10</b> | <b>sw10-11</b> | <b>sw11-12</b> | <b>sw12-13</b> | <b>sw13-14</b> |
|---------|----------------|----------------|----------------|----------------|----------------|----------------|----------------|----------------|----------------|----------------|----------------|----------------|
| hu08-09 | -              | 7.29           | 0.10           | 0.03           | 0.04           | 0.04           | 0.10           | 0.37           | 0.84           | 0.29           | 0.08           | 0.07           |
| hu09-10 | 0.82           | -              | 5.31           | 0.04           | 0.05           | 0.05           | 1.01           | 4.62           | 0.89           | 0.49           | 0.08           | 0.07           |
| hu10-11 | 0.04           | 0.05           | -              | 3.07           | 1.82           | 0.08           | 0.04           | 0.07           | 3.74           | 0.90           | 0.09           | 0.09           |
| hu11-12 | 0.02           | 0.03           | 0.04           | -              | 0.06           | 0.76           | 0.02           | 0.03           | 0.06           | 0.10           | 0.08           | 0.07           |
| hu12-13 | 0.01           | 0.01           | 0.03           | 0.02           | -              | 1.98           | 0.01           | 0.01           | 0.04           | 0.08           | 0.06           | 0.06           |
| hu13-14 | 0.00           | 0.01           | 0.02           | 0.01           | 0.09           | -              | 0.00           | 0.01           | 0.04           | 0.07           | 0.05           | 0.05           |
| sw08-09 | 0.02           | 1.00           | 0.04           | 0.03           | 0.04           | 0.04           | -              | 1.19           | 0.47           | 0.64           | 0.08           | 0.08           |
| sw09-10 | 0.05           | 0.06           | 0.88           | 0.06           | 0.07           | 0.07           | 0.16           | -              | 4.87           | 2.08           | 0.57           | 0.10           |
| sw10-11 | 0.04           | 0.05           | 0.93           | 0.05           | 0.06           | 0.06           | 0.04           | 0.21           | -              | 27.83          | 1.80           | 1.22           |
| sw11-12 | 0.03           | 0.03           | 0.04           | 0.04           | 0.04           | 0.04           | 0.03           | 0.04           | 0.26           | -              | 12.39          | 0.91           |
| sw12-13 | 0.01           | 0.01           | 0.03           | 0.02           | 0.03           | 0.03           | 0.01           | 0.02           | 0.04           | 1.03           | -              | 2.34           |
| sw13-14 | 0.00           | 0.01           | 0.02           | 0.02           | 0.03           | 0.03           | 0.00           | 0.01           | 0.04           | 0.09           | 0.91           | -              |

**Table S8.** Evolutionary origins of each genome segment for 444 US swine viruses collected during 2009-2014.

| <b>Virus name</b>                                    | <b>PB2</b> | <b>PB1</b> | <b>PA</b> | <b>HA</b> | <b>NP</b> | <b>NA</b> | <b>MP</b> | <b>NS</b> |
|------------------------------------------------------|------------|------------|-----------|-----------|-----------|-----------|-----------|-----------|
| A/swine/Indiana/240218/2010/H1N2--2010-02-21         | pdm        | pdm        | pdm       | H1beta    | trig      | N2-1998   | pdm       | pdm       |
| A/swine/North Carolina/SG1357/2010/H1N2--2010-01-13  | pdm        | pdm        | pdm       | H1delta1  | trig      | N2-1998   | pdm       | pdm       |
| A/swine/Kansas/12-117893/2012/H1N2--2012-11-         | pdm        | pdm        | pdm       | H1delta2  | pdm       | N2-2002   | pdm       | pdm       |
| A/swine/Minnesota/A01047604/2010/H1N2--2010-12-07    | pdm        | pdm        | pdm       | H1delta2  | pdm       | N2-2002   | pdm       | pdm       |
| A/swine/Minnesota/A01116365/2011/H1N1--2011-10-03    | pdm        | pdm        | pdm       | H1delta2  | pdm       | pdm       | pdm       | pdm       |
| A/swine/Minnesota/A01134332/2010/H1N2--2010-09-20    | pdm        | pdm        | pdm       | H1delta2  | pdm       | N2-2002   | pdm       | pdm       |
| A/swine/Illinois/A01202615/2011/H1N1--2011-09-28     | pdm        | pdm        | pdm       | H1gam1    | pdm       | classical | pdm       | pdm       |
| A/swine/Iowa/A01202613/2011/H3N2--2011-09-27         | pdm        | pdm        | pdm       | H3        | pdm       | N2-2002   | pdm       | pdm       |
| A/swine/Iowa/A01202614/2011/H3N2--2011-09-27         | pdm        | pdm        | pdm       | H3        | pdm       | N2-2002   | pdm       | pdm       |
| A/swine/Minnesota/239106/2010/H1N2--2010-05-05       | pdm        | trig       | pdm       | H1delta2  | pdm       | N2-2002   | pdm       | pdm       |
| A/swine/Kansas/11-107824/2011/H3N2--2011-03-18       | pdm        | trig       | pdm       | H3        | pdm       | N2-1998   | pdm       | pdm       |
| A/swine/Minnesota/A01049893/2011/H1N1--2011-04-26    | pdm        | trig       | pdm       | H1gam1    | pdm       | classical | trig      | pdm       |
| A/swine/Illinois/A01049980/2011/H1N1--2011-05-17     | pdm        | pdm        | pdm       | H1gam1    | trig      | classical | pdm       | trig      |
| A/swine/Illinois/A01049981/2011/H1N1--2011-05-17     | pdm        | pdm        | pdm       | H1gam1    | trig      | classical | pdm       | trig      |
| A/swine/Illinois/A01158996/2013/H1N1--2013-05-02     | pdm        | pdm        | pdm       | H1gam1    | trig      | classical | pdm       | trig      |
| A/swine/Illinois/A01227424/2013/H1N1--2013-09-06     | pdm        | pdm        | pdm       | H1gam1    | trig      | classical | pdm       | trig      |
| A/swine/Illinois/A01301791/2012/H1N1--2012-09-14     | pdm        | pdm        | pdm       | H1gam1    | trig      | classical | pdm       | trig      |
| A/swine/Illinois/A01427210/2013/H1N1--2013-11-26     | pdm        | pdm        | pdm       | H1gam1    | trig      | classical | pdm       | trig      |
| A/swine/Iowa/A01049894/2011/H1N1--2011-04-26         | pdm        | pdm        | pdm       | H1gam1    | trig      | classical | pdm       | trig      |
| A/swine/Iowa/A01049950/2011/H1N1--2011-05-06         | pdm        | pdm        | pdm       | H1gam1    | trig      | classical | pdm       | trig      |
| A/swine/Iowa/A01202023/2011/H1N1--2011-05-26         | pdm        | pdm        | pdm       | H1gam1    | trig      | classical | pdm       | trig      |
| A/swine/North Dakota/A01104053/2012/H1N1--2012-10-26 | pdm        | pdm        | pdm       | H1gam1    | trig      | classical | pdm       | trig      |
| A/swine/Pennsylvania/a01076502/2010/H3N2--2010-09-20 | pdm        | pdm        | pdm       | H3        | pdm       | N2-2002   | pdm       | trig      |
| A/swine/Pennsylvania/a01076503/2010/H3N2--2010-09-20 | pdm        | pdm        | pdm       | H3        | pdm       | N2-2002   | pdm       | trig      |
| A/swine/Illinois/A00857135/2011/H1N1--2011-10-07     | pdm        | trig       | pdm       | H1gam1    | trig      | classical | pdm       | trig      |
| A/swine/Illinois/A00857317F/2012/H1N1--2012-01-25    | pdm        | trig       | pdm       | H1gam1    | trig      | classical | pdm       | trig      |
| A/swine/Illinois/A01104011/2012/H1N1--2012-01-25     | pdm        | trig       | pdm       | H1gam1    | trig      | classical | pdm       | trig      |

|                                                   |      |      |      |          |      |           |     |      |
|---------------------------------------------------|------|------|------|----------|------|-----------|-----|------|
| A/swine/Illinois/A01104012/2012/H1N1--2012-01-25  | pdm  | trig | pdm  | H1gam1   | trig | classical | pdm | trig |
| A/swine/Indiana/A01202866/2011/H3N2--2011-11-16   | pdm  | trig | pdm  | H3       | pdm  | N2-2002   | pdm | trig |
| A/swine/Indiana/A01202867/2011/H3N2--2011-11-16   | pdm  | trig | pdm  | H3       | pdm  | N2-2002   | pdm | trig |
| A/swine/Indiana/A01260185/2013/H3N2--2013-01-03   | pdm  | trig | pdm  | H3       | pdm  | N2-2002   | pdm | trig |
| A/swine/Iowa/A01202709/2011/H3N2--2011-10-19      | pdm  | trig | pdm  | H3       | pdm  | N2-2002   | pdm | trig |
| A/swine/Michigan/A01259034/2012/H3N2--2012-12-18  | pdm  | trig | pdm  | H3       | pdm  | N2-2002   | pdm | trig |
| A/swine/Minnesota/2/2012/H3N2--2012-06-05         | pdm  | trig | pdm  | H3       | pdm  | N2-2002   | pdm | trig |
| A/swine/Nebraska/A01116984/2011/H3N2--2011-11-03  | pdm  | trig | trig | H3       | pdm  | N2-1998   | pdm | trig |
| A/swine/Illinois/A01201606/2011/H3N2--2011-06-01  | trig | pdm  | pdm  | H3       | pdm  | N2-2002   | pdm | pdm  |
| A/swine/Illinois/A01201629/2011/H3N2--2011-06-07  | trig | pdm  | pdm  | H3       | pdm  | N2-2002   | pdm | pdm  |
| A/swine/Illinois/A01201631/2011/H3N2--2011-06-07  | trig | pdm  | pdm  | H3       | pdm  | N2-2002   | pdm | pdm  |
| A/swine/Iowa/A01203196/2012/H3N2--2012-01-26      | trig | pdm  | pdm  | H3       | pdm  | N2-2002   | pdm | pdm  |
| A/swine/Iowa/A01203942/2012/H3N2--2012-10-02      | trig | pdm  | pdm  | H3       | pdm  | N2-2002   | pdm | pdm  |
| A/swine/Minnesota/A01201894/2011/H3N2--2011-07-05 | trig | pdm  | pdm  | H3       | pdm  | N2-2002   | pdm | pdm  |
| A/swine/Missouri/A01240016/2011/H3N2--2011-11-15  | trig | pdm  | pdm  | H3       | pdm  | N2-2002   | pdm | pdm  |
| A/swine/Missouri/A01240017/2011/H3N2--2011-11-15  | trig | pdm  | pdm  | H3       | pdm  | N2-2002   | pdm | pdm  |
| A/swine/Iowa/A01202576/2011/H1N2--2011-09-08      | trig | trig | pdm  | H1delta2 | pdm  | N2-2002   | pdm | pdm  |
| A/swine/Iowa/A01203125/2012/H1N2--2012-01-06      | trig | trig | pdm  | H1delta2 | pdm  | N2-2002   | pdm | pdm  |
| A/swine/Iowa/A01301778/2012/H1N2--2012-09-07      | trig | trig | pdm  | H1delta2 | pdm  | N2-2002   | pdm | pdm  |
| A/swine/Minnesota/A01202471/2011/H1N2--2011-07-28 | trig | trig | pdm  | H1delta2 | pdm  | N2-2002   | pdm | pdm  |
| A/swine/Wisconsin/A01203142/2012/H1N1--2012-01-11 | trig | trig | pdm  | H1gam1   | pdm  | classical | pdm | pdm  |
| A/swine/Illinois/A01202825/2011/H3N2--2011-11-09  | trig | trig | pdm  | H3       | pdm  | N2-1998   | pdm | pdm  |
| A/swine/Iowa/A01300445/2012/H3N2--2012-06-13      | trig | trig | pdm  | H3       | pdm  | N2-1998   | pdm | pdm  |
| A/swine/Minnesota/A00907733/2011/H3N2--2011-08-04 | trig | trig | pdm  | H3       | pdm  | N2-1998   | pdm | pdm  |
| A/swine/Minnesota/A00907734/2011/H3N2--2011-08-04 | trig | trig | pdm  | H3       | pdm  | N2-1998   | pdm | pdm  |
| A/swine/Minnesota/A01116381/2011/H3N2--2011-10-11 | trig | trig | pdm  | H3       | pdm  | N2-1998   | pdm | pdm  |
| A/swine/Minnesota/A01240127/2011/H3N2--2011-10-10 | trig | trig | pdm  | H3       | pdm  | N2-1998   | pdm | pdm  |
| A/swine/Minnesota/A01327763/2012/H3N2--2012-04-20 | trig | trig | pdm  | H3       | pdm  | N2-1998   | pdm | pdm  |
| A/swine/Minnesota/A01327764/2012/H3N2--2012-04-20 | trig | trig | pdm  | H3       | pdm  | N2-1998   | pdm | pdm  |
| A/swine/Nebraska/A01300023/2012/H3N2--2012-06-12  | trig | trig | pdm  | H3       | pdm  | N2-1998   | pdm | pdm  |
| A/swine/Nebraska/A01300032/2012/H3N2--2012-06-12  | trig | trig | pdm  | H3       | pdm  | N2-1998   | pdm | pdm  |

|                                                     |      |      |      |          |     |         |     |     |
|-----------------------------------------------------|------|------|------|----------|-----|---------|-----|-----|
| A/swine/North Carolina/226124/2010/H1N2--2010-09-08 | trig | trig | trig | H1delta1 | pdm | N2-1998 | pdm | pdm |
| A/swine/North Carolina/226125/2010/H1N2--2010-09-08 | trig | trig | trig | H1delta1 | pdm | N2-1998 | pdm | pdm |
| A/swine/North Carolina/226126/2010/H1N2--2010-09-08 | trig | trig | trig | H1delta1 | pdm | N2-1998 | pdm | pdm |
| A/swine/Illinois/A00857322/2012/H1N2--2012-06-12    | trig | trig | trig | H1delta2 | pdm | N2-2002 | pdm | pdm |
| A/swine/Illinois/A00857325/2012/H1N2--2012-06-14    | trig | trig | trig | H1delta2 | pdm | N2-2002 | pdm | pdm |
| A/swine/Illinois/A00857328/2012/H1N2--2012-06-14    | trig | trig | trig | H1delta2 | pdm | N2-2002 | pdm | pdm |
| A/swine/Illinois/A01215870/2013/H1N2--2013-05-28    | trig | trig | trig | H1delta2 | pdm | N2-2002 | pdm | pdm |
| A/swine/Iowa/13B092/2013/H1N2--2013-02-26           | trig | trig | trig | H1delta2 | pdm | N2-2002 | pdm | pdm |
| A/swine/Iowa/13B093/2013/H1N2--2013-02-26           | trig | trig | trig | H1delta2 | pdm | N2-2002 | pdm | pdm |
| A/swine/Illinois/A01201076/2011/H3N2--2011-04-07    | trig | trig | trig | H3       | pdm | N2-1998 | pdm | pdm |
| A/swine/Illinois/A01201077/2011/H3N2--2011-04-07    | trig | trig | trig | H3       | pdm | N2-1998 | pdm | pdm |
| A/swine/Iowa/A01049750/2011/H3N2--2011-03-28        | trig | trig | trig | H3       | pdm | N2-1998 | pdm | pdm |
| A/swine/Iowa/A01202657/2011/H3N2--2011-10-04        | trig | trig | trig | H3       | pdm | N2-1998 | pdm | pdm |
| A/swine/Iowa/A01203121/2012/H3N2--2012-01-05        | trig | trig | trig | H3       | pdm | N2-1998 | pdm | pdm |
| A/swine/Kansas/10-91088/2010/H3N2--2010-12-30       | trig | trig | trig | H3       | pdm | N2-1998 | pdm | pdm |
| A/swine/Kansas/11-101926/2011/H3N2--2011-01-19      | trig | trig | trig | H3       | pdm | N2-1998 | pdm | pdm |
| A/swine/Kansas/11-104465/2011/H3N2--2011-02-16      | trig | trig | trig | H3       | pdm | N2-1998 | pdm | pdm |
| A/swine/Kansas/11-104467/2011/H3N2--2011-02-16      | trig | trig | trig | H3       | pdm | N2-1998 | pdm | pdm |
| A/swine/Kansas/11-109700/2011/H3N2--2011-04-02      | trig | trig | trig | H3       | pdm | N2-1998 | pdm | pdm |
| A/swine/Kansas/11-110529/2011/H3N2--2011-04-08      | trig | trig | trig | H3       | pdm | N2-2002 | pdm | pdm |
| A/swine/Michigan/A01203498/2012/H3N2--2012-05-07    | trig | trig | trig | H3       | pdm | N2-2002 | pdm | pdm |
| A/swine/Minnesota/A01240557/2011/H3N2--2011-12-13   | trig | trig | trig | H3       | pdm | N2-1998 | pdm | pdm |
| A/swine/Missouri/A01241610/2012/H3N2--2012-02-14    | trig | trig | trig | H3       | pdm | N2-1998 | pdm | pdm |
| A/swine/Nebraska/A01104010/2011/H3N2--2011-12-05    | trig | trig | trig | H3       | pdm | N2-1998 | pdm | pdm |
| A/swine/Nebraska/A01241114/2012/H3N2--2012-01-10    | trig | trig | trig | H3       | pdm | N2-1998 | pdm | pdm |
| A/swine/Nebraska/A01241171/2012/H3N2--2012-01-16    | trig | trig | trig | H3       | pdm | N2-1998 | pdm | pdm |
| A/swine/Nebraska/A01241785/2012/H3N2--2012-02-20    | trig | trig | trig | H3       | pdm | N2-1998 | pdm | pdm |
| A/swine/Nebraska/A01327581/2012/H3N2--2012-04-16    | trig | trig | trig | H3       | pdm | N2-1998 | pdm | pdm |
| A/swine/Nebraska/A01327747/2012/H3N2--2012-04-26    | trig | trig | trig | H3       | pdm | N2-1998 | pdm | pdm |
| A/swine/Oklahoma/SG1498/2010/H3N2--2010-11-11       | trig | trig | trig | H3       | pdm | N2-1998 | pdm | pdm |
| A/swine/Texas/A01049555/2011/H3N2--2011-02-14       | trig | trig | trig | H3       | pdm | N2-1998 | pdm | pdm |

|                                                     |      |      |      |          |      |           |     |      |
|-----------------------------------------------------|------|------|------|----------|------|-----------|-----|------|
| A/swine/Texas/A01049556/2011/H3N2--2011-02-14       | trig | trig | trig | H3       | pdm  | N2-1998   | pdm | pdm  |
| A/swine/North Carolina/239108/2010/H1N2--2010-04-21 | trig | pdm  | pdm  | H1delta1 | trig | N2-1998   | pdm | trig |
| A/swine/North Carolina/SG1360/2010/H1N2--2010-04-21 | trig | pdm  | pdm  | H1delta1 | trig | N2-1998   | pdm | trig |
| A/swine/Iowa/A01202693/2011/H1N2--2011-10-10        | trig | pdm  | pdm  | H1delta2 | trig | N2-2002   | pdm | trig |
| A/swine/Iowa/13H072/2013/H1N2--2013-08-28           | trig | trig | pdm  | H1delta2 | pdm  | N2-2002   | pdm | trig |
| A/swine/Minnesota/12/2012/H1N2--2012-06-28          | trig | trig | pdm  | H1delta2 | pdm  | N2-2002   | pdm | trig |
| A/swine/Minnesota/A01328944/2012/H1N2--2012-06-06   | trig | trig | pdm  | H1delta2 | pdm  | N2-2002   | pdm | trig |
| A/swine/Minnesota/SG1402/2011/H1N2--2011-10-06      | trig | trig | pdm  | H1delta2 | pdm  | N2-2002   | pdm | trig |
| A/swine/Nebraska/A01104081/2014/H1N2--2014-05-12    | trig | trig | pdm  | H1delta2 | pdm  | N2-2002   | pdm | trig |
| A/swine/Iowa/13C094/2013/H1N2--2013-03-26           | trig | trig | pdm  | H1delta2 | trig | N2-2002   | pdm | trig |
| A/swine/Iowa/13C095/2013/H1N2--2013-03-26           | trig | trig | pdm  | H1delta2 | trig | N2-2002   | pdm | trig |
| A/swine/Iowa/13C096/2013/H1N2--2013-03-26           | trig | trig | pdm  | H1delta2 | trig | N2-2002   | pdm | trig |
| A/swine/Iowa/13C097/2013/H1N2--2013-03-26           | trig | trig | pdm  | H1delta2 | trig | N2-2002   | pdm | trig |
| A/swine/Iowa/13C098/2013/H1N2--2013-03-26           | trig | trig | pdm  | H1delta2 | trig | N2-2002   | pdm | trig |
| A/swine/Iowa/13C099/2013/H1N2--2013-03-26           | trig | trig | pdm  | H1delta2 | trig | N2-2002   | pdm | trig |
| A/swine/Iowa/13C100/2013/H1N2--2013-03-26           | trig | trig | pdm  | H1delta2 | trig | N2-2002   | pdm | trig |
| A/swine/California/A00968789/2013/H1N1--2013-01-15  | trig | trig | pdm  | H1gam1   | pdm  | classical | pdm | trig |
| A/swine/Illinois/A01158960/2013/H1N1--2013-02-08    | trig | trig | pdm  | H1gam1   | pdm  | classical | pdm | trig |
| A/swine/Illinois/A01427335/2013/H1N1--2013-12-23    | trig | trig | pdm  | H1gam1   | pdm  | classical | pdm | trig |
| A/swine/Iowa/13E078/2013/H1N1--2013-05-29           | trig | trig | pdm  | H1gam1   | pdm  | classical | pdm | trig |
| A/swine/Iowa/13E088/2013/H1N1--2013-05-29           | trig | trig | pdm  | H1gam1   | pdm  | classical | pdm | trig |
| A/swine/Iowa/13E100/2013/H1N1--2013-05-29           | trig | trig | pdm  | H1gam1   | pdm  | classical | pdm | trig |
| A/swine/Iowa/A01267837/2012/H1N1--2012-10-17        | trig | trig | pdm  | H1gam1   | pdm  | classical | pdm | trig |
| A/swine/Iowa/A01328941/2012/H1N1--2012-05-15        | trig | trig | pdm  | H1gam1   | pdm  | classical | pdm | trig |
| A/swine/Minnesota/A01202597/2011/H1N1--2011-09-16   | trig | trig | pdm  | H1gam1   | pdm  | classical | pdm | trig |
| A/swine/Minnesota/A01203313/2012/H1N1--2012-03-01   | trig | trig | pdm  | H1gam1   | pdm  | classical | pdm | trig |
| A/swine/Minnesota/A01267908/2012/H1N1--2012-10-23   | trig | trig | pdm  | H1gam1   | pdm  | classical | pdm | trig |
| A/swine/Minnesota/A01270355/2012/H1N1--2012-09-26   | trig | trig | pdm  | H1gam1   | pdm  | classical | pdm | trig |
| A/swine/Illinois/A01227426/2013/H1N1--2013-09-06    | trig | trig | pdm  | H1gam1   | trig | classical | pdm | trig |
| A/swine/Michigan/A01259075/2013/H1N1--2013-09-11    | trig | trig | pdm  | H1gam1   | trig | classical | pdm | trig |
| A/swine/Illinois/A01327396/2012/H3N2--2012-04-05    | trig | trig | pdm  | H3       | pdm  | N2-2002   | pdm | trig |



|                                                     |      |      |      |          |      |           |     |      |
|-----------------------------------------------------|------|------|------|----------|------|-----------|-----|------|
| A/swine/Illinois/A01327868/2012/H3N2--2012-05-03    | trig | trig | pdm  | H3       | pdm  | N2-2002   | pdm | trig |
| A/swine/Illinois/A01427144/2013/H3N2--2013-11-06    | trig | trig | pdm  | H3       | pdm  | N2-2002   | pdm | trig |
| A/swine/Iowa/13H065/2013/H3N2--2013-08-28           | trig | trig | pdm  | H3       | pdm  | N2-2002   | pdm | trig |
| A/swine/Iowa/13H073/2013/H3N2--2013-08-28           | trig | trig | pdm  | H3       | pdm  | N2-2002   | pdm | trig |
| A/swine/Iowa/13H076/2013/H3N2--2013-08-28           | trig | trig | pdm  | H3       | pdm  | N2-2002   | pdm | trig |
| A/swine/Iowa/13H092/2013/H3N2--2013-08-28           | trig | trig | pdm  | H3       | pdm  | N2-2002   | pdm | trig |
| A/swine/Iowa/A01203943/2012/H3N2--2012-10-03        | trig | trig | pdm  | H3       | pdm  | N2-2002   | pdm | trig |
| A/swine/Minnesota/239105/2009/H3N2--2009-11-24      | trig | trig | pdm  | H3       | pdm  | N2-2002   | pdm | trig |
| A/swine/Minnesota/4/2012/H3N2--2012-06-06           | trig | trig | pdm  | H3       | pdm  | N2-2002   | pdm | trig |
| A/swine/Minnesota/A01271731/2012/H3N2--2012-10-31   | trig | trig | pdm  | H3       | pdm  | N2-2002   | pdm | trig |
| A/swine/Illinois/A01116190/2011/H3N2--2011-08-25    | trig | trig | pdm  | H3       | trig | N2-2002   | pdm | trig |
| A/swine/Indiana/A00968359/2012/H3N2--2012-03-06     | trig | trig | pdm  | H3       | trig | N2-2002   | pdm | trig |
| A/swine/Iowa/13C019/2013/H3N2--2013-03-26           | trig | trig | pdm  | H3       | trig | N2-2002   | pdm | trig |
| A/swine/Iowa/13C020/2013/H3N2--2013-03-26           | trig | trig | pdm  | H3       | trig | N2-2002   | pdm | trig |
| A/swine/Iowa/13C029/2013/H3N2--2013-03-26           | trig | trig | pdm  | H3       | trig | N2-2002   | pdm | trig |
| A/swine/Iowa/13C038/2013/H3N2--2013-03-26           | trig | trig | pdm  | H3       | trig | N2-2002   | pdm | trig |
| A/swine/Iowa/13C044/2013/H3N2--2013-03-26           | trig | trig | pdm  | H3       | trig | N2-2002   | pdm | trig |
| A/swine/Iowa/13C075/2013/H3N2--2013-03-26           | trig | trig | pdm  | H3       | trig | N2-2002   | pdm | trig |
| A/swine/Iowa/A01202889/2011/H3N2--2011-11-18        | trig | trig | pdm  | H3       | trig | N2-2002   | pdm | trig |
| A/swine/Michigan/A01259074/2013/H3N2--2013-08-20    | trig | trig | pdm  | H3       | trig | N2-2002   | pdm | trig |
| A/swine/Minnesota/A01201424/2010/H3N2--2010-11-09   | trig | trig | pdm  | H3       | trig | N2-2002   | pdm | trig |
| A/swine/Nebraska/A01399268/2013/H3N2--2013-08-09    | trig | trig | pdm  | H3       | trig | N2-1998   | pdm | trig |
| A/swine/Mississippi/A01202593/2011/H1N1--2011-09-13 | trig | trig | trig | H1beta   | trig | classical | pdm | trig |
| A/swine/Arkansas/SG1375/2011/H1N2--2011-08-17       | trig | trig | trig | H1delta2 | pdm  | N2-2002   | pdm | trig |
| A/swine/Arkansas/SG1376/2011/H1N2--2011-01-26       | trig | trig | trig | H1delta2 | pdm  | N2-2002   | pdm | trig |
| A/swine/Arkansas/SG1377/2011/H1N2--2011-04-29       | trig | trig | trig | H1delta2 | pdm  | N2-2002   | pdm | trig |
| A/swine/Arkansas/SG1378/2011/H1N2--2011-06-16       | trig | trig | trig | H1delta2 | pdm  | N2-2002   | pdm | trig |
| A/swine/Arkansas/SG1382/2011/H1N2--2011-06-14       | trig | trig | trig | H1delta2 | pdm  | N2-2002   | pdm | trig |
| A/swine/Arkansas/SG1383/2011/H1N2--2011-09-01       | trig | trig | trig | H1delta2 | pdm  | N2-2002   | pdm | trig |
| A/swine/Arkansas/SG1384/2011/H1N2--2011-07-13       | trig | trig | trig | H1delta2 | pdm  | N2-2002   | pdm | trig |
| A/swine/Illinois/A00843191/2013/H1N2--2013-09-19    | trig | trig | trig | H1delta2 | pdm  | N2-2002   | pdm | trig |

|                                                     |      |      |      |          |      |           |     |      |
|-----------------------------------------------------|------|------|------|----------|------|-----------|-----|------|
| A/swine/Illinois/A01047363/2011/H1N2--2011-01-18    | trig | trig | trig | H1delta2 | pdm  | N2-2002   | pdm | trig |
| A/swine/Illinois/A01047363/2011/H1N2--2011-01-18    | trig | trig | trig | H1delta2 | pdm  | N2-2002   | pdm | trig |
| A/swine/Illinois/A01125988/2012/H1N2--2012-03-04    | trig | trig | trig | H1delta2 | pdm  | N2-2002   | pdm | trig |
| A/swine/Illinois/A01134580/2011/H1N2--2011-02-23    | trig | trig | trig | H1delta2 | pdm  | N2-2002   | pdm | trig |
| A/swine/Illinois/A01134580/2011/H1N2--2011-02-23    | trig | trig | trig | H1delta2 | pdm  | N2-2002   | pdm | trig |
| A/swine/Illinois/A01158947/2012/H1N2--2012-12-28    | trig | trig | trig | H1delta2 | pdm  | N2-2002   | pdm | trig |
| A/swine/Illinois/A01243094/2012/H1N2--2012-01-30    | trig | trig | trig | H1delta2 | pdm  | N2-2002   | pdm | trig |
| A/swine/Illinois/A01328594/2012/H1N2--2012-05-22    | trig | trig | trig | H1delta2 | pdm  | N2-2002   | pdm | trig |
| A/swine/Indiana/04254/2011/H1N2--2011-03-31         | trig | trig | trig | H1delta2 | pdm  | N2-2002   | pdm | trig |
| A/swine/Indiana/A00968332/2011/H1N2--2011-04-07     | trig | trig | trig | H1delta2 | pdm  | N2-2002   | pdm | trig |
| A/swine/Indiana/A00968358/2012/H1N2--2012-02-08     | trig | trig | trig | H1delta2 | pdm  | N2-2002   | pdm | trig |
| A/swine/Indiana/A00968366/2012/H1N2--2012-07-12     | trig | trig | trig | H1delta2 | pdm  | N2-2002   | pdm | trig |
| A/swine/Indiana/A01049953/2011/H1N2--2011-05-07     | trig | trig | trig | H1delta2 | pdm  | N2-2002   | pdm | trig |
| A/swine/Indiana/A01049953/2011/H1N2--2011-05-07     | trig | trig | trig | H1delta2 | pdm  | N2-2002   | pdm | trig |
| A/swine/Minnesota/A01279807/2012/H1N2--2012-12-10   | trig | trig | trig | H1delta2 | pdm  | N2-2002   | pdm | trig |
| A/swine/Minnesota/A01349281/2013/H1N2--2013-03-08   | trig | trig | trig | H1delta2 | pdm  | N2-2002   | pdm | trig |
| A/swine/Nebraska/A01202501/2011/H1N2--2011-08-10    | trig | trig | trig | H1delta2 | pdm  | N2-2002   | pdm | trig |
| A/swine/North Carolina/SG1391/2011/H1N2--2011-03-30 | trig | trig | trig | H1delta2 | pdm  | N2-2002   | pdm | trig |
| A/swine/Indiana/A01049964/2011/H1N2--2011-05-11     | trig | trig | trig | H1delta2 | trig | N2-2002   | pdm | trig |
| A/swine/Indiana/A01202631/2011/H1N2--2011-10-01     | trig | trig | trig | H1delta2 | trig | N2-2002   | pdm | trig |
| A/swine/Iowa/A01049970/2011/H1N2--2011-05-16        | trig | trig | trig | H1delta2 | trig | N2-2002   | pdm | trig |
| A/swine/Iowa/A01202795/2011/H1N2--2011-11-02        | trig | trig | trig | H1delta2 | trig | N2-2002   | pdm | trig |
| A/swine/Iowa/A01202795/2011/H1N2--2011-11-02        | trig | trig | trig | H1delta2 | trig | N2-2002   | pdm | trig |
| A/swine/Kansas/12-156064/2012/H1N2--2012-12-        | trig | trig | trig | H1delta2 | trig | N2-2002   | pdm | trig |
| A/swine/Minnesota/22/2012/H1N2--2012-09-21          | trig | trig | trig | H1delta2 | trig | N2-2002   | pdm | trig |
| A/swine/Minnesota/3128/2010/H1N2--2010-09-24        | trig | trig | trig | H1delta2 | trig | N2-2002   | pdm | trig |
| A/swine/Minnesota/A01301731/2012/H1N2--2012-08-28   | trig | trig | trig | H1delta2 | trig | N2-2002   | pdm | trig |
| A/swine/Nebraska/A01104068/2013/H1N2--2013-10-28    | trig | trig | trig | H1delta2 | trig | N2-2002   | pdm | trig |
| A/swine/Nebraska/A01104071/2013/H1N2--2013-10-31    | trig | trig | trig | H1delta2 | trig | N2-2002   | pdm | trig |
| A/swine/Illinois/A01047982/2011/H1N1--2011-01-17    | trig | trig | trig | H1gam1   | pdm  | classical | pdm | trig |
| A/swine/Illinois/A01047982/2011/H1N1--2011-01-17    | trig | trig | trig | H1gam1   | pdm  | classical | pdm | trig |

|                                                        |      |      |      |        |      |           |     |      |
|--------------------------------------------------------|------|------|------|--------|------|-----------|-----|------|
| A/swine/Illinois/A01047984/2011/H1N1--2011-01-17       | trig | trig | trig | H1gam1 | pdm  | classical | pdm | trig |
| A/swine/Illinois/A01047984/2011/H1N1--2011-01-17       | trig | trig | trig | H1gam1 | pdm  | classical | pdm | trig |
| A/swine/Illinois/A01203226/2012/H1N1--2012-02-01       | trig | trig | trig | H1gam1 | pdm  | classical | pdm | trig |
| A/swine/Illinois/A01427261/2013/H1N1--2013-12-12       | trig | trig | trig | H1gam1 | pdm  | classical | pdm | trig |
| A/swine/Illinois/A01427305/2013/H1N1--2013-12-23       | trig | trig | trig | H1gam1 | pdm  | classical | pdm | trig |
| A/swine/Illinois/A01427360/2013/H1N1--2013-12-30       | trig | trig | trig | H1gam1 | pdm  | classical | pdm | trig |
| A/swine/Iowa/SG1401/2011/H1N1--2011-10-05              | trig | trig | trig | H1gam1 | pdm  | classical | pdm | trig |
| A/swine/North Carolina/A01290378/2013/H1N1--2013-08-20 | trig | trig | trig | H1gam1 | pdm  | classical | pdm | trig |
| A/swine/North Carolina/A01364596/2013/H1N1--2013-09-03 | trig | trig | trig | H1gam1 | pdm  | classical | pdm | trig |
| A/swine/Illinois/A01158994/2013/H1N1--2013-05-03       | trig | trig | trig | H1gam1 | trig | classical | pdm | trig |
| A/swine/Illinois/A01328742/2012/H1N1--2012-05-24       | trig | trig | trig | H1gam1 | trig | classical | pdm | trig |
| A/swine/Indiana/A00968365/2012/H1N1--2012-07-07        | trig | trig | trig | H1gam1 | trig | classical | pdm | trig |
| A/swine/Indiana/A01243254/2012/H1N1--2012-03-14        | trig | trig | trig | H1gam1 | trig | classical | pdm | trig |
| A/swine/Indiana/A01260029/2012/H1N1--2012-09-26        | trig | trig | trig | H1gam1 | trig | classical | pdm | trig |
| A/swine/Indiana/A01260109/2012/H1N1--2012-11-08        | trig | trig | trig | H1gam1 | trig | classical | pdm | trig |
| A/swine/Indiana/A01260209/2013/H1N1--2013-01-18        | trig | trig | trig | H1gam1 | trig | classical | pdm | trig |
| A/swine/Iowa/A01203117/2012/H1N1--2012-01-05           | trig | trig | trig | H1gam1 | trig | classical | pdm | trig |
| A/swine/Michigan/A01203374/2012/H1N1--2012-04-02       | trig | trig | trig | H1gam1 | trig | classical | pdm | trig |
| A/swine/Minnesota/A01134336/2010/H1N1--2010-11-15      | trig | trig | trig | H1gam1 | trig | classical | pdm | trig |
| A/swine/Minnesota/A01241397/2012/H1N1--2012-02-02      | trig | trig | trig | H1gam1 | trig | classical | pdm | trig |
| A/swine/Ohio/25/2012/H1N1--2012-09-28                  | trig | trig | trig | H1gam1 | trig | classical | pdm | trig |
| A/swine/Illinois/A00857318a/2012/H3N2--2012-02-23      | trig | trig | trig | H3     | pdm  | N2-2002   | pdm | trig |
| A/swine/Illinois/A01241065/2012/H3N2--2012-01-16       | trig | trig | trig | H3     | pdm  | N2-1998   | pdm | trig |
| A/swine/Illinois/A01241066/2012/H3N2--2012-01-16       | trig | trig | trig | H3     | pdm  | N2-1998   | pdm | trig |
| A/swine/Illinois/A01241208/2012/H3N2--2012-01-24       | trig | trig | trig | H3     | pdm  | N2-1998   | pdm | trig |
| A/swine/Illinois/A01241212/2012/H3N2--2012-01-24       | trig | trig | trig | H3     | pdm  | N2-1998   | pdm | trig |
| A/swine/Indiana/A01203372/2012/H3N2--2012-04-03        | trig | trig | trig | H3     | pdm  | N2-2002   | pdm | trig |
| A/swine/Indiana/A01260254/2013/H3N2--2013-03-20        | trig | trig | trig | H3     | pdm  | N2-2002   | pdm | trig |
| A/swine/Minnesota/A01047396/2011/H3N2--2011-01-13      | trig | trig | trig | H3     | pdm  | N2-2002   | pdm | trig |
| A/swine/Minnesota/A01125995/2012/H3N2--2012-03-08      | trig | trig | trig | H3     | pdm  | N2-1998   | pdm | trig |
| A/swine/NorthDakota/A01104084/2014/H3N2--2014-07-25    | trig | trig | trig | H3     | pdm  | N2-2002   | pdm | trig |

|                                                   |      |      |      |    |      |         |     |      |
|---------------------------------------------------|------|------|------|----|------|---------|-----|------|
| A/swine/Texas/A01049914/2011/H3N2--2011-04-28     | trig | trig | trig | H3 | pdm  | N2-1998 | pdm | trig |
| A/swine/Texas/A01049915/2011/H3N2--2011-04-28     | trig | trig | trig | H3 | pdm  | N2-1998 | pdm | trig |
| A/swine/Illinois/A00843193/2014/H3N2--2014-01-03  | trig | trig | trig | H3 | trig | N2-2002 | pdm | trig |
| A/swine/Illinois/A00857304a/2012/H3N2--2012-01-05 | trig | trig | trig | H3 | trig | N2-2002 | pdm | trig |
| A/swine/Illinois/A00857304b/2012/H3N2--2012-01-05 | trig | trig | trig | H3 | trig | N2-2002 | pdm | trig |
| A/swine/Illinois/A01202978/2011/H3N2--2011-12-16  | trig | trig | trig | H3 | trig | N2-2002 | pdm | trig |
| A/swine/Illinois/A01240835/2012/H3N2--2012-01-03  | trig | trig | trig | H3 | trig | N2-2002 | pdm | trig |
| A/swine/Illinois/A01240836/2012/H3N2--2012-01-03  | trig | trig | trig | H3 | trig | N2-2002 | pdm | trig |
| A/swine/Illinois/A01241469/2012/H3N2--2012-02-08  | trig | trig | trig | H3 | trig | N2-2002 | pdm | trig |
| A/swine/Illinois/A01241842/2012/H3N2--2012-02-27  | trig | trig | trig | H3 | trig | N2-2002 | pdm | trig |
| A/swine/Illinois/A01241871/2012/H3N2--2012-02-29  | trig | trig | trig | H3 | trig | N2-2002 | pdm | trig |
| A/swine/Illinois/A01241916/2012/H3N2--2012-03-01  | trig | trig | trig | H3 | trig | N2-2002 | pdm | trig |
| A/swine/Illinois/A01327903/2012/H3N2--2012-05-08  | trig | trig | trig | H3 | trig | N2-2002 | pdm | trig |
| A/swine/Illinois/A01327905/2012/H3N2--2012-05-08  | trig | trig | trig | H3 | trig | N2-2002 | pdm | trig |
| A/swine/Illinois/A01427136/2013/H3N2--2013-11-04  | trig | trig | trig | H3 | trig | N2-2002 | pdm | trig |
| A/swine/Indiana/A00968344/2011/H3N2--2011-09-08   | trig | trig | trig | H3 | trig | N2-2002 | pdm | trig |
| A/swine/Indiana/A00968364/2012/H3N2--2012-07-03   | trig | trig | trig | H3 | trig | N2-2002 | pdm | trig |
| A/swine/Indiana/A00968373/2012/H3N2--2012-07-13   | trig | trig | trig | H3 | trig | N2-2002 | pdm | trig |
| A/swine/Indiana/A00968376/2012/H3N2--2012-07-13   | trig | trig | trig | H3 | trig | N2-2002 | pdm | trig |
| A/swine/Indiana/A00968379/2012/H3N2--2012-07-13   | trig | trig | trig | H3 | trig | N2-2002 | pdm | trig |
| A/swine/Indiana/A00968380/2012/H3N2--2012-07-18   | trig | trig | trig | H3 | trig | N2-2002 | pdm | trig |
| A/swine/Indiana/A00968386/2012/H3N2--2012-07-26   | trig | trig | trig | H3 | trig | N2-2002 | pdm | trig |
| A/swine/Indiana/A00968394/2012/H3N2--2012-08-06   | trig | trig | trig | H3 | trig | N2-2002 | pdm | trig |
| A/swine/Indiana/A00968398/2012/H3N2--2012-08-06   | trig | trig | trig | H3 | trig | N2-2002 | pdm | trig |
| A/swine/Indiana/A01104030/2012/H3N2--2012-08-01   | trig | trig | trig | H3 | trig | N2-2002 | pdm | trig |
| A/swine/Indiana/A01202621/2011/H3N2--2011-09-28   | trig | trig | trig | H3 | trig | N2-2002 | pdm | trig |
| A/swine/Indiana/A01203521/2012/H3N2--2012-05-15   | trig | trig | trig | H3 | trig | N2-2002 | pdm | trig |
| A/swine/Indiana/A01260041/2012/H3N2--2012-10-     | trig | trig | trig | H3 | trig | N2-2002 | pdm | trig |
| A/swine/Indiana/A01260313/2013/H3N2--2013-06-21   | trig | trig | trig | H3 | trig | N2-2002 | pdm | trig |
| A/swine/Indiana/A01327213/2012/H3N2--2012-02-06   | trig | trig | trig | H3 | trig | N2-2002 | pdm | trig |
| A/swine/Indiana/A01327215/2012/H3N2--2012-02-06   | trig | trig | trig | H3 | trig | N2-2002 | pdm | trig |

|                                                        |      |      |      |    |      |         |     |      |
|--------------------------------------------------------|------|------|------|----|------|---------|-----|------|
| A/swine/lowa/13C040/2013/H3N2--2013-03-26              | trig | trig | trig | H3 | trig | N2-2002 | pdm | trig |
| A/swine/lowa/13E045/2013/H3N2--2013-05-29              | trig | trig | trig | H3 | trig | N2-2002 | pdm | trig |
| A/swine/lowa/13H068/2013/H3N2--2013-08-28              | trig | trig | trig | H3 | trig | N2-2002 | pdm | trig |
| A/swine/lowa/13H069/2013/H3N2--2013-08-28              | trig | trig | trig | H3 | trig | N2-2002 | pdm | trig |
| A/swine/lowa/13H075/2013/H3N2--2013-08-28              | trig | trig | trig | H3 | trig | N2-2002 | pdm | trig |
| A/swine/lowa/13H081/2013/H3N2--2013-08-28              | trig | trig | trig | H3 | trig | N2-2002 | pdm | trig |
| A/swine/lowa/13H082/2013/H3N2--2013-08-28              | trig | trig | trig | H3 | trig | N2-2002 | pdm | trig |
| A/swine/lowa/13H087/2013/H3N2--2013-08-28              | trig | trig | trig | H3 | trig | N2-2002 | pdm | trig |
| A/swine/lowa/13H094/2013/H3N2--2013-08-28              | trig | trig | trig | H3 | trig | N2-2002 | pdm | trig |
| A/swine/lowa/321160/2012/H3N2--2012-08-23              | trig | trig | trig | H3 | trig | N2-2002 | pdm | trig |
| A/swine/lowa/A01049034/2010/H3N2--2010-11-16           | trig | trig | trig | H3 | trig | N2-2002 | pdm | trig |
| A/swine/lowa/A01049035/2010/H3N2--2010-11-16           | trig | trig | trig | H3 | trig | N2-2002 | pdm | trig |
| A/swine/lowa/A01049036/2010/H3N2--2010-11-16           | trig | trig | trig | H3 | trig | N2-2002 | pdm | trig |
| A/swine/lowa/A01202529/2011/H3N2--2011-08-22           | trig | trig | trig | H3 | trig | N2-2002 | pdm | trig |
| A/swine/lowa/A01202530/2011/H3N2--2011-08-22           | trig | trig | trig | H3 | trig | N2-2002 | pdm | trig |
| A/swine/lowa/A01202573/2011/H3N2--2011-09-07           | trig | trig | trig | H3 | trig | N2-2002 | pdm | trig |
| A/swine/lowa/A01202639/2011/H3N2--2011-09-30           | trig | trig | trig | H3 | trig | N2-2002 | pdm | trig |
| A/swine/lowa/A01202640/2011/H3N2--2011-09-30           | trig | trig | trig | H3 | trig | N2-2002 | pdm | trig |
| A/swine/lowa/A01202878/2011/H3N2--2011-11-17           | trig | trig | trig | H3 | trig | N2-2002 | pdm | trig |
| A/swine/lowa/A01202879/2011/H3N2--2011-11-17           | trig | trig | trig | H3 | trig | N2-2002 | pdm | trig |
| A/swine/lowa/A01267939/2012/H3N2--2012-10-24           | trig | trig | trig | H3 | trig | N2-2002 | pdm | trig |
| A/swine/Maryland/A01104040/2012/H3N2--2012-08-15       | trig | trig | trig | H3 | trig | N2-2002 | pdm | trig |
| A/swine/Maryland/A01104048/2012/H3N2--2012-08-16       | trig | trig | trig | H3 | trig | N2-2002 | pdm | trig |
| A/swine/Maryland/A01319694/2013/H3N2--2013-04-10       | trig | trig | trig | H3 | trig | N2-2002 | pdm | trig |
| A/swine/Maryland/A01444460/2013/H3N2--2013-01-03       | trig | trig | trig | H3 | trig | N2-2002 | pdm | trig |
| A/swine/Michigan/A01259003/2012/H3N2--2012-11-28       | trig | trig | trig | H3 | trig | N2-2002 | pdm | trig |
| A/swine/Minnesota/A01301908/2012/H3N2--2012-09-02      | trig | trig | trig | H3 | trig | N2-2002 | pdm | trig |
| A/swine/Montana/21/2012/H3N2--2012-09-14               | trig | trig | trig | H3 | trig | N2-1998 | pdm | trig |
| A/swine/North Carolina/A01203272/2012/H3N2--2012-02-13 | trig | trig | trig | H3 | trig | N2-2002 | pdm | trig |
| A/swine/North Carolina/A01270394/2012/H3N2--2012-05-31 | trig | trig | trig | H3 | trig | N2-2002 | pdm | trig |
| A/swine/NY/A01104005/2011/H3N2--2011-09-13             | trig | trig | trig | H3 | trig | N2-2002 | pdm | trig |

|                                                        |      |      |      |          |      |           |      |      |
|--------------------------------------------------------|------|------|------|----------|------|-----------|------|------|
| A/swine/Ohio/1/2012/H3N2--2012-06-                     | trig | trig | trig | H3       | trig | N2-2002   | pdm  | trig |
| A/swine/Ohio/6/2012/H3N2--2012-06-                     | trig | trig | trig | H3       | trig | N2-2002   | pdm  | trig |
| A/swine/Ohio/7/2012/H3N2--2012-06-                     | trig | trig | trig | H3       | trig | N2-2002   | pdm  | trig |
| A/swine/Ohio/A00138552/2012/H3N2--2012-09-02           | trig | trig | trig | H3       | trig | N2-2002   | pdm  | trig |
| A/swine/Ohio/A00152576/2012/H3N2--2012-08-15           | trig | trig | trig | H3       | trig | N2-2002   | pdm  | trig |
| A/swine/Ohio/A01133464/2012/H3N2--2012-08-03           | trig | trig | trig | H3       | trig | N2-2002   | pdm  | trig |
| A/swine/Ohio/A01133466/2012/H3N2--2012-08-06           | trig | trig | trig | H3       | trig | N2-2002   | pdm  | trig |
| A/swine/Ohio/A01203186/2012/H3N2--2012-01-24           | trig | trig | trig | H3       | trig | N2-2002   | pdm  | trig |
| A/swine/Ohio/A01208457/2012/H3N2--2012-08-07           | trig | trig | trig | H3       | trig | N2-2002   | pdm  | trig |
| A/swine/Ohio/A01349305/2013/H3N2--2013-03-12           | trig | trig | trig | H3       | trig | N2-2002   | pdm  | trig |
| A/swine/Pennsylvania/A01104049/2012/H3N2--2012-08-09   | trig | trig | trig | H3       | trig | N2-2002   | pdm  | trig |
| A/swine/Pennsylvania/A01104050/2012/H3N2--2012-08-09   | trig | trig | trig | H3       | trig | N2-2002   | pdm  | trig |
| A/swine/Pennsylvania/A01380412/2013/H3N2--2013-03-26   | trig | trig | trig | H3       | trig | N2-2002   | pdm  | trig |
| A/swine/Tennessee/A01104055/2012/H3N2--2012-10-25      | trig | trig | trig | H3       | trig | N2-2002   | pdm  | trig |
| A/swine/Texas/A01104013/2012/H3N2--2012-02-15          | trig | trig | trig | H3       | trig | N2-2002   | pdm  | trig |
| A/swine/Wisconsin/A00677500/2012/H3N2--2012-08-19      | trig | trig | trig | H3       | trig | N2-2002   | pdm  | trig |
| A/swine/Wyoming/A01379327/2013/H3N2--2013-03-29        | trig | trig | trig | H3       | trig | N2-2002   | pdm  | trig |
| A/swine/Wyoming/A01444560/2013/H3N2--2013-01-13        | trig | trig | trig | H3       | trig | N2-2002   | pdm  | trig |
| A/swine/Oklahoma/A01202498/2011/H1N2--2011-08-08       | trig | trig | pdm  | H1delta2 | trig | N2-2002   | trig | trig |
| A/swine/Texas/SG1380/2011/H1N1--2011-10-06             | trig | trig | trig | H1beta   | pdm  | classical | trig | trig |
| A/swine/Colorado/SG1322/2009/H1N1--2009-08-26          | trig | trig | trig | H1beta   | trig | classical | trig | trig |
| A/swine/Illinois/02626/2009/H1N1--2009-01-29           | trig | trig | trig | H1beta   | trig | classical | trig | trig |
| A/swine/Minnesota/02817/2009/H1N1--2009-05-08          | trig | trig | trig | H1beta   | trig | classical | trig | trig |
| A/swine/MN/23506/2009/H1N1--2009-05-07                 | trig | trig | trig | H1beta   | trig | classical | trig | trig |
| A/swine/Nebraska/A01240348/2011/H1N1--2011-11-16       | trig | trig | trig | H1beta   | trig | classical | trig | trig |
| A/swine/Nebraska/A01399642/2013/H1N1--2013-09-10       | trig | trig | trig | H1beta   | trig | classical | trig | trig |
| A/swine/Oklahoma/SG1251/2010/H1N1--2010-09-24          | trig | trig | trig | H1beta   | trig | classical | trig | trig |
| A/swine/Oklahoma/SG1325/2009/H1N1--2009-02-04          | trig | trig | trig | H1beta   | trig | classical | trig | trig |
| A/swine/Oklahoma/SG1349/2010/H1N1--2010-09-24          | trig | trig | trig | H1beta   | trig | classical | trig | trig |
| A/swine/Oklahoma/SG1500/2010/H1N1--2010-10-19          | trig | trig | trig | H1beta   | trig | classical | trig | trig |
| A/swine/North Carolina/A01048807/2011/H1N2--2011-11-15 | trig | trig | trig | H1delta1 | pdm  | N2-1998   | trig | trig |

|                                                        |      |      |      |          |      |         |      |      |
|--------------------------------------------------------|------|------|------|----------|------|---------|------|------|
| A/swine/Arkansas/02927/2009/H1N2--2009-12-02           | trig | trig | trig | H1delta1 | trig | N2-2002 | trig | trig |
| A/swine/Kentucky/02564/2009/H1N2--2009-01-30           | trig | trig | trig | H1delta1 | trig | N2-2002 | trig | trig |
| A/swine/Kentucky/02573/2009/H1N2--2009-02-10           | trig | trig | trig | H1delta1 | trig | N2-2002 | trig | trig |
| A/swine/Michigan/A01259001/2012/H1N2--2012-09-27       | trig | trig | trig | H1delta1 | trig | N2-1998 | trig | trig |
| A/swine/Missouri/SG1343/2009/H1N2--2009-09-16          | trig | trig | trig | H1delta1 | trig | N2-2002 | trig | trig |
| A/swine/North Carolina/A01270393/2011/H1N2--2011-12-08 | trig | trig | trig | H1delta1 | trig | N2-1998 | trig | trig |
| A/swine/North Carolina/SG1335/2009/H1N2--2009-01-20    | trig | trig | trig | H1delta1 | trig | N2-2002 | trig | trig |
| A/swine/North Carolina/SG1359/2010/H1N2--2010-02-19    | trig | trig | trig | H1delta1 | trig | N2-1998 | trig | trig |
| A/swine/North Carolina/SG1365/2010/H1N2--2010-10-29    | trig | trig | trig | H1delta1 | trig | N2-1998 | trig | trig |
| A/swine/North Carolina/SG1388/2011/H1N2--2011-03-25    | trig | trig | trig | H1delta1 | trig | N2-1998 | trig | trig |
| A/swine/North Carolina/SG1389/2011/H1N2--2011-03-18    | trig | trig | trig | H1delta1 | trig | N2-1998 | trig | trig |
| A/swine/North Carolina/SG1394/2011/H1N2--2011-09-28    | trig | trig | trig | H1delta1 | trig | N2-1998 | trig | trig |
| A/swine/Virginia/SG1386/2011/H1N2--2011-11-04          | trig | trig | trig | H1delta1 | trig | N2-1998 | trig | trig |
| A/swine/Illinois/A01049952/2011/H1N2--2011-05-09       | trig | trig | trig | H1delta2 | trig | N2-2002 | trig | trig |
| A/swine/Illinois/A01049952/2011/H1N2--2011-05-09       | trig | trig | trig | H1delta2 | trig | N2-2002 | trig | trig |
| A/swine/Illinois/A01049968/2011/H1N2--2011-05-11       | trig | trig | trig | H1delta2 | trig | N2-2002 | trig | trig |
| A/swine/Illinois/A01301796/2012/H1N2--2012-09-10       | trig | trig | trig | H1delta2 | trig | N2-2002 | trig | trig |
| A/swine/Iowa/19/2012/H1N2--2012-09-10                  | trig | trig | trig | H1delta2 | trig | N2-2002 | trig | trig |
| A/swine/Iowa/A01328942/2012/H1N2--2012-05-18           | trig | trig | trig | H1delta2 | trig | N2-2002 | trig | trig |
| A/swine/Kansas/11-104259/2011/H1N2--2011-12-           | trig | trig | trig | H1delta2 | trig | N2-2002 | trig | trig |
| A/swine/Minnesota/02852/2009/H1N2--2009-06-05          | trig | trig | trig | H1delta2 | trig | N2-2002 | trig | trig |
| A/swine/Minnesota/0745/2010/H1N2--2010-03-03           | trig | trig | trig | H1delta2 | trig | N2-2002 | trig | trig |
| A/swine/Minnesota/A01134341/2010/H1N2--2010-05-04      | trig | trig | trig | H1delta2 | trig | N2-2002 | trig | trig |
| A/swine/Minnesota/A01134353/2011/H1N2--2011-02-07      | trig | trig | trig | H1delta2 | trig | N2-2002 | trig | trig |
| A/swine/Minnesota/A01134353/2011/H1N2--2011-02-07      | trig | trig | trig | H1delta2 | trig | N2-2002 | trig | trig |
| A/swine/Minnesota/SG1370/2010/H1N2--2010-11-23         | trig | trig | trig | H1delta2 | trig | N2-1998 | trig | trig |
| A/swine/Minnesota/SG1403/2011/H1N2--2011-09-27         | trig | trig | trig | H1delta2 | trig | N2-2002 | trig | trig |
| A/swine/Mississippi/A01202799/2011/H1N2--2011-11-03    | trig | trig | trig | H1delta2 | trig | N2-2002 | trig | trig |
| A/swine/Missouri/A01270665/2012/H1N2--2012-10-02       | trig | trig | trig | H1delta2 | trig | N2-2002 | trig | trig |
| A/swine/Nebraska/02866/2009/H1N2--2009-07-08           | trig | trig | trig | H1delta2 | trig | N2-1998 | trig | trig |
| A/swine/Oklahoma/02722/2009/H1N2--2009-04-10           | trig | trig | trig | H1delta2 | trig | N2-2002 | trig | trig |

|                                                     |      |      |      |        |      |           |      |      |
|-----------------------------------------------------|------|------|------|--------|------|-----------|------|------|
| A/swine/Illinois/A01049905/2011/H1N1--2011-04-27    | trig | trig | trig | H1gam1 | pdm  | classical | trig | trig |
| A/swine/Arkansas/SG1323/2009/H1N1--2009-10-12       | trig | trig | trig | H1gam1 | trig | classical | trig | trig |
| A/swine/Illinois/02510/2009/H1N1--2009-01-12        | trig | trig | trig | H1gam1 | trig | classical | trig | trig |
| A/swine/Illinois/02695/2009/H1N1--2009-03-31        | trig | trig | trig | H1gam1 | trig | classical | trig | trig |
| A/swine/Illinois/A01134216/2011/H1N1--2011-01-31    | trig | trig | trig | H1gam1 | trig | classical | trig | trig |
| A/swine/Illinois/A01134216/2011/H1N1--2011-01-31    | trig | trig | trig | H1gam1 | trig | classical | trig | trig |
| A/swine/Illinois/A01240830/2011/H1N2--2011-12-30    | trig | trig | trig | H1gam1 | trig | N2-1998   | trig | trig |
| A/swine/Indiana/A00968351/2011/H1N1--2011-10-06     | trig | trig | trig | H1gam1 | trig | classical | trig | trig |
| A/swine/Indiana/A01202622/2011/H1N1--2011-09-28     | trig | trig | trig | H1gam1 | trig | classical | trig | trig |
| A/swine/Indiana/A01203320/2012/H1N1--2012-03-06     | trig | trig | trig | H1gam1 | trig | classical | trig | trig |
| A/swine/Michigan/A01202708/2011/H1N1--2011-10-18    | trig | trig | trig | H1gam1 | trig | classical | trig | trig |
| A/swine/Minnesota/02905/2009/H1N1--2009-10-21       | trig | trig | trig | H1gam1 | trig | classical | trig | trig |
| A/swine/Minnesota/A01134331/2010/H1N1--2010-11-22   | trig | trig | trig | H1gam1 | trig | classical | trig | trig |
| A/swine/Minnesota/SG1340/2009/H1N1--2009-10-22      | trig | trig | trig | H1gam1 | trig | classical | trig | trig |
| A/swine/Minnesota/SG1371/2010/H1N1--2010-11-19      | trig | trig | trig | H1gam1 | trig | classical | trig | trig |
| A/swine/Minnesota/SG1404/2011/H1N1--2011-08-31      | trig | trig | trig | H1gam1 | trig | classical | trig | trig |
| A/swine/Nebraska/A01327160/2012/H1N1--2012-03-19    | trig | trig | trig | H1gam1 | trig | classical | trig | trig |
| A/swine/North Carolina/SG1334/2009/H1N1--2009-01-20 | trig | trig | trig | H1gam1 | trig | classical | trig | trig |
| A/swine/North Carolina/SG1361/2010/H1N1--2010-06-18 | trig | trig | trig | H1gam1 | trig | classical | trig | trig |
| A/swine/North Carolina/SG1387/2011/H1N1--2011-09-30 | trig | trig | trig | H1gam1 | trig | classical | trig | trig |
| A/swine/Virginia/A01202625/2011/H1N1--2011-09-29    | trig | trig | trig | H1gam1 | trig | classical | trig | trig |
| A/swine/Arkansas/02598/2009/H3N2--2009-02-12        | trig | trig | trig | H3     | trig | N2-2002   | trig | trig |
| A/swine/Arkansas/02863/2009/H3N2--2009-06-26        | trig | trig | trig | H3     | trig | N2-2002   | trig | trig |
| A/swine/Georgia/02604/2009/H3N2--2009-02-20         | trig | trig | trig | H3     | trig | N2-2002   | trig | trig |
| A/swine/Illinois/02907/2009/H3N2--2009-10-21        | trig | trig | trig | H3     | trig | N2-2002   | trig | trig |
| A/swine/Illinois/53612-2/2009/H3N2--2009-08-20      | trig | trig | trig | H3     | trig | N2-2002   | trig | trig |
| A/swine/Illinois/53612-3/2009/H3N2--2009-09-21      | trig | trig | trig | H3     | trig | N2-2002   | trig | trig |
| A/swine/Illinois/53612-6/2010/H3N2--2010-04-22      | trig | trig | trig | H3     | trig | N2-2002   | trig | trig |
| A/swine/Illinois/A01047009/2010/H3N2--2010-11-22    | trig | trig | trig | H3     | trig | N2-2002   | trig | trig |
| A/swine/Illinois/A01047014/2010/H3N2--2010-11-22    | trig | trig | trig | H3     | trig | N2-2002   | trig | trig |
| A/swine/Illinois/A01047183/2010/H3N2--2010-11-30    | trig | trig | trig | H3     | trig | N2-2002   | trig | trig |



|                                                  |      |      |      |    |      |         |      |      |
|--------------------------------------------------|------|------|------|----|------|---------|------|------|
| A/swine/Illinois/A01047188/2010/H3N2--2010-11-30 | trig | trig | trig | H3 | trig | N2-2002 | trig | trig |
| A/swine/Illinois/A01047528/2010/H3N2--2010-12-02 | trig | trig | trig | H3 | trig | N2-2002 | trig | trig |
| A/swine/Illinois/A01047529/2010/H3N2--2010-12-02 | trig | trig | trig | H3 | trig | N2-2002 | trig | trig |
| A/swine/Illinois/A01057087/2010/H3N2--2010-04-28 | trig | trig | trig | H3 | trig | N2-2002 | trig | trig |
| A/swine/Illinois/A01076708/2010/H3N2--2010-11-01 | trig | trig | trig | H3 | trig | N2-2002 | trig | trig |
| A/swine/Illinois/A01076709/2010/H3N2--2010-11-01 | trig | trig | trig | H3 | trig | N2-2002 | trig | trig |
| A/swine/Illinois/A01076719/2010/H3N2--2010-11-01 | trig | trig | trig | H3 | trig | N2-2002 | trig | trig |
| A/swine/Illinois/A01076724/2010/H3N2--2010-11-01 | trig | trig | trig | H3 | trig | N2-2002 | trig | trig |
| A/swine/Illinois/A01076730/2010/H3N2--2010-11-01 | trig | trig | trig | H3 | trig | N2-2002 | trig | trig |
| A/swine/Illinois/A01076735/2010/H3N2--2010-11-01 | trig | trig | trig | H3 | trig | N2-2002 | trig | trig |
| A/swine/Illinois/A01076768/2010/H3N2--2010-10-26 | trig | trig | trig | H3 | trig | N2-2002 | trig | trig |
| A/swine/Illinois/A01076859/2010/H3N2--2010-11-11 | trig | trig | trig | H3 | trig | N2-2002 | trig | trig |
| A/swine/Illinois/A01201770/2011/H3N2--2011-06-19 | trig | trig | trig | H3 | trig | N2-2002 | trig | trig |
| A/swine/Illinois/A01271617/2012/H3N2--2012-10-30 | trig | trig | trig | H3 | trig | N2-2002 | trig | trig |
| A/swine/Indiana/A00968321/2010/H3N2--2010-10-18  | trig | trig | trig | H3 | trig | N2-2002 | trig | trig |
| A/swine/Indiana/A00968325/2010/H3N2--2010-12-17  | trig | trig | trig | H3 | trig | N2-2002 | trig | trig |
| A/swine/Indiana/A01049091/2010/H3N2--2010-11-18  | trig | trig | trig | H3 | trig | N2-2002 | trig | trig |
| A/swine/Indiana/A01049349/2010/H3N2--2010-12-29  | trig | trig | trig | H3 | trig | N2-2002 | trig | trig |
| A/swine/Indiana/A01049653/2011/H3N2--2011-03-08  | trig | trig | trig | H3 | trig | N2-2002 | trig | trig |
| A/swine/Indiana/A01049744/2011/H3N2--2011-03-23  | trig | trig | trig | H3 | trig | N2-2002 | trig | trig |
| A/swine/Indiana/A01049745/2011/H3N2--2011-03-23  | trig | trig | trig | H3 | trig | N2-2002 | trig | trig |
| A/swine/Iowa/03734/2011/H3N2--2011-01-24         | trig | trig | trig | H3 | trig | N2-2002 | trig | trig |
| A/swine/Iowa/13A016/2013/H3N2--2013-01-28        | trig | trig | trig | H3 | trig | N2-2002 | trig | trig |
| A/swine/Iowa/13G060/2013/H3N2--2013-07-19        | trig | trig | trig | H3 | trig | N2-2002 | trig | trig |
| A/swine/Iowa/A01049032/2010/H3N2--2010-11-16     | trig | trig | trig | H3 | trig | N2-2002 | trig | trig |
| A/swine/Iowa/A01049033/2010/H3N2--2010-11-16     | trig | trig | trig | H3 | trig | N2-2002 | trig | trig |
| A/swine/Iowa/A01049112/2010/H3N2--2010-11-22     | trig | trig | trig | H3 | trig | N2-2002 | trig | trig |
| A/swine/Iowa/A01049113/2010/H3N2--2010-11-22     | trig | trig | trig | H3 | trig | N2-2002 | trig | trig |
| A/swine/Iowa/A01049160/2010/H3N2--2010-11-30     | trig | trig | trig | H3 | trig | N2-2002 | trig | trig |
| A/swine/Iowa/A01049185/2010/H3N2--2010-12-01     | trig | trig | trig | H3 | trig | N2-2002 | trig | trig |
| A/swine/Iowa/A01049254/2010/H3N2--2010-12-09     | trig | trig | trig | H3 | trig | N2-2002 | trig | trig |

|                                                        |      |      |      |    |      |         |      |      |
|--------------------------------------------------------|------|------|------|----|------|---------|------|------|
| A/swine/lowa/A01049317/2010/H3N2--2010-12-22           | trig | trig | trig | H3 | trig | N2-2002 | trig | trig |
| A/swine/lowa/A01057188/2010/H3N2--2010-05-24           | trig | trig | trig | H3 | trig | N2-2002 | trig | trig |
| A/swine/lowa/A01076309/2010/H3N2--2010-09-20           | trig | trig | trig | H3 | trig | N2-2002 | trig | trig |
| A/swine/lowa/A01076311/2010/H3N2--2010-09-20           | trig | trig | trig | H3 | trig | N2-2002 | trig | trig |
| A/swine/lowa/A01076507/2010/H3N2--2010-10-04           | trig | trig | trig | H3 | trig | N2-2002 | trig | trig |
| A/swine/lowa/A01076508/2010/H3N2--2010-10-04           | trig | trig | trig | H3 | trig | N2-2002 | trig | trig |
| A/swine/lowa/A01202088/2011/H3N2--2011-06-16           | trig | trig | trig | H3 | trig | N2-2002 | trig | trig |
| A/swine/lowa/A01202659/2011/H3N2--2011-10-06           | trig | trig | trig | H3 | trig | N2-2002 | trig | trig |
| A/swine/lowa/A01203248/2012/H3N2--2012-02-09           | trig | trig | trig | H3 | trig | N2-2002 | trig | trig |
| A/swine/lowa/A01243311/2012/H3N2--2012-04-23           | trig | trig | trig | H3 | trig | N2-2002 | trig | trig |
| A/swine/Kansas/015252/2009/H3N2--2009--                | trig | trig | trig | H3 | trig | N2-2002 | trig | trig |
| A/swine/Michigan/A01259000/2012/H3N2--2012-06-19       | trig | trig | trig | H3 | trig | N2-2002 | trig | trig |
| A/swine/Michigan/A01259002/2012/H3N2--2012-10-22       | trig | trig | trig | H3 | trig | N2-2002 | trig | trig |
| A/swine/Minnesota/02782/2009/H3N2--2009-05-07          | trig | trig | trig | H3 | trig | N2-2002 | trig | trig |
| A/swine/Minnesota/A01049346/2010/H3N2--2010-12-29      | trig | trig | trig | H3 | trig | N2-2002 | trig | trig |
| A/swine/Minnesota/A01049936/2011/H3N2--2011-05-03      | trig | trig | trig | H3 | trig | N2-2002 | trig | trig |
| A/swine/Minnesota/A01076196/2010/H3N2--2010-02-28      | trig | trig | trig | H3 | trig | N2-2002 | trig | trig |
| A/swine/Minnesota/A01076218/2010/H3N2--2010-08-01      | trig | trig | trig | H3 | trig | N2-2002 | trig | trig |
| A/swine/Minnesota/A01076531/2010/H3N2--2010-10-07      | trig | trig | trig | H3 | trig | N2-2002 | trig | trig |
| A/swine/Minnesota/A01076999/2010/H3N2--2010-09-22      | trig | trig | trig | H3 | trig | N2-2002 | trig | trig |
| A/swine/Minnesota/A01125992/2012/H3N2--2012-03-08      | trig | trig | trig | H3 | trig | N2-2002 | trig | trig |
| A/swine/Minnesota/A01134337/2010/H3N2--2010-11-17      | trig | trig | trig | H3 | trig | N2-2002 | trig | trig |
| A/swine/Minnesota/A01203517/2012/H3N2--2012-05-15      | trig | trig | trig | H3 | trig | N2-2002 | trig | trig |
| A/swine/Nebraska/A01049235/2010/H3N2--2010-12-07       | trig | trig | trig | H3 | trig | N2-2002 | trig | trig |
| A/swine/Nebraska/A01049937/2011/H3N2--2011-05-04       | trig | trig | trig | H3 | trig | N2-2002 | trig | trig |
| A/swine/Nebraska/A01116980/2011/H3N2--2011-11-02       | trig | trig | trig | H3 | trig | N2-2002 | trig | trig |
| A/swine/North Carolina/03289/2011/H3N2--2011-01-07     | trig | trig | trig | H3 | trig | N2-2002 | trig | trig |
| A/swine/North Carolina/A01049436/2011/H3N2--2011-01-19 | trig | trig | trig | H3 | trig | N2-2002 | trig | trig |
| A/swine/North Carolina/A01076178/2009/H3N2--2009-12-06 | trig | trig | trig | H3 | trig | N2-1998 | trig | trig |
| A/swine/North Carolina/A01076199/2010/H3N2--2010-03-14 | trig | trig | trig | H3 | trig | N2-2002 | trig | trig |
| A/swine/North Carolina/A01076204/2010/H3N2--2010-04-18 | trig | trig | trig | H3 | trig | N2-2002 | trig | trig |

|                                                        |      |      |      |       |      |         |      |      |
|--------------------------------------------------------|------|------|------|-------|------|---------|------|------|
| A/swine/North Carolina/A01076212/2010/H3N2--2010-06-27 | trig | trig | trig | H3    | trig | N2-2002 | trig | trig |
| A/swine/North Carolina/A01202766/2011/H3N2--2011-10-20 | trig | trig | trig | H3    | trig | N2-2002 | trig | trig |
| A/swine/North Carolina/SG1338/2009/H3N2--2009-02-06    | trig | trig | trig | H3    | trig | N2-2002 | trig | trig |
| A/swine/North Carolina/SG1358/2010/H3N2--2010-09-24    | trig | trig | trig | H3    | trig | N2-2002 | trig | trig |
| A/swine/North Carolina/SG1364/2010/H3N2--2010-11-24    | trig | trig | trig | H3    | trig | N2-2002 | trig | trig |
| A/swine/Oklahoma/001142/2009/H3N2--2009--              | trig | trig | trig | H3    | trig | N2-2002 | trig | trig |
| A/swine/Oklahoma/02530/2009/H3N2--2009-01-09           | trig | trig | trig | H3    | trig | N2-2002 | trig | trig |
| A/swine/Oklahoma/02985/2010/H3N2--2010-03-10           | trig | trig | trig | H3    | trig | N2-2002 | trig | trig |
| A/swine/Pennsylvania/A01076777/2010/H3N2--2010-10-25   | trig | trig | trig | H3    | trig | N2-2002 | trig | trig |
| A/swine/Pennsylvania/A01076779/2010/H3N2--2010-10-25   | trig | trig | trig | H3    | trig | N2-2002 | trig | trig |
| A/swine/Pennsylvania/A01201666/2011/H3N2--2011-06-14   | trig | trig | trig | H3    | trig | N2-2002 | trig | trig |
| A/swine/Texas/03042/2010/H3N2--2010-07-02              | trig | trig | trig | H3    | trig | N2-1998 | trig | trig |
| A/swine/Texas/SG1501/2010/H3N2--2010-04-20             | trig | trig | trig | H3    | trig | N2-2002 | trig | trig |
| A/swine/Illinois/02757/2009/H1N1--2009-04-28           | trig | trig | trig | human | trig | human   | trig | trig |
